# Supplementary material
Source: MDPI journal article supplement (https://www.mdpi.com/1424-2818/11/8/124)
Supplement: s1 [file s1]

## Supplementary Materials

**Figure S1.** *Apalone mutica* home range maps showing radio-locations, minimum convex polygons, 50%, 75%, and 95% clipped kernel density estimates (median CVh smoothing).

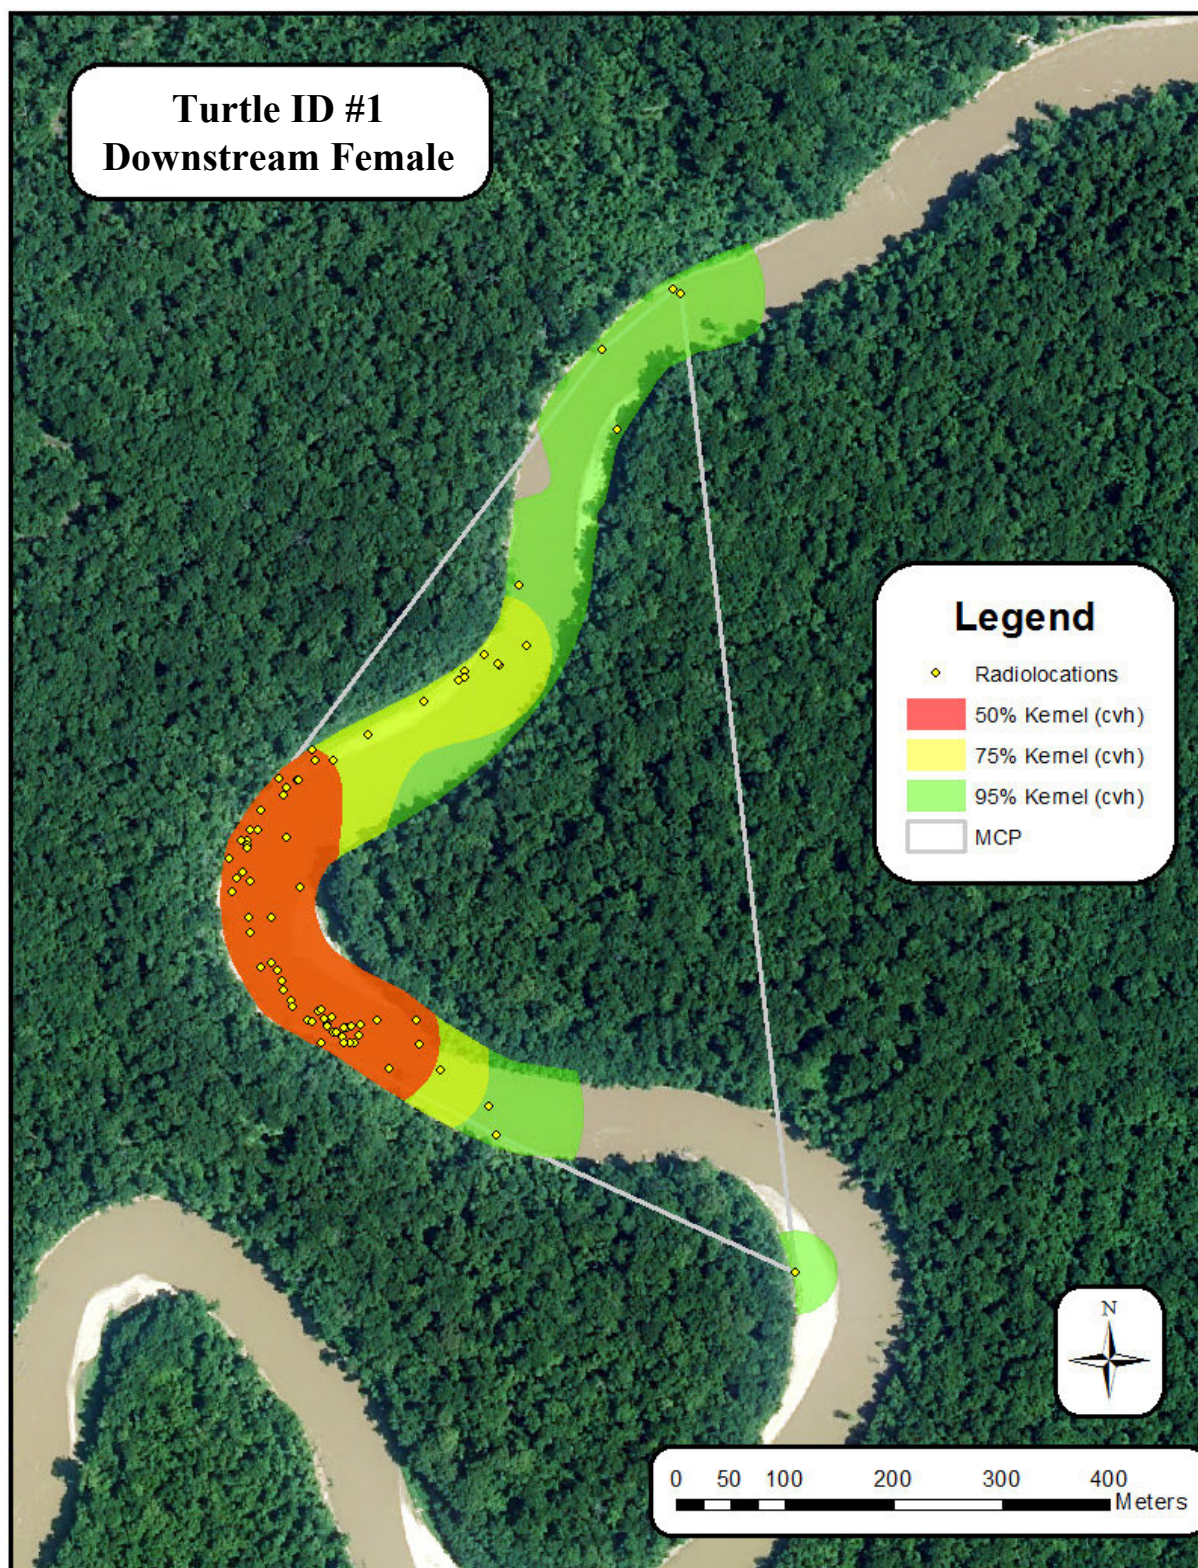

**Figure S1.1:** Downstream female *A. mutica* #1



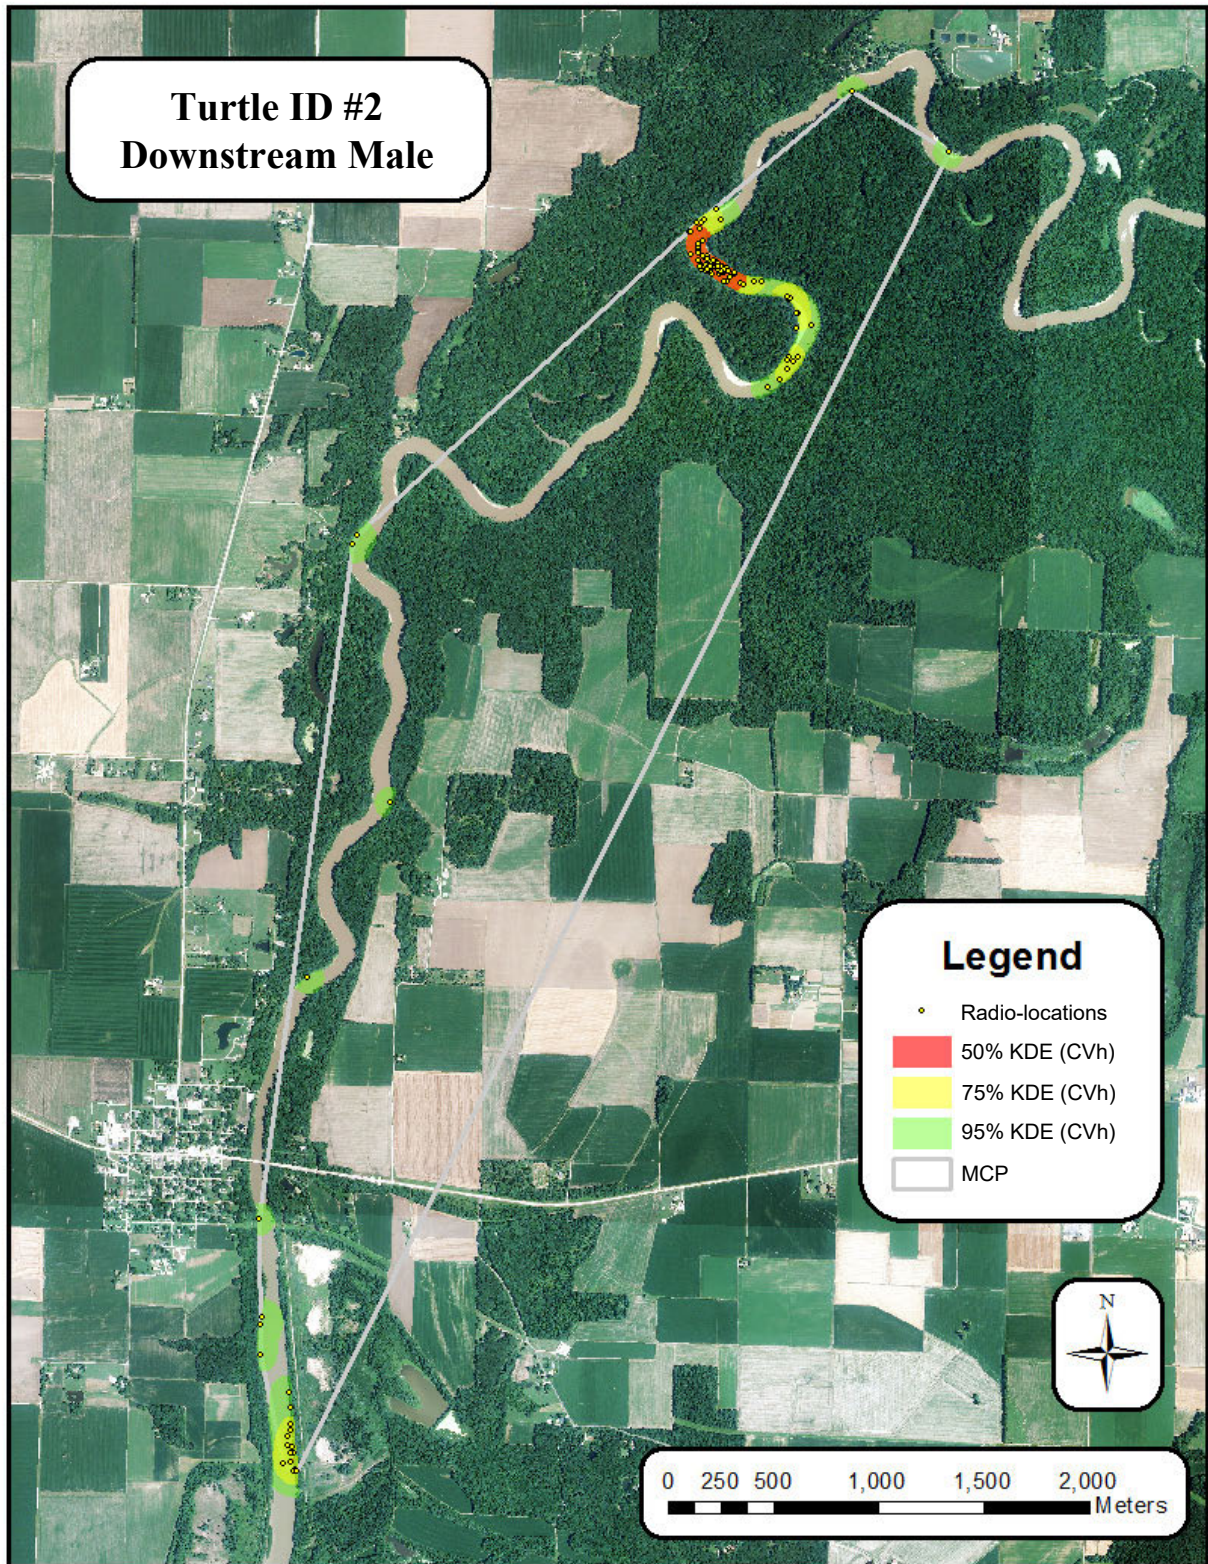

**Figure S1.2:** Downstream male *A. mutica* #2



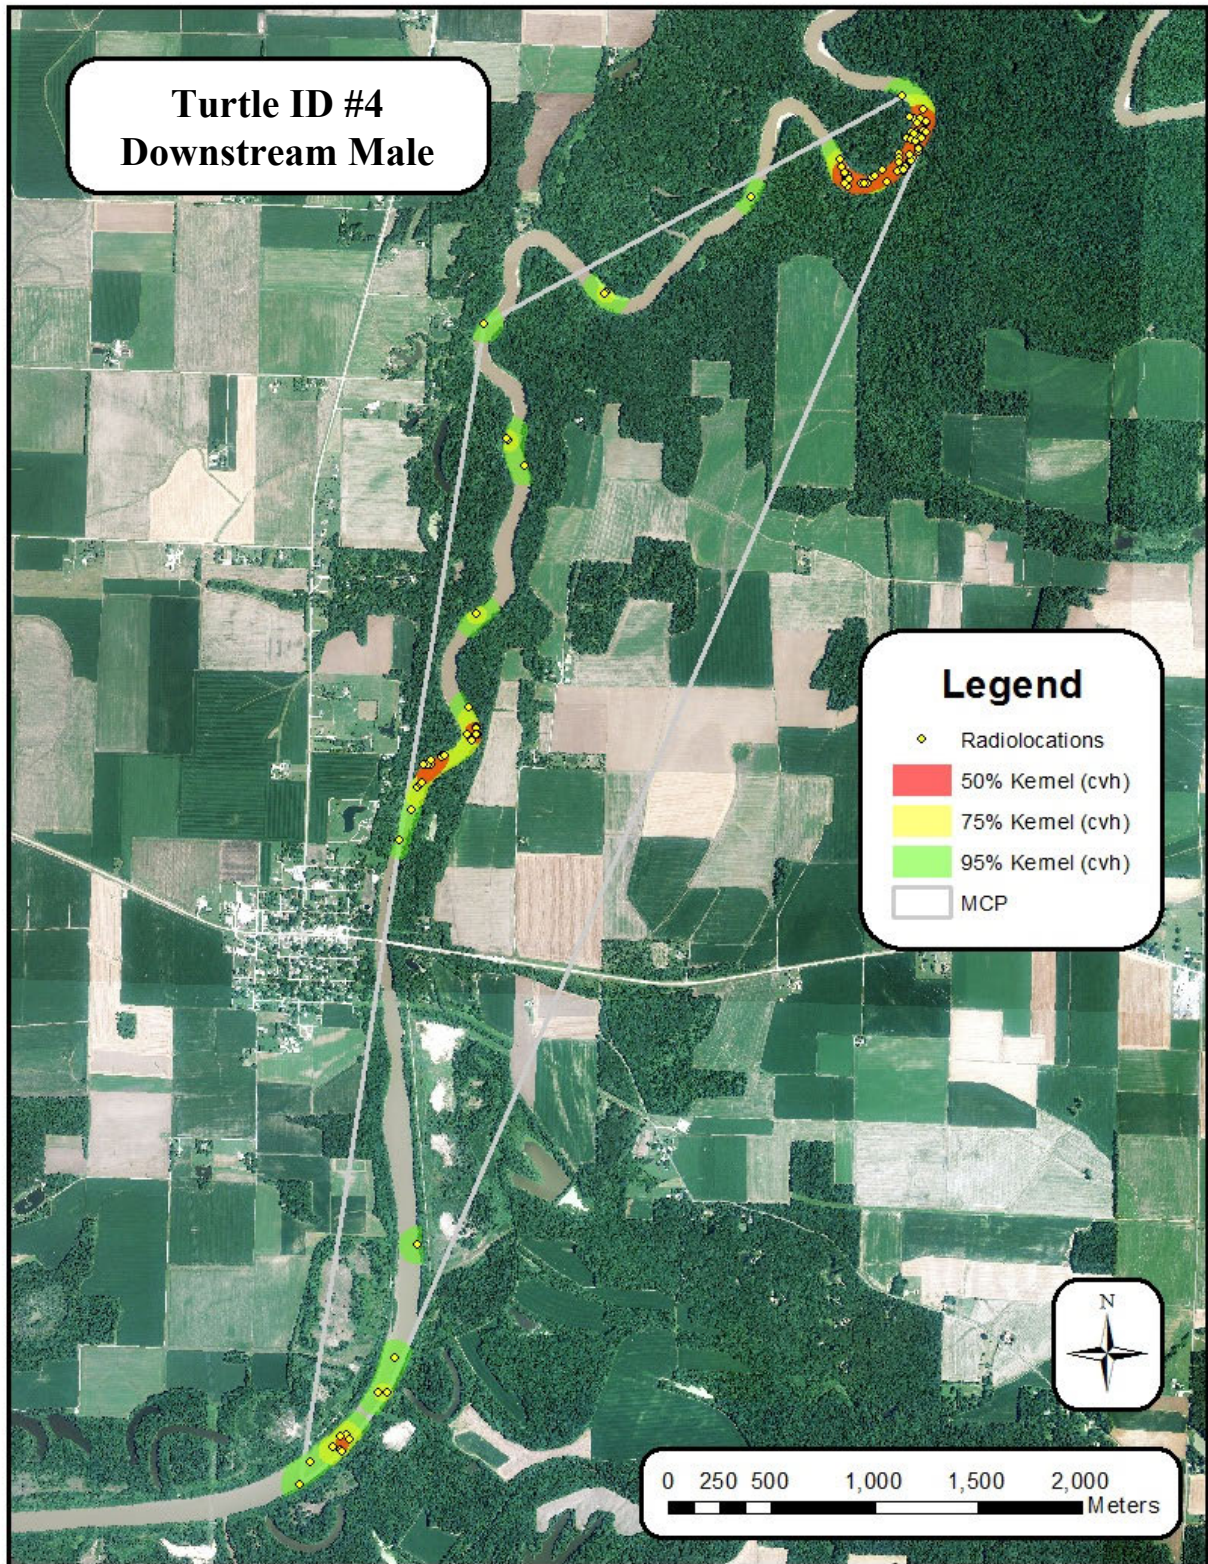

**Figure S1.3:** Downstream male *A. mutica* #4



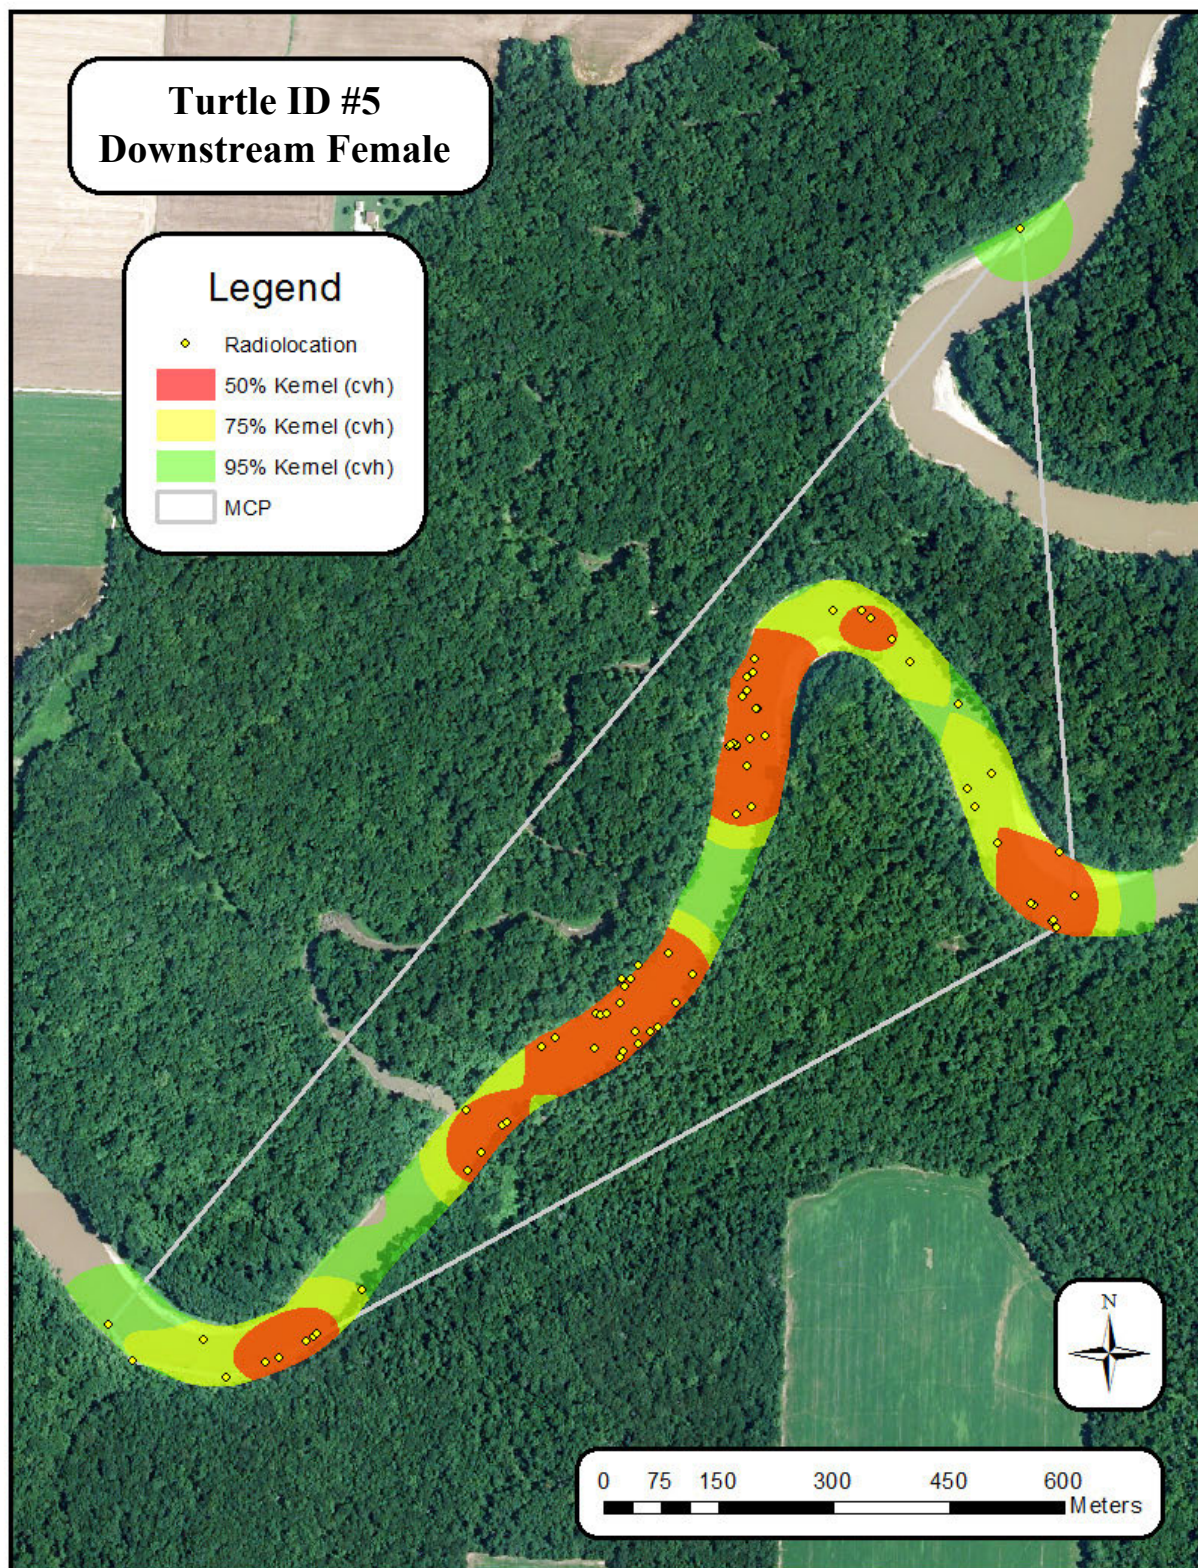

**Figure S1.4:** Downstream female *A. mutica* #5



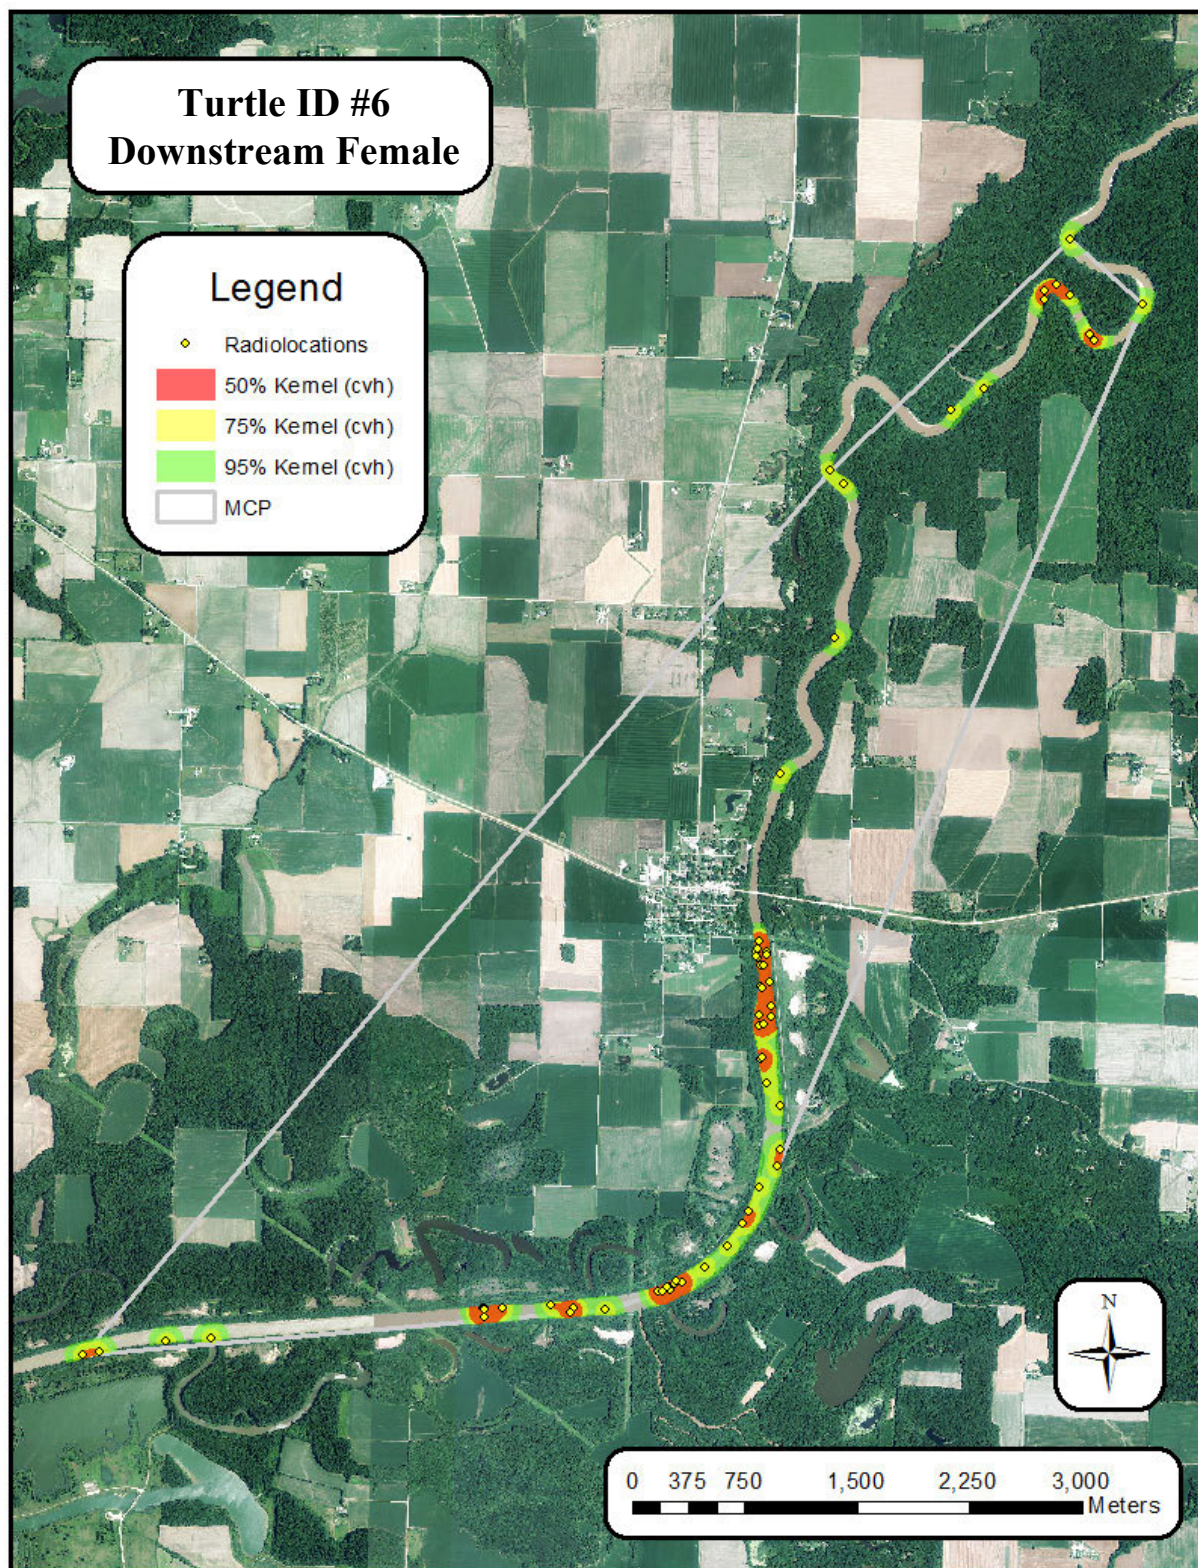

Figure S1.5: Downstream female *A. mutica* #6



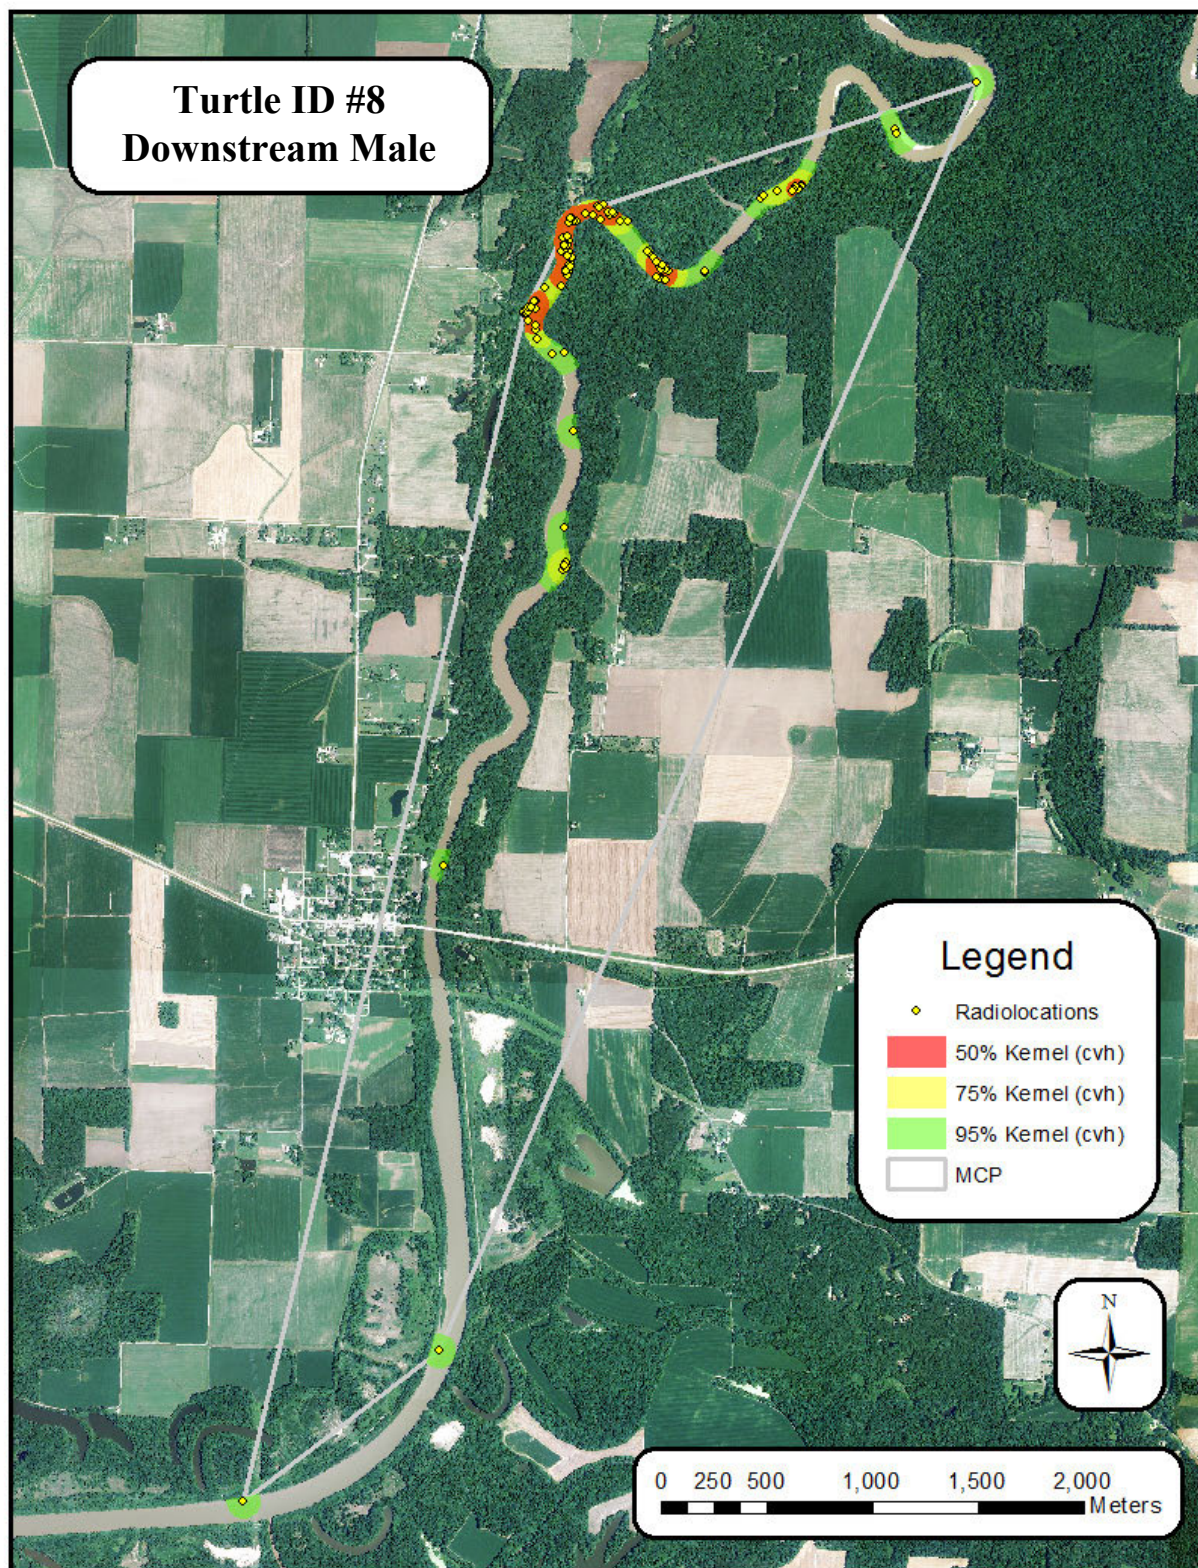

**Figure S1.6:** Downstream male *A. mutica* #8



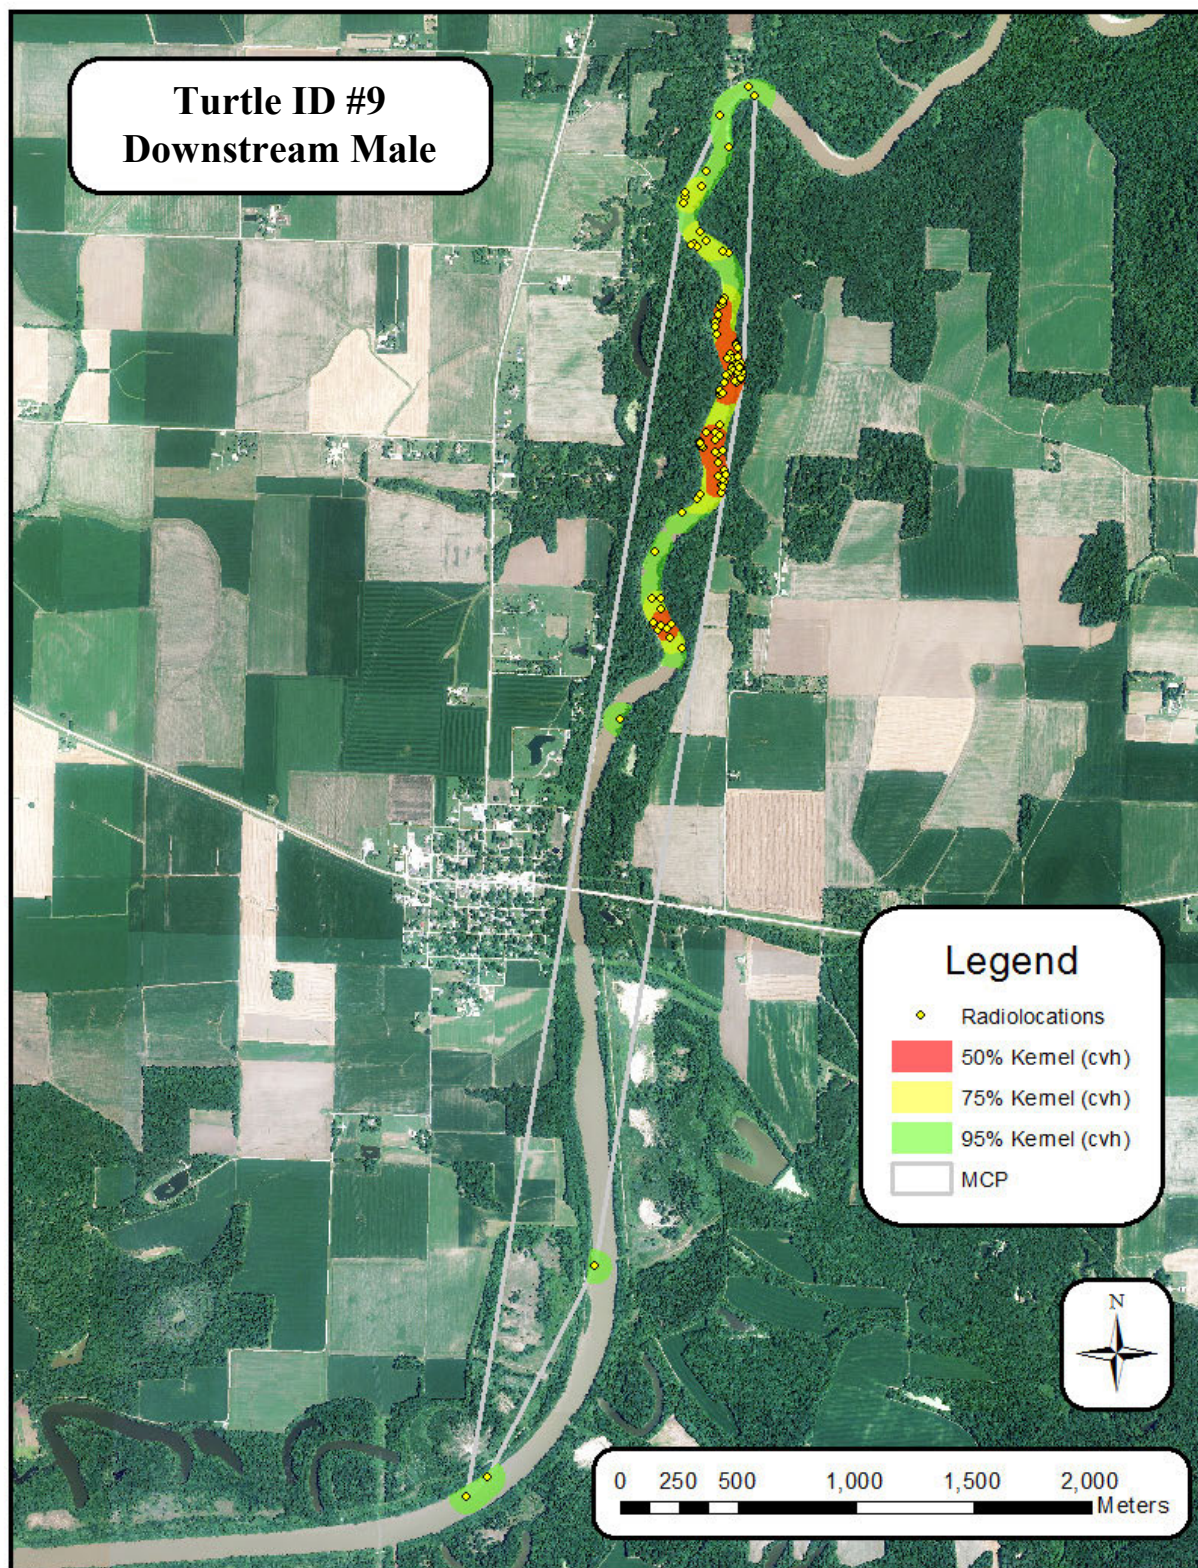

**Figure S1.7:** Downstream male *A. mutica* #9



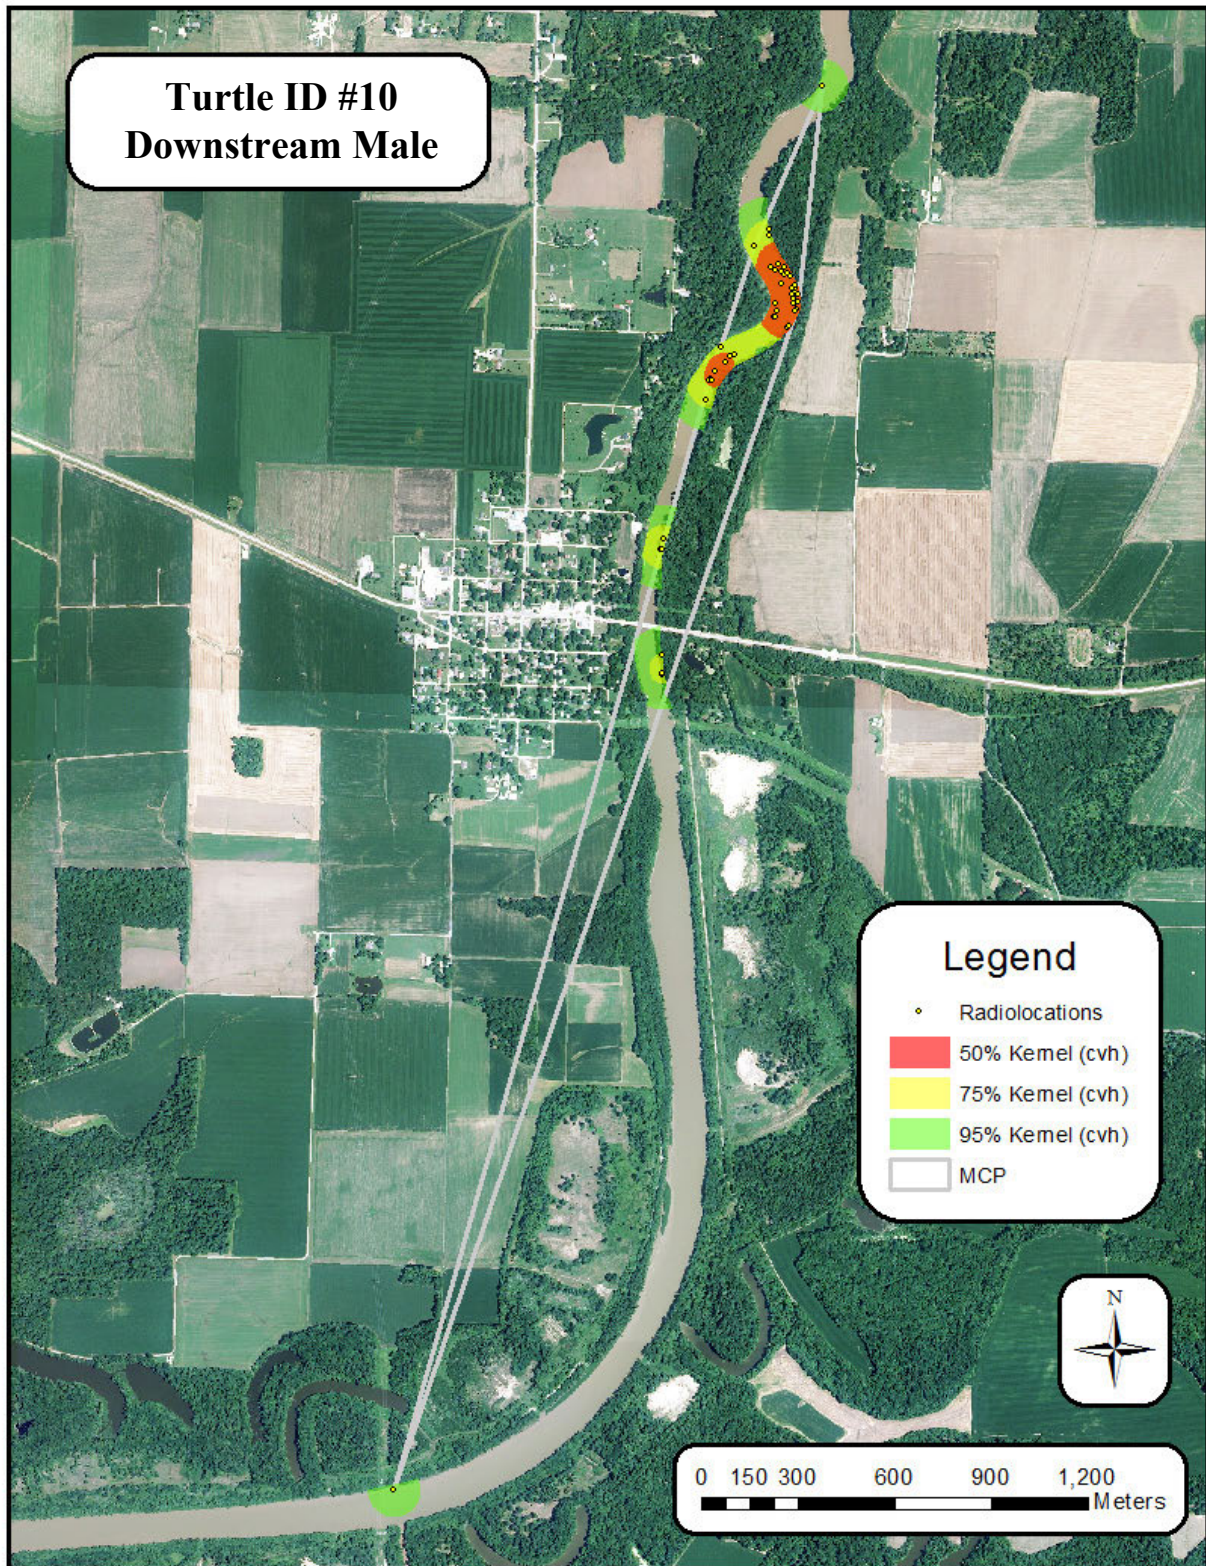

**Figure S1.8:** Downstream male *A. mutica* #10



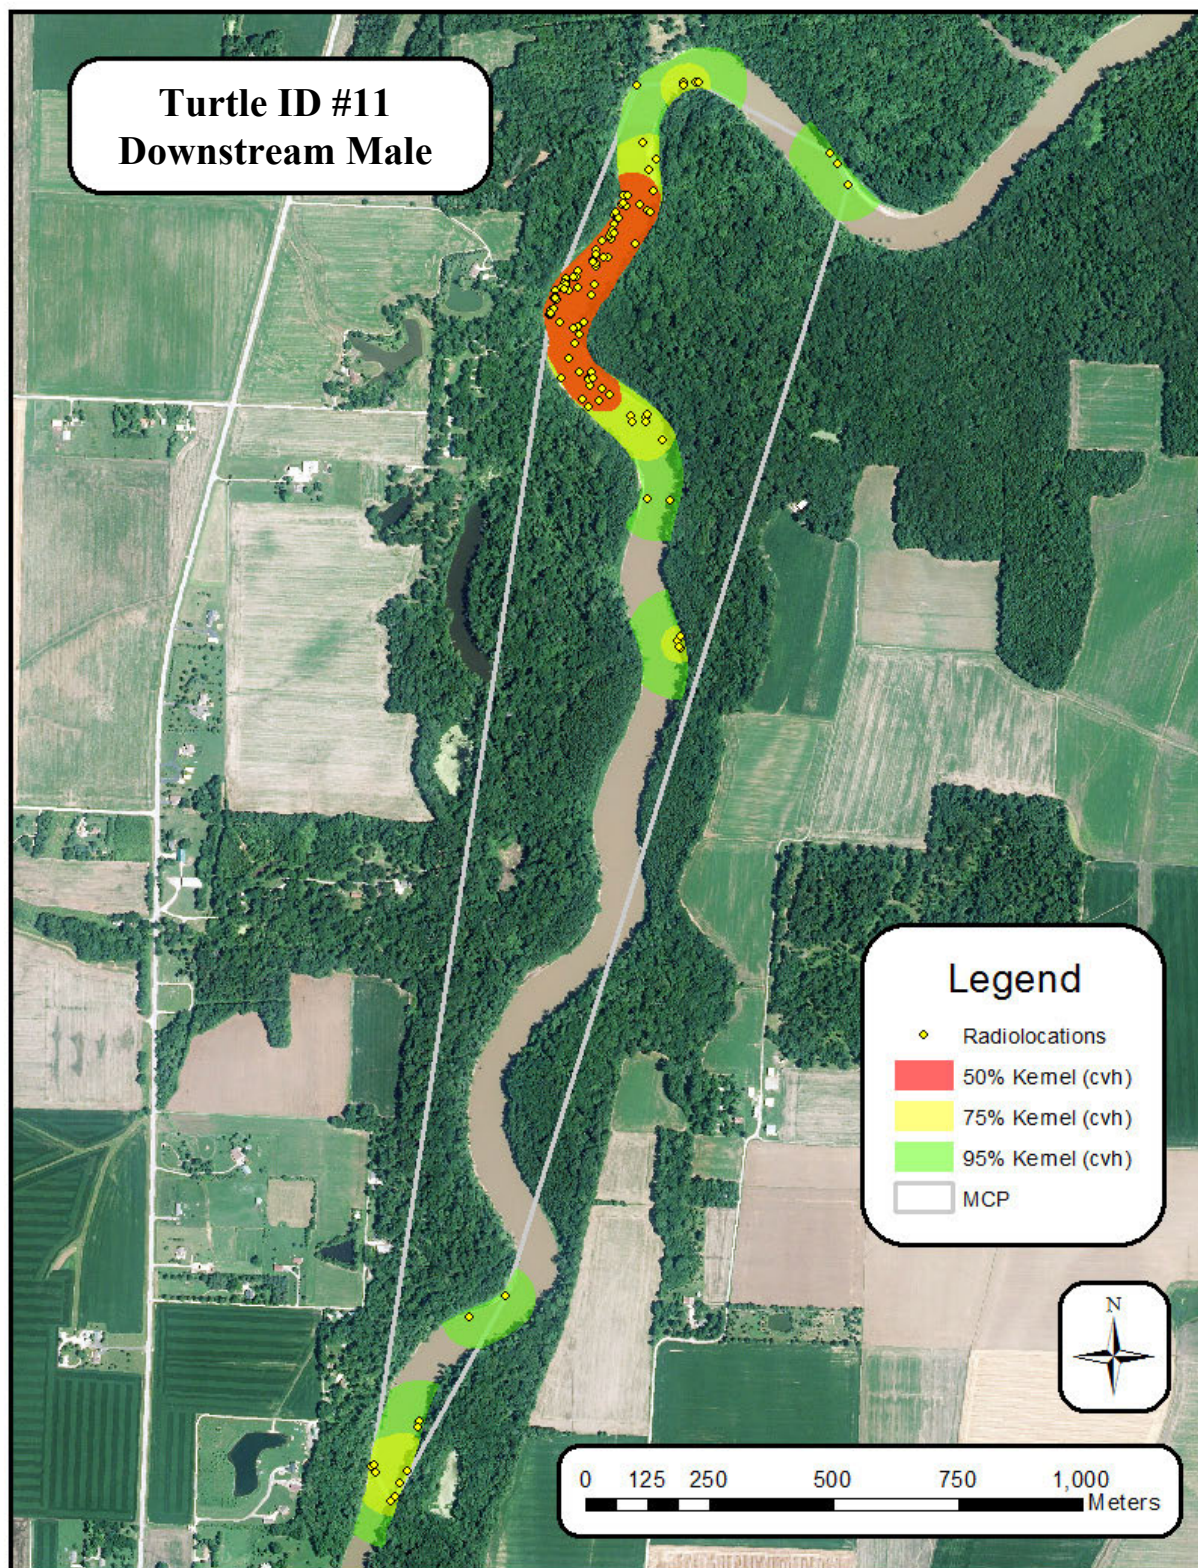

**Figure S1.9:** Downstream male *A. mutica* #11



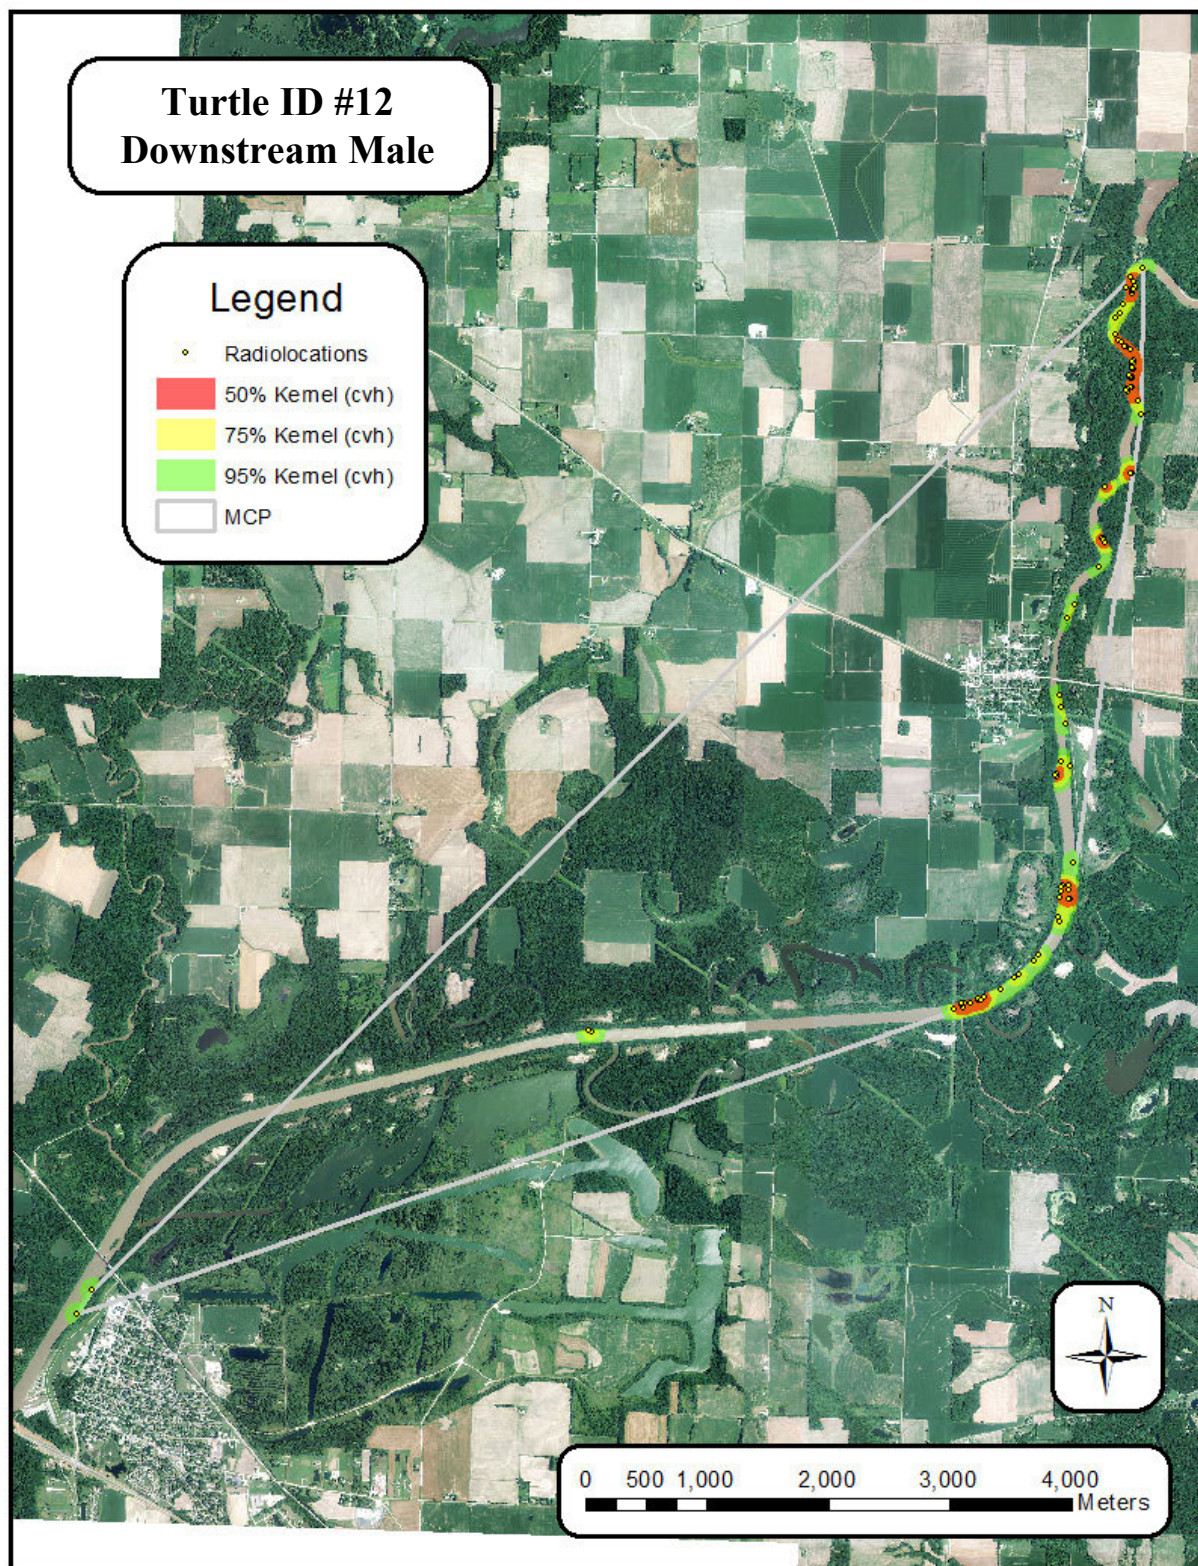

**Figure S1.10:** Downstream male *A. mutica* #12



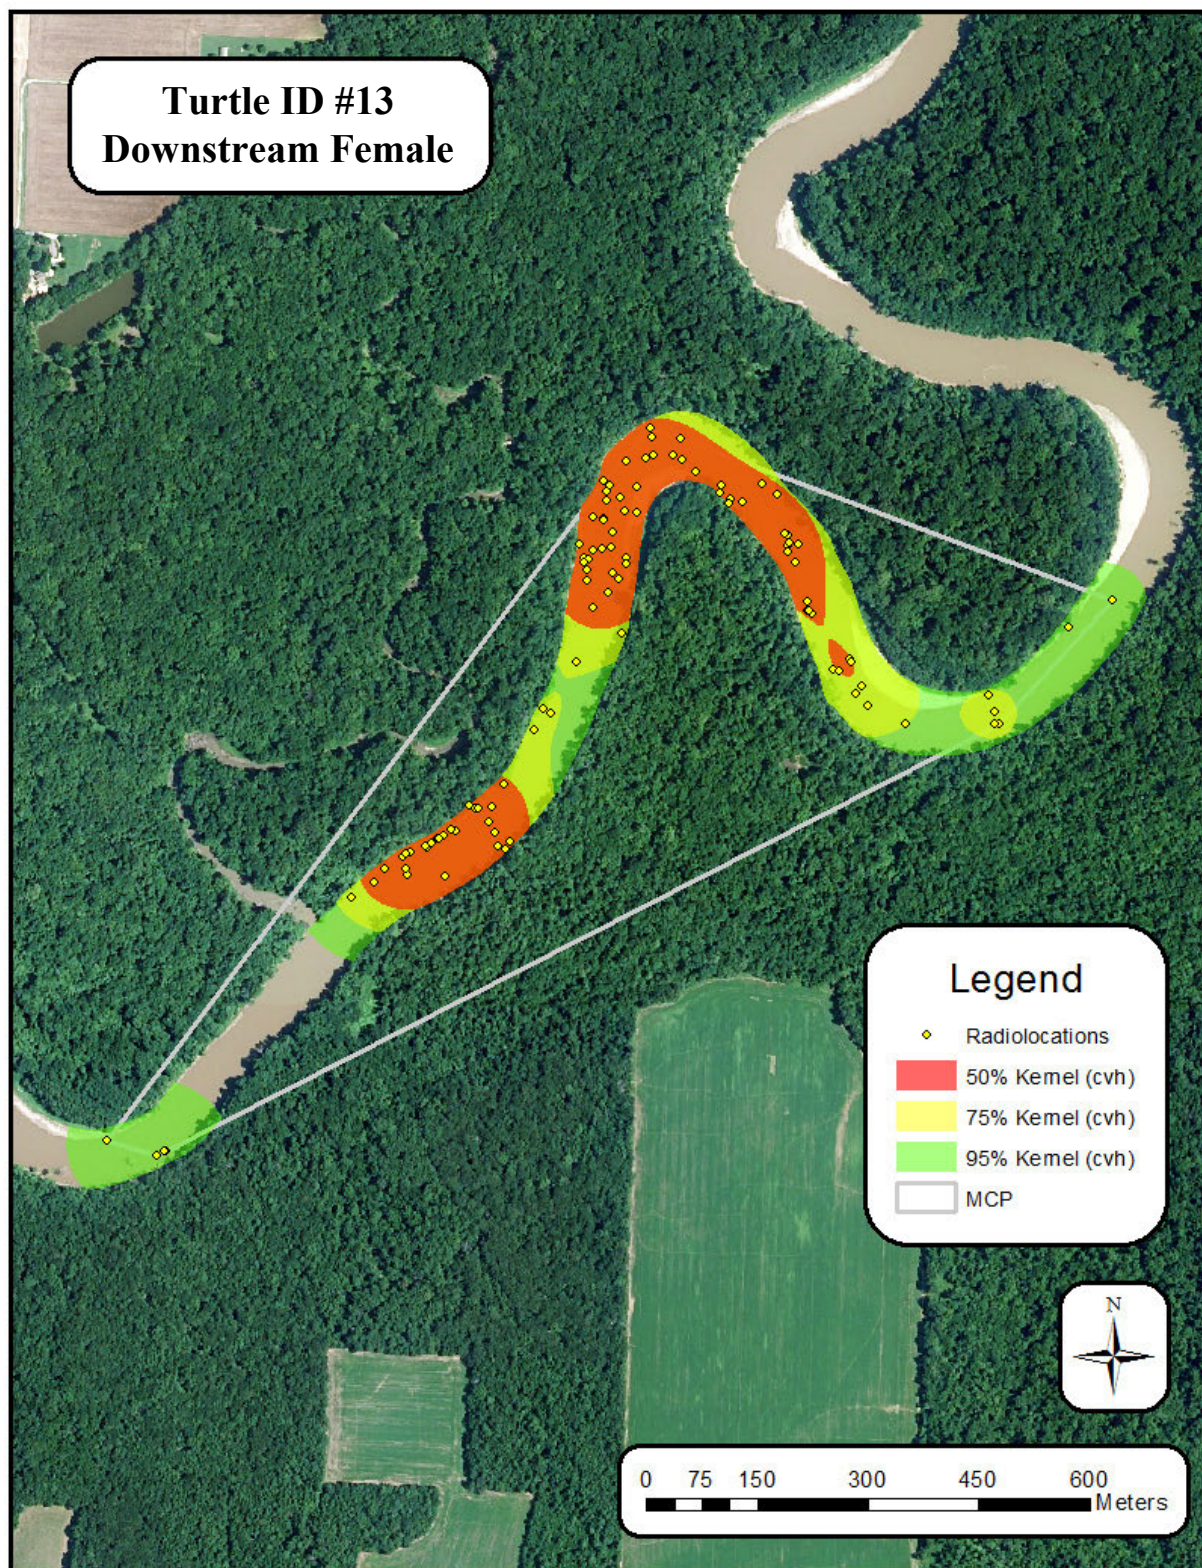

**Figure S1.11:** Downstream female *A. mutica* #13



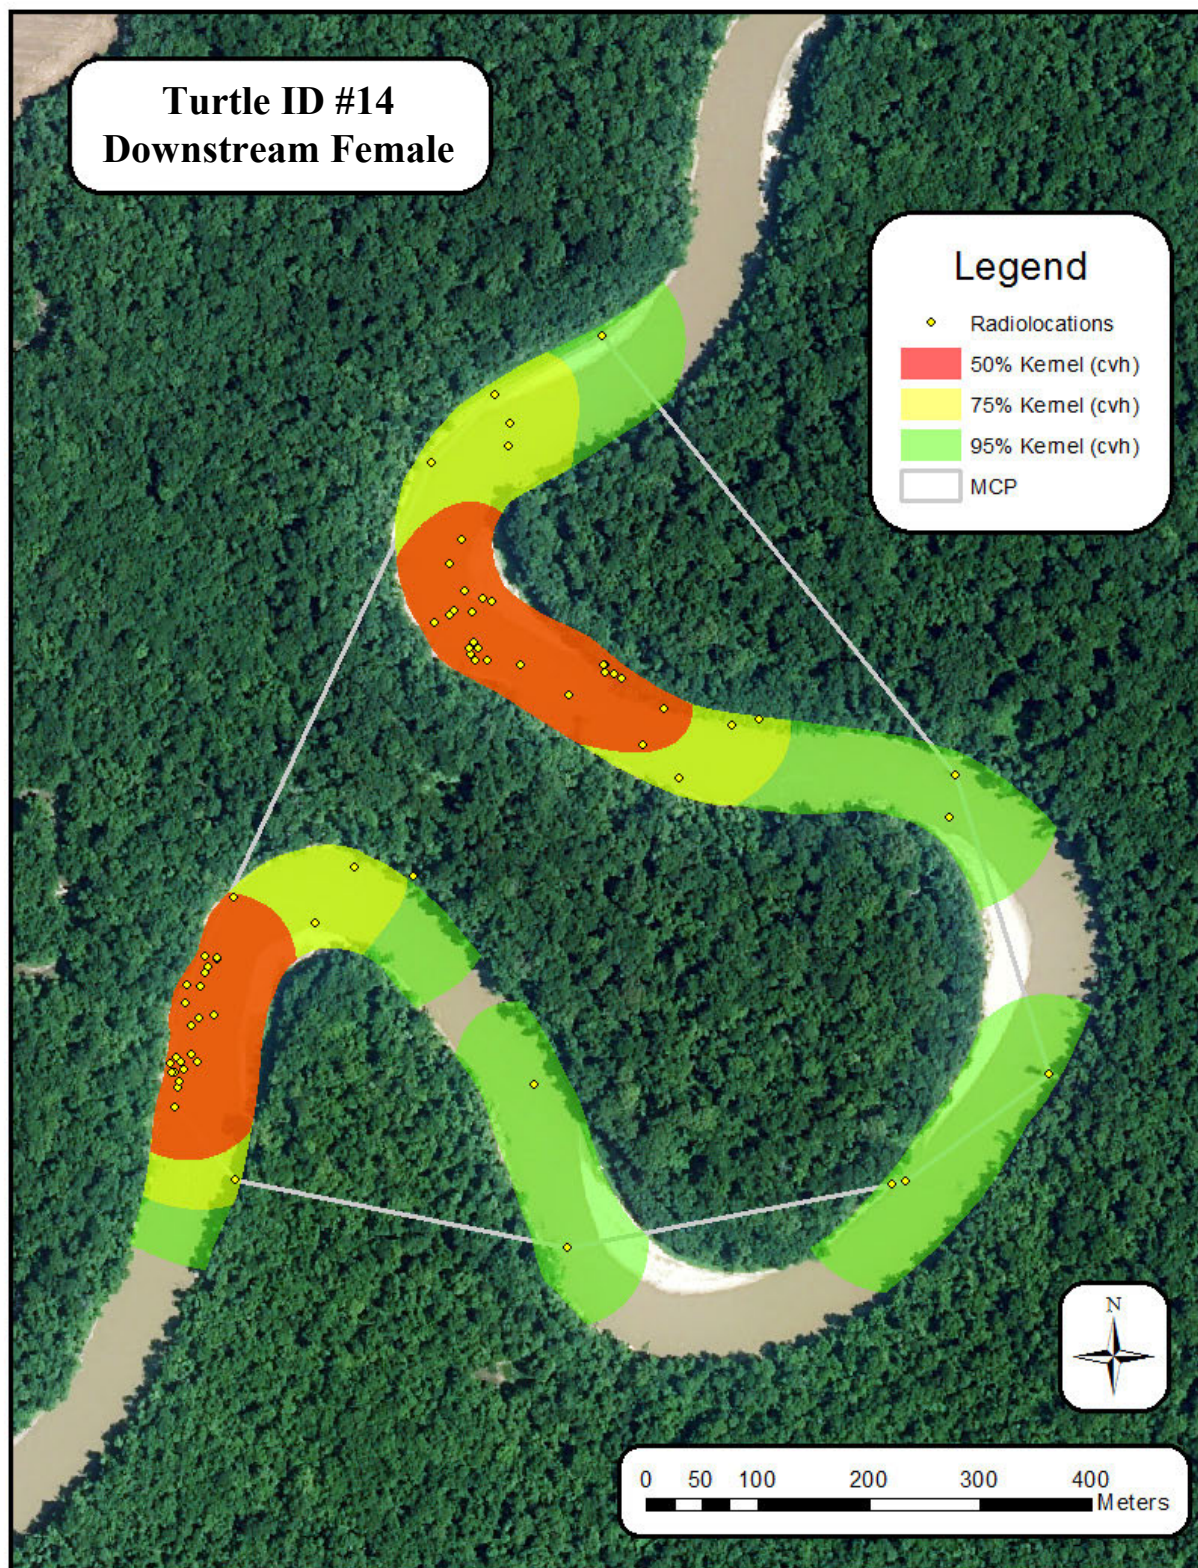

**Figure S1.12:** Downstream female *A. mutica* #14



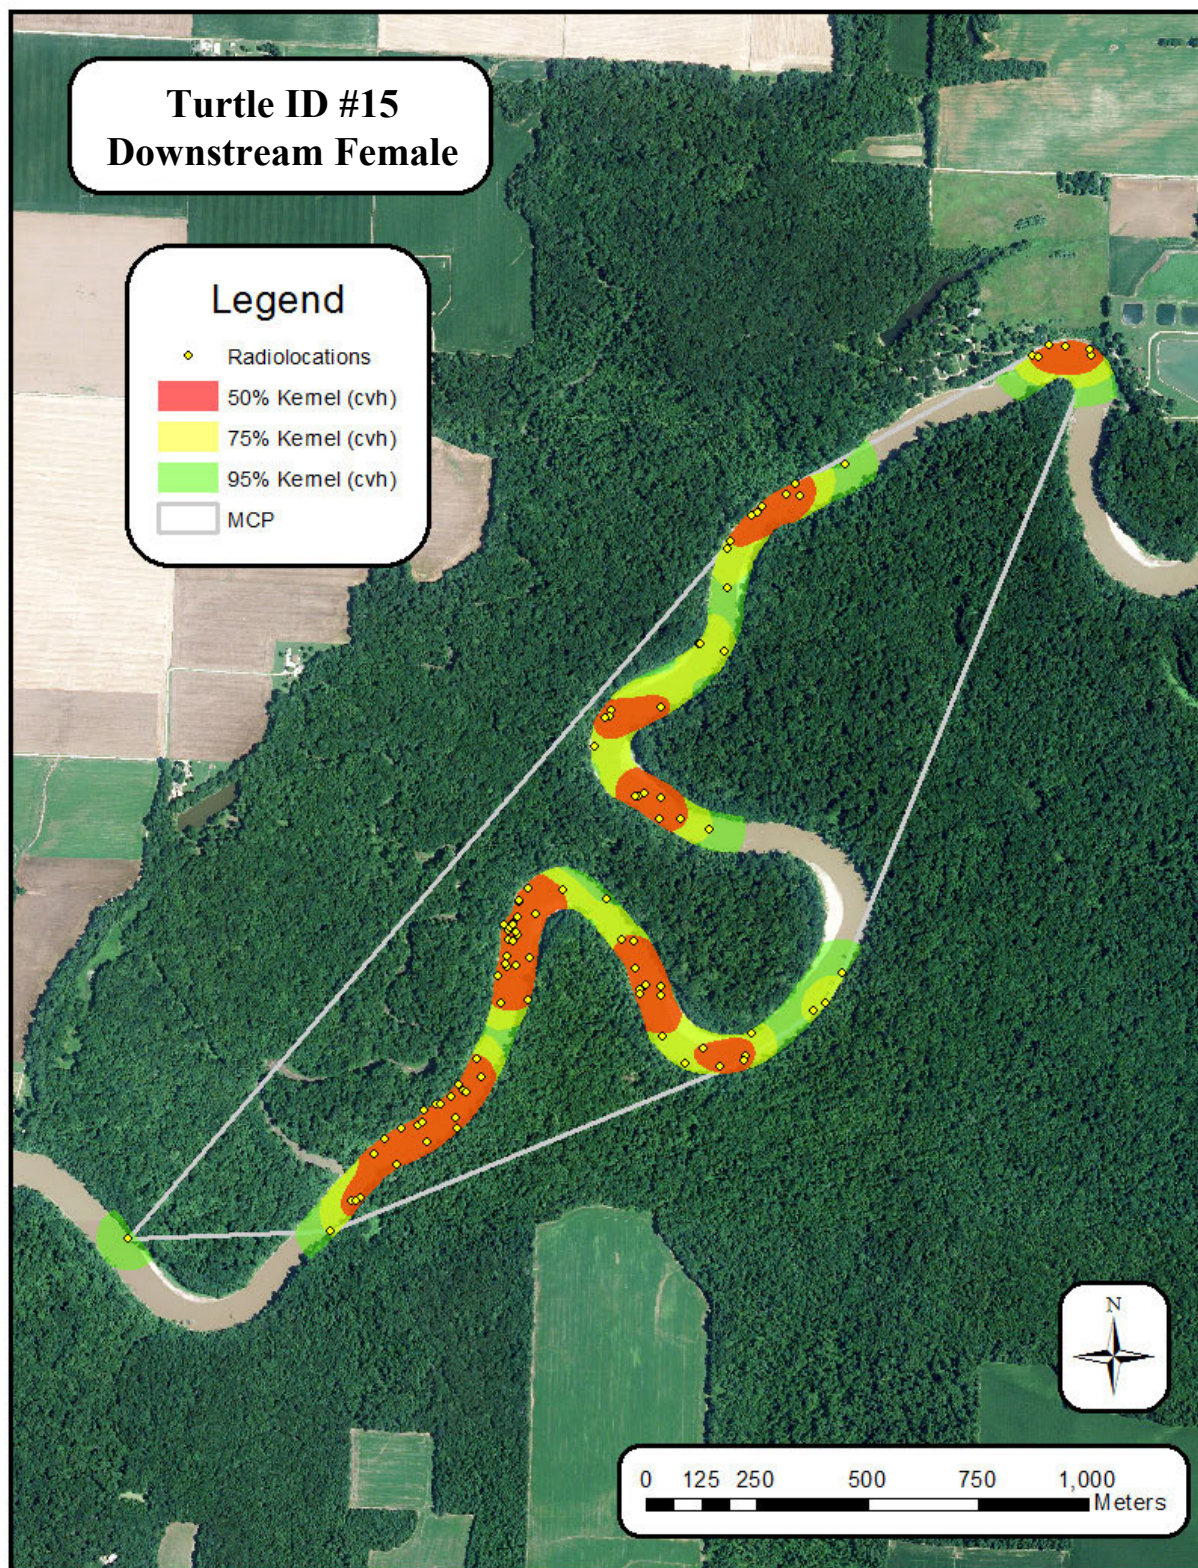

**Figure S1.13:** Downstream female *A. mutica* #15



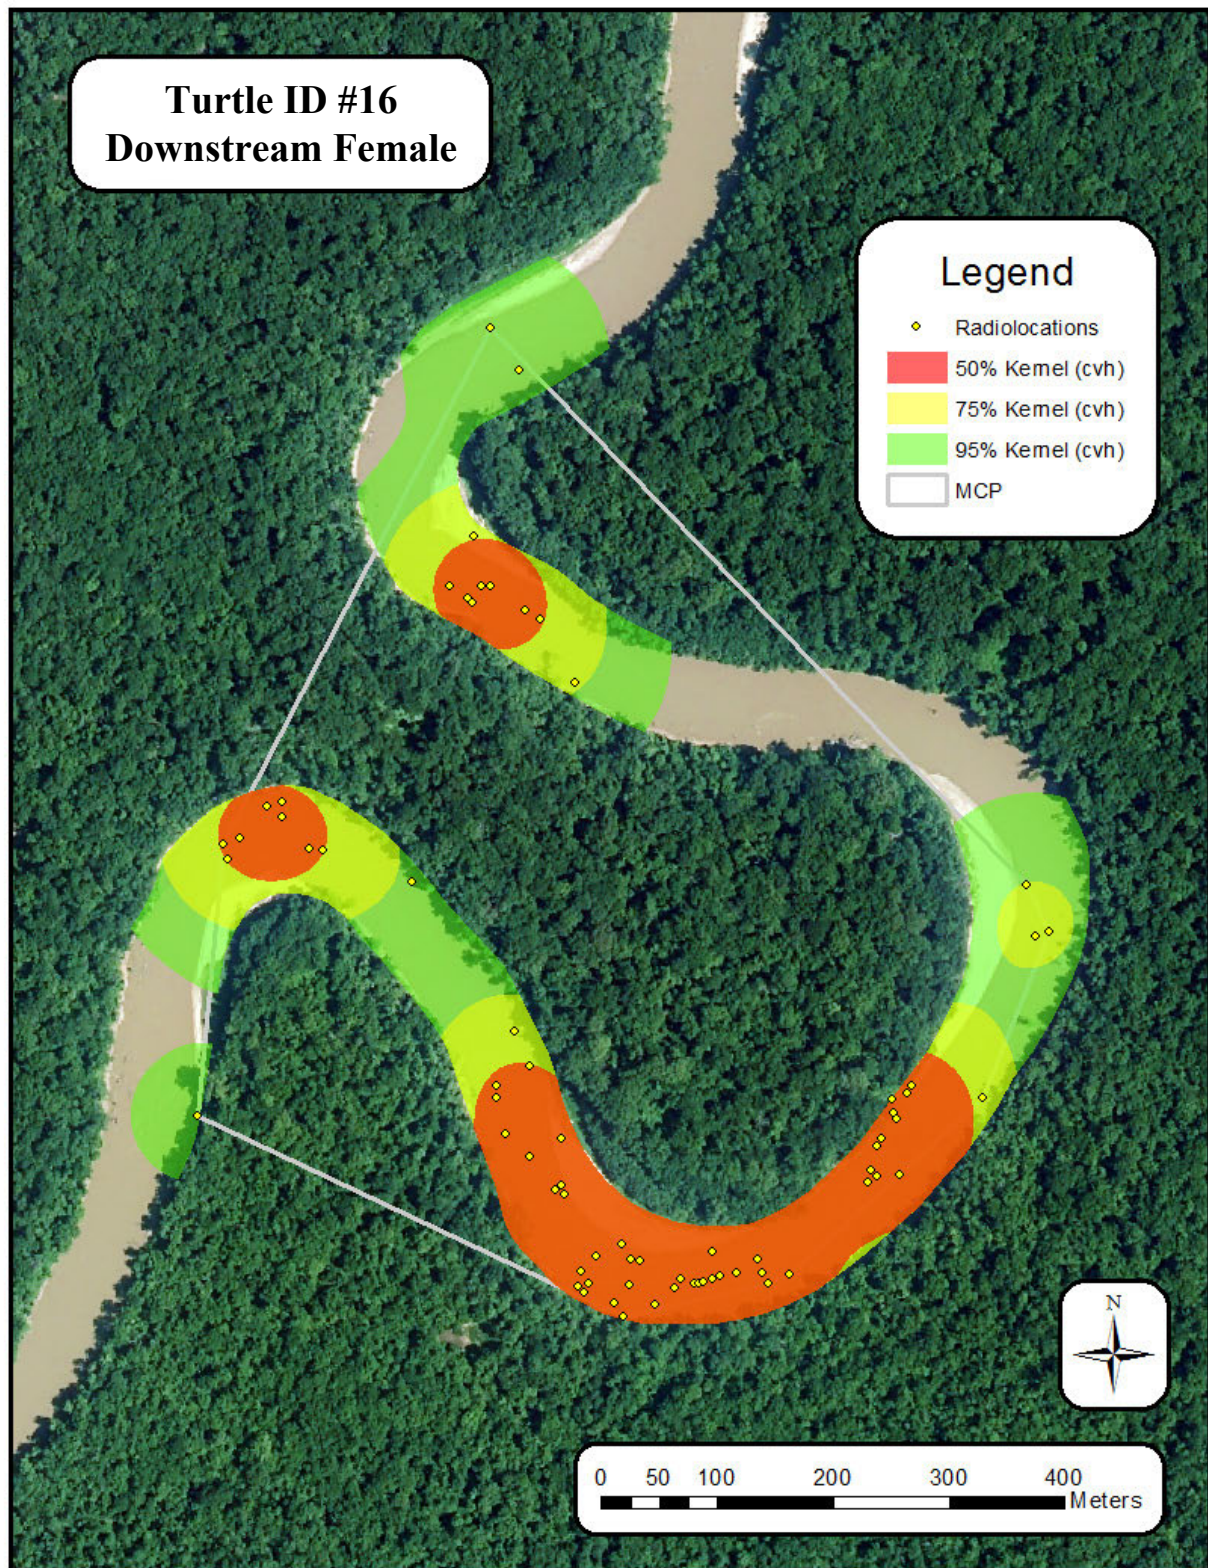

**Figure S1.14:** Downstream female *A. mutica* #16



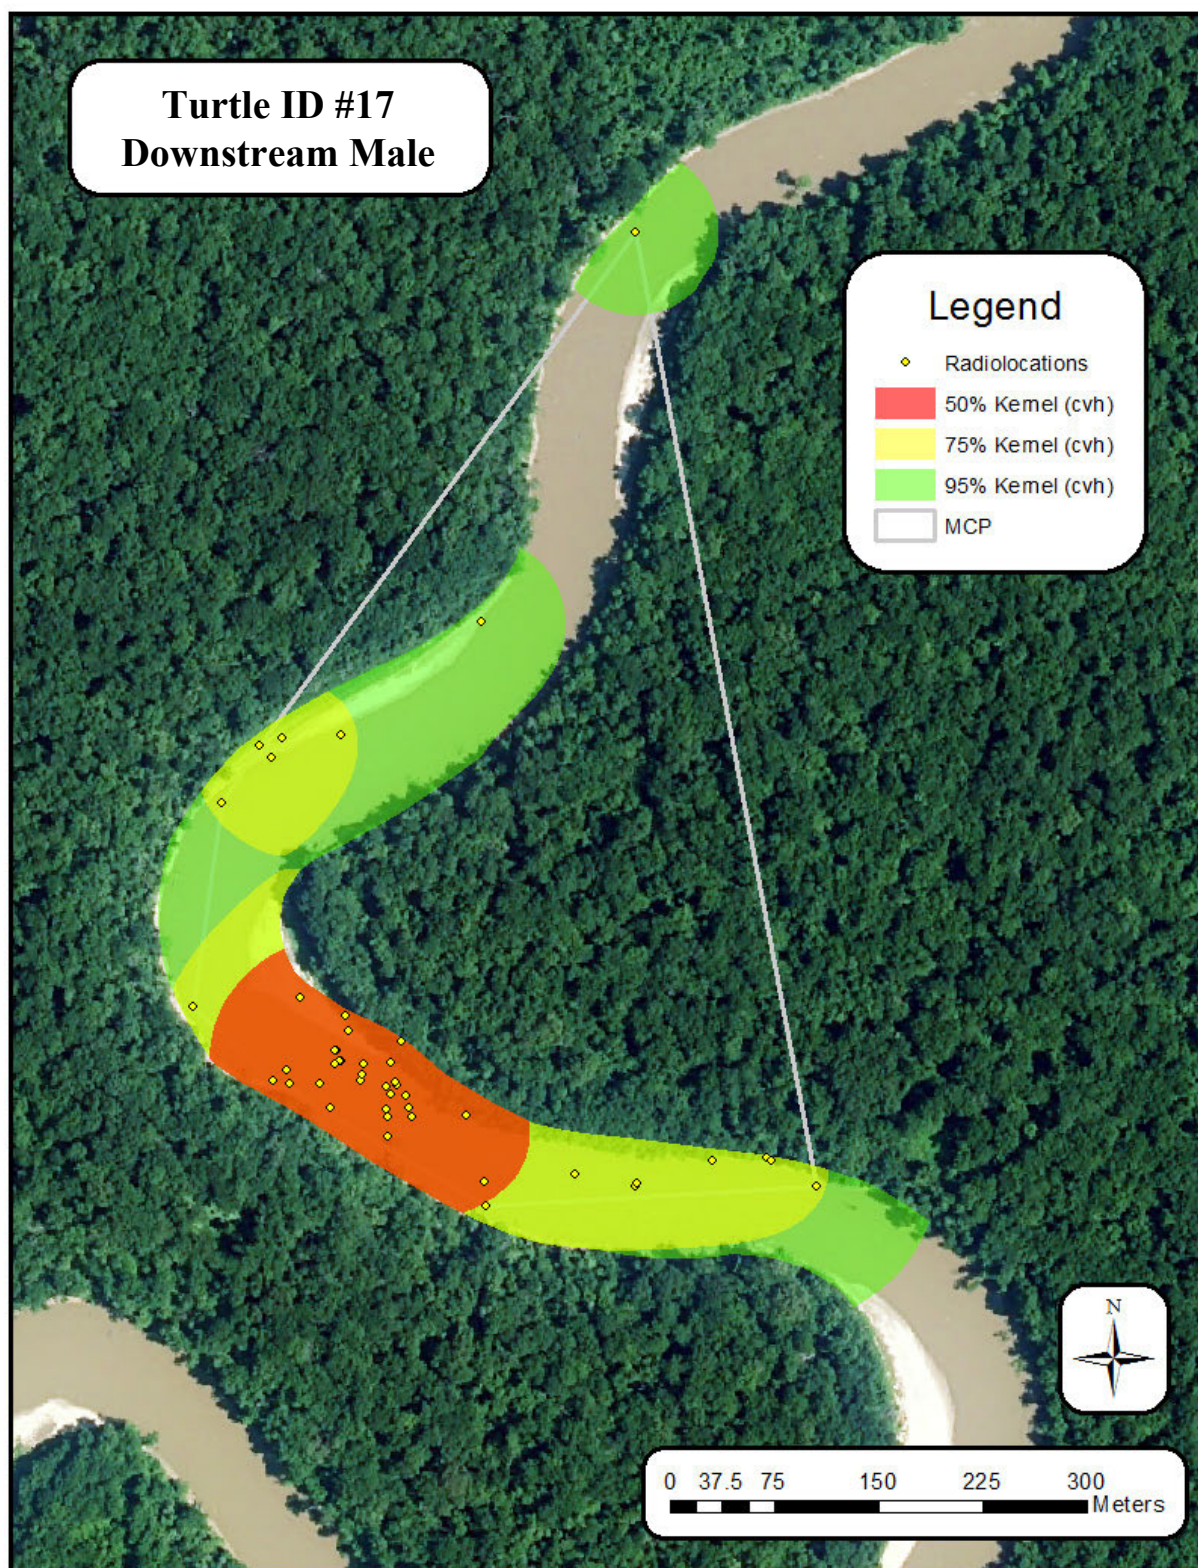

**Figure S1.15:** Downstream male *A. mutica* #17



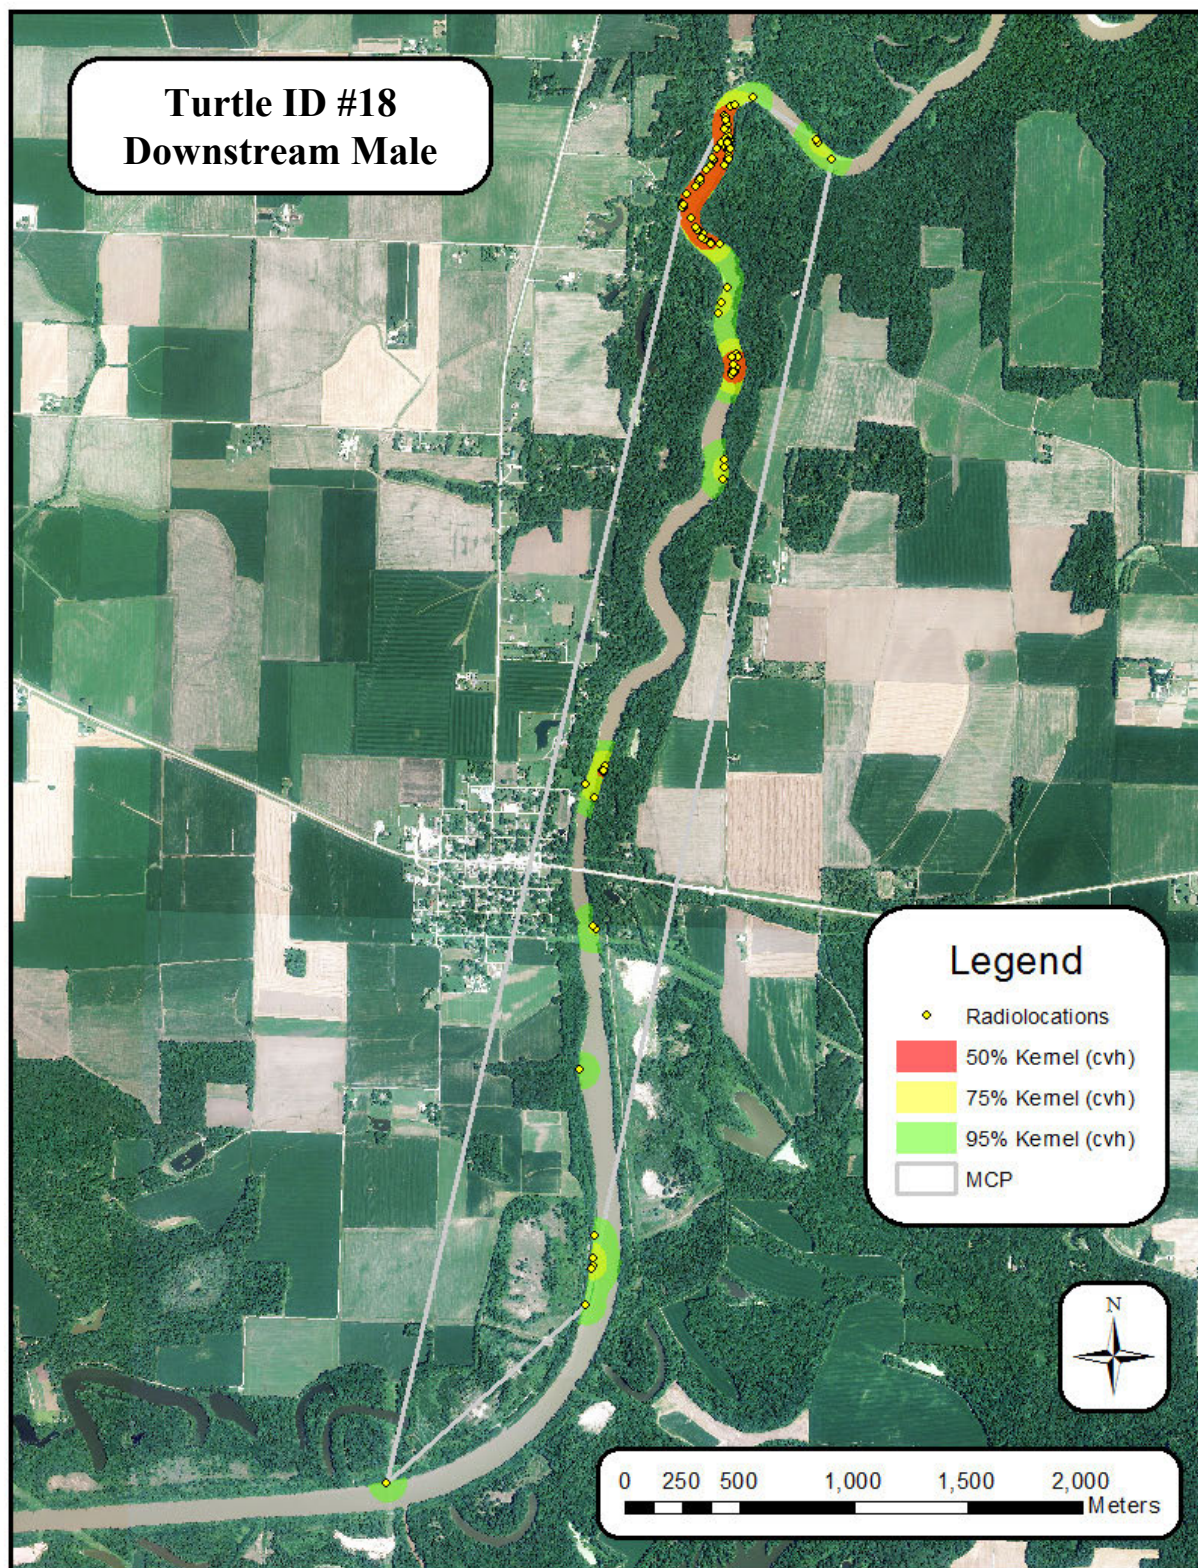

**Figure S1.16:** Downstream male *A. mutica* #18



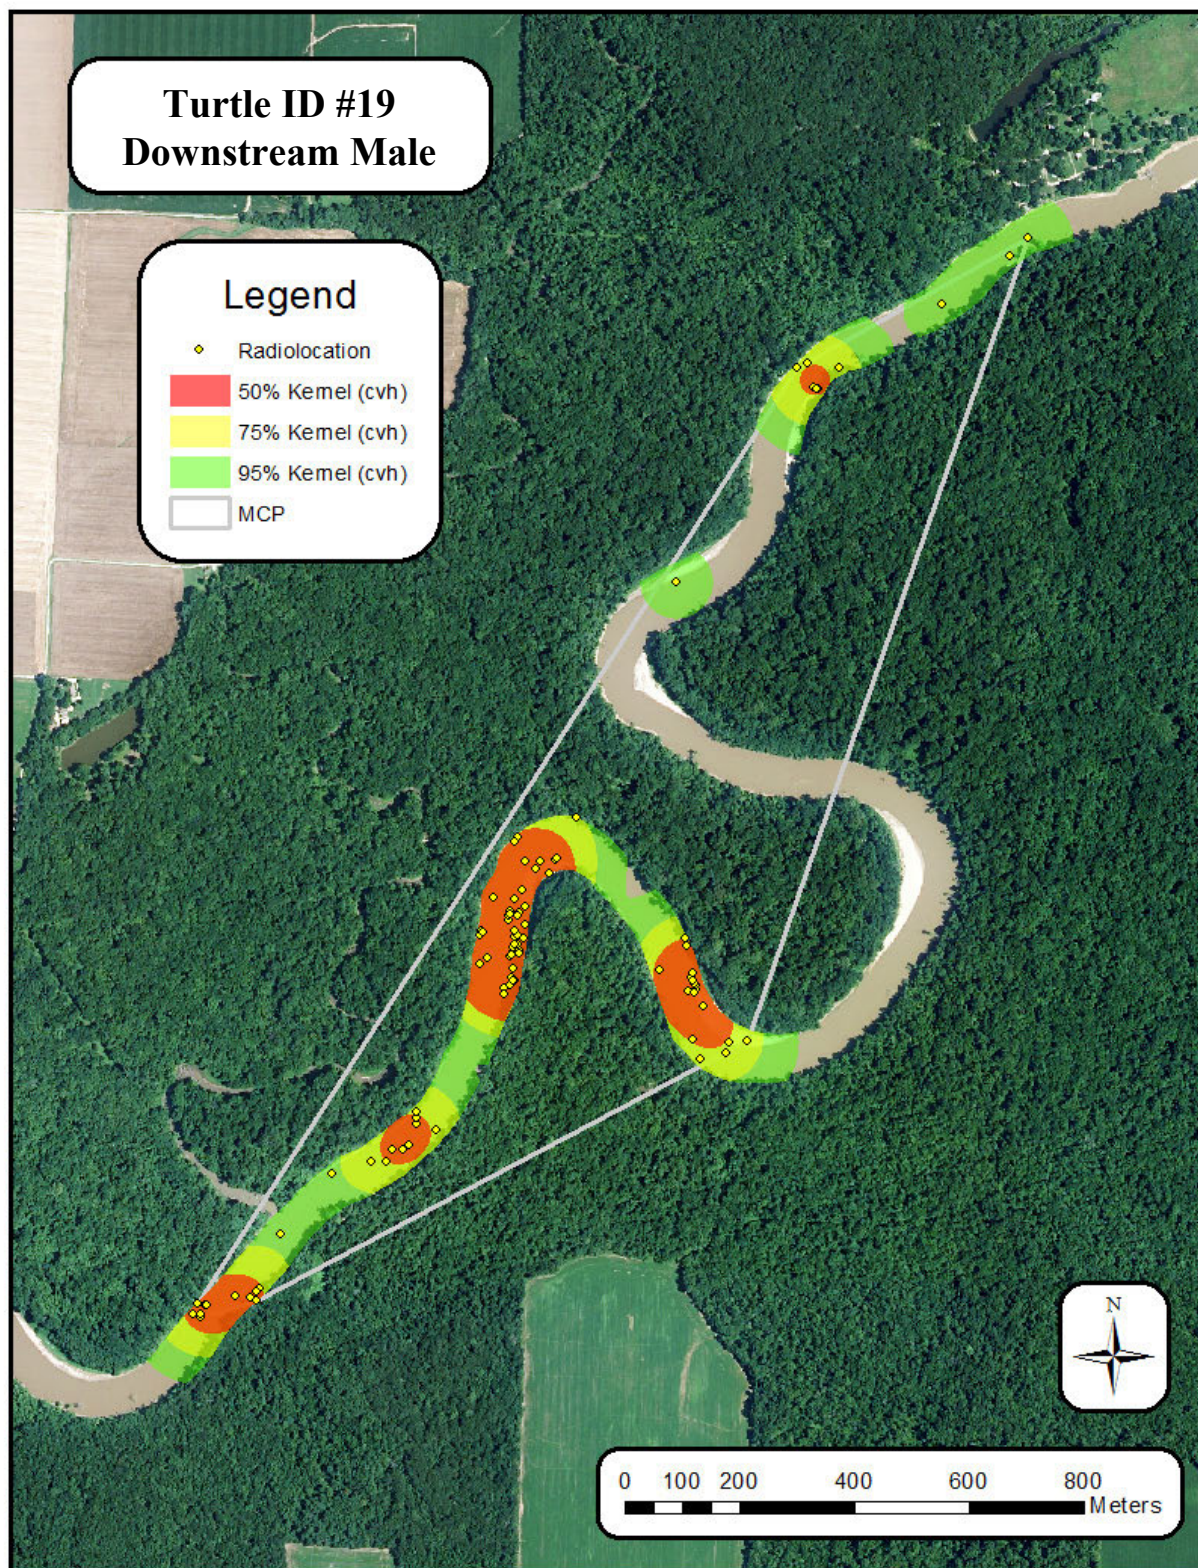

Figure S1.17: Downstream male *A. mutica* #19



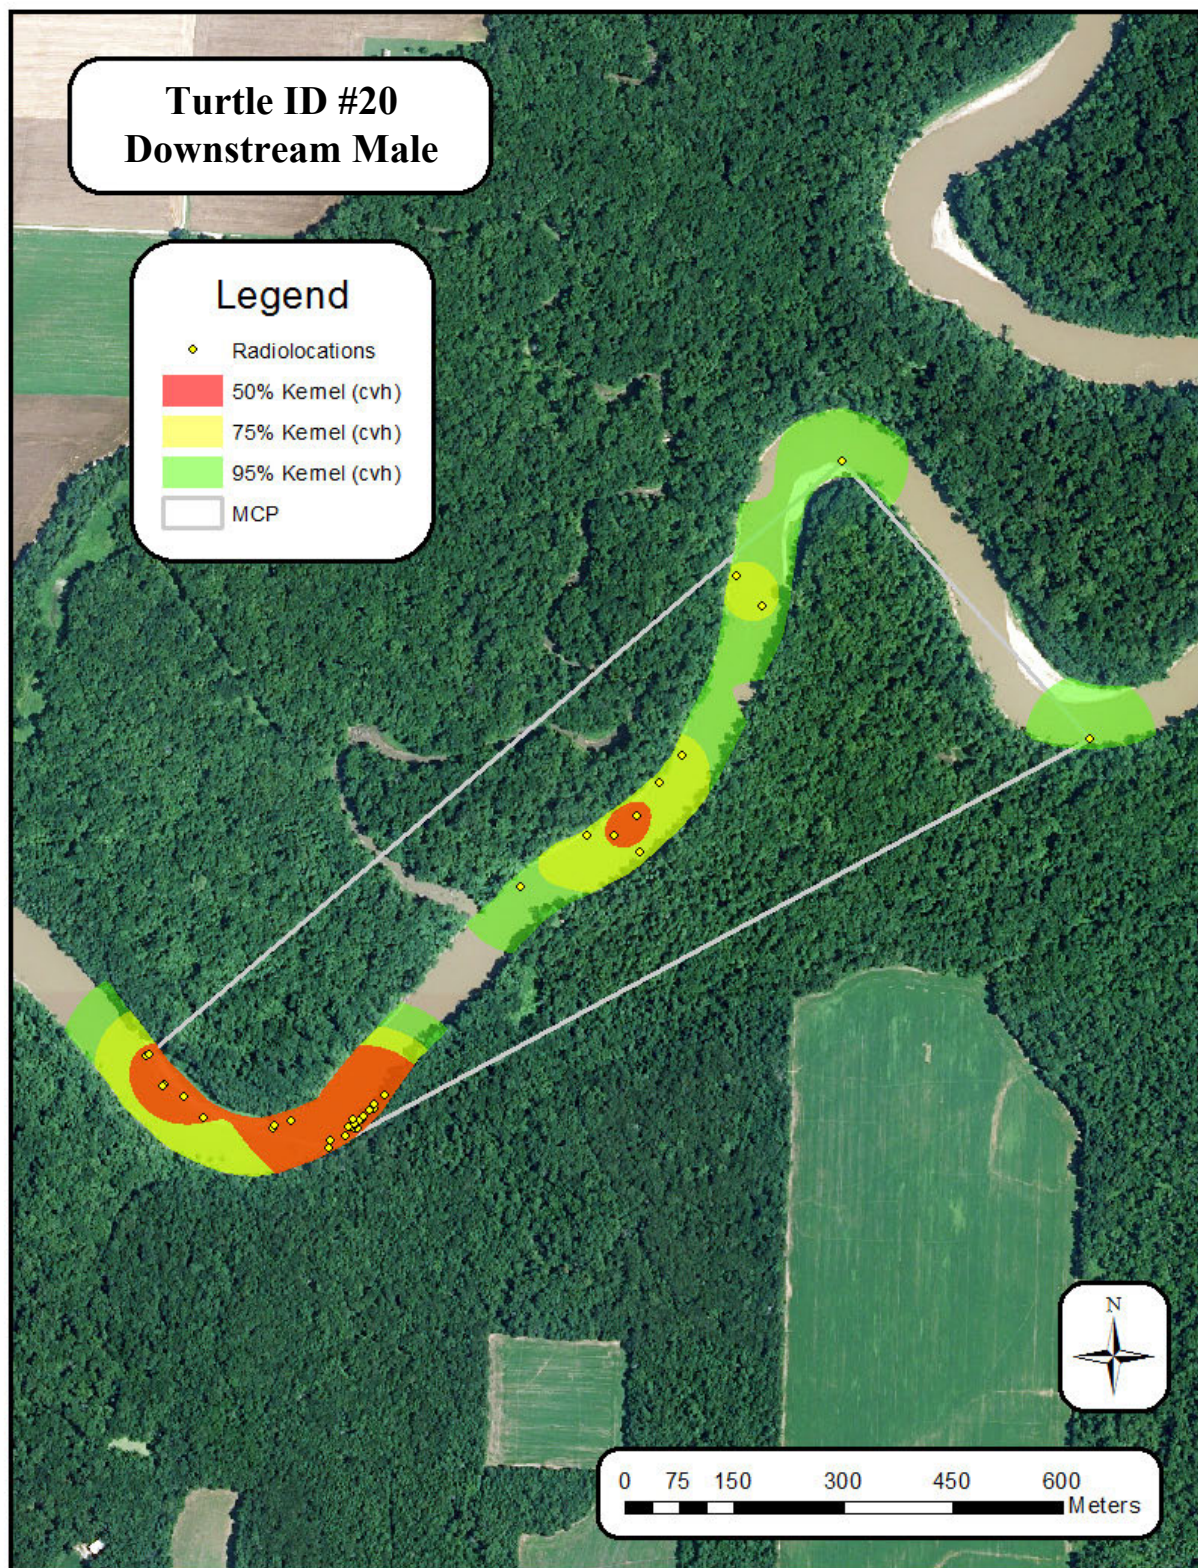

**Figure S1.18:** Downstream male *A. mutica* #20



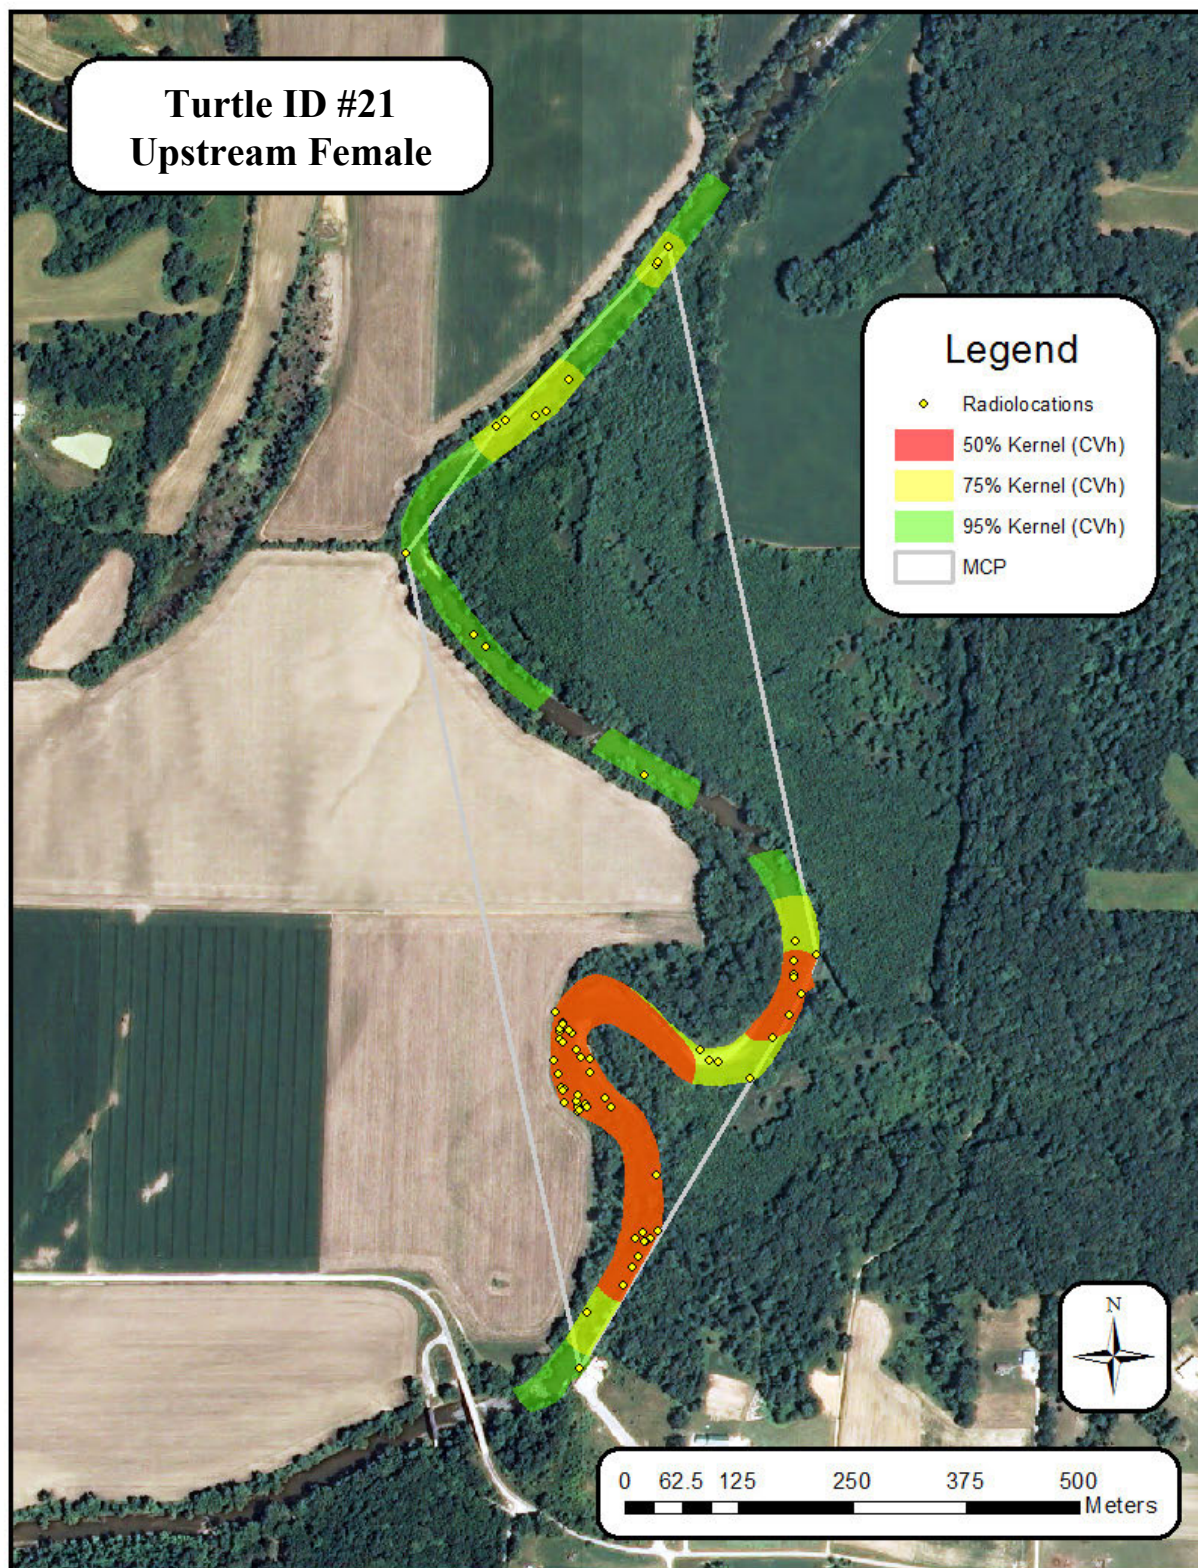

**Figure S1.19:** Upstream female *A. mutica* #21



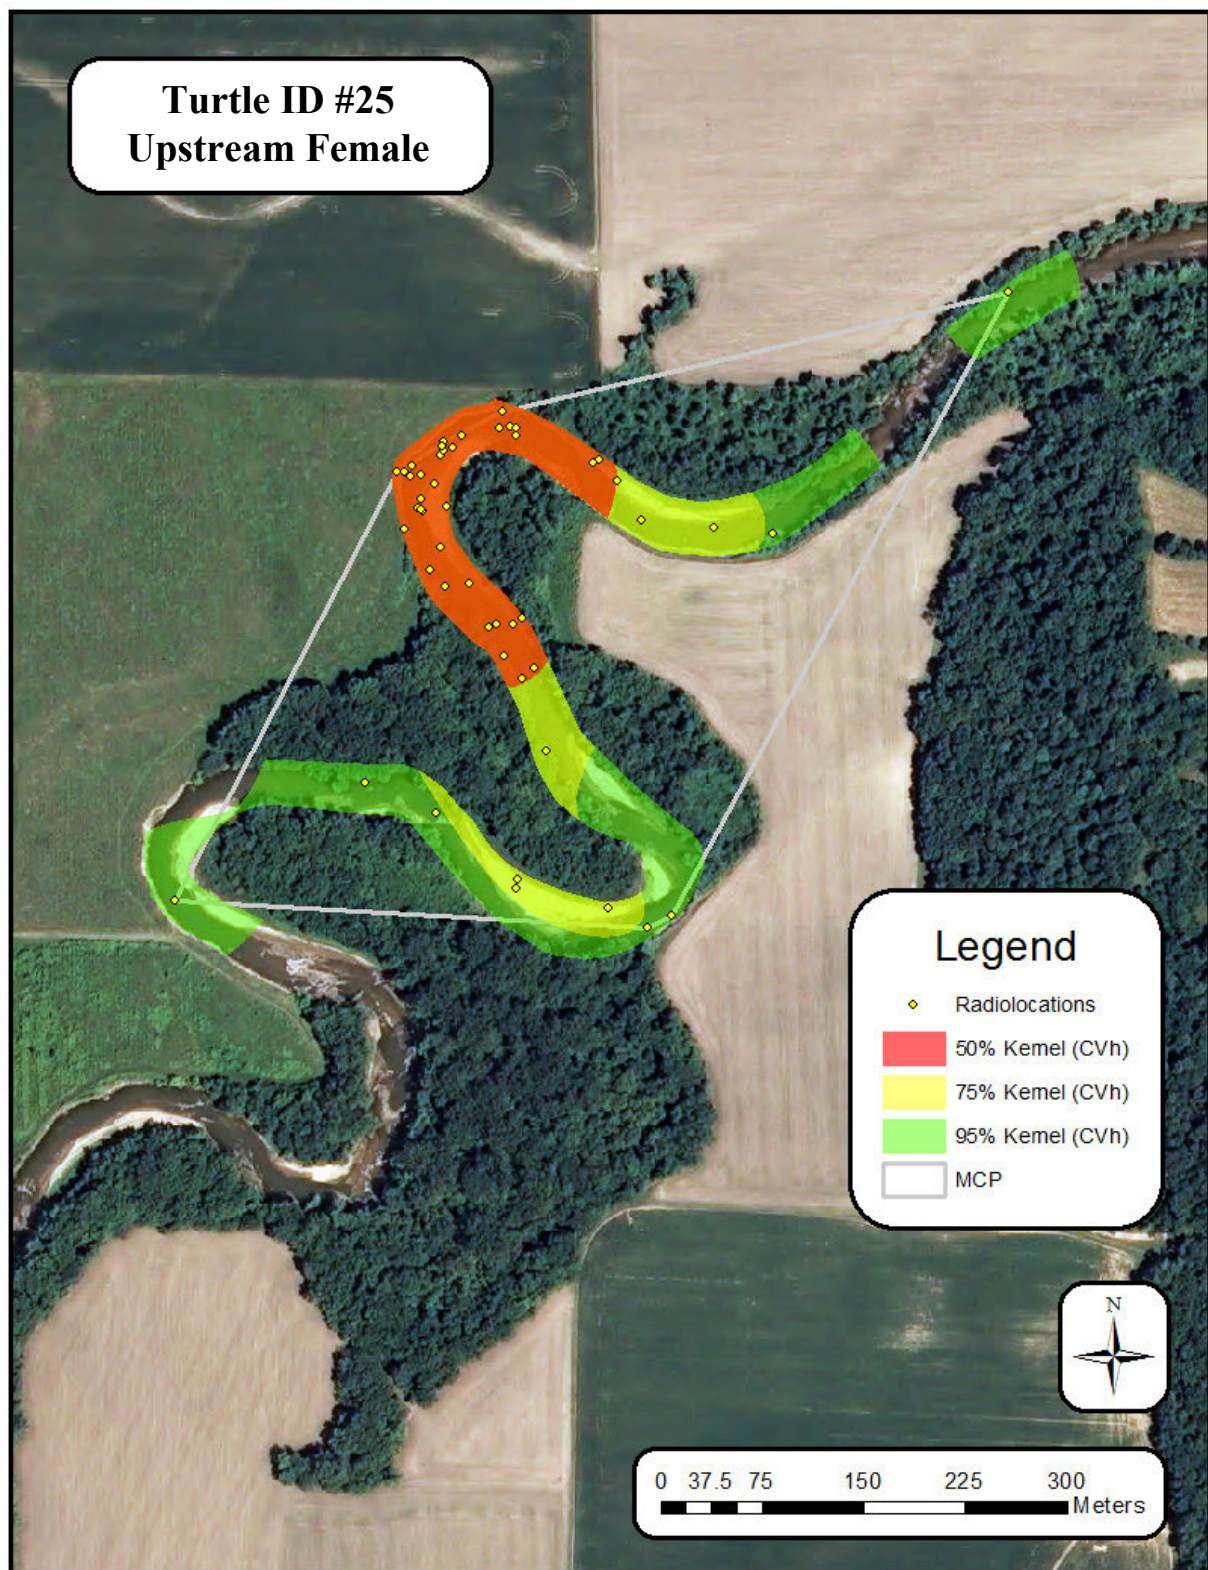

**Figure S1.20:** Upstream female *A. mutica* #25



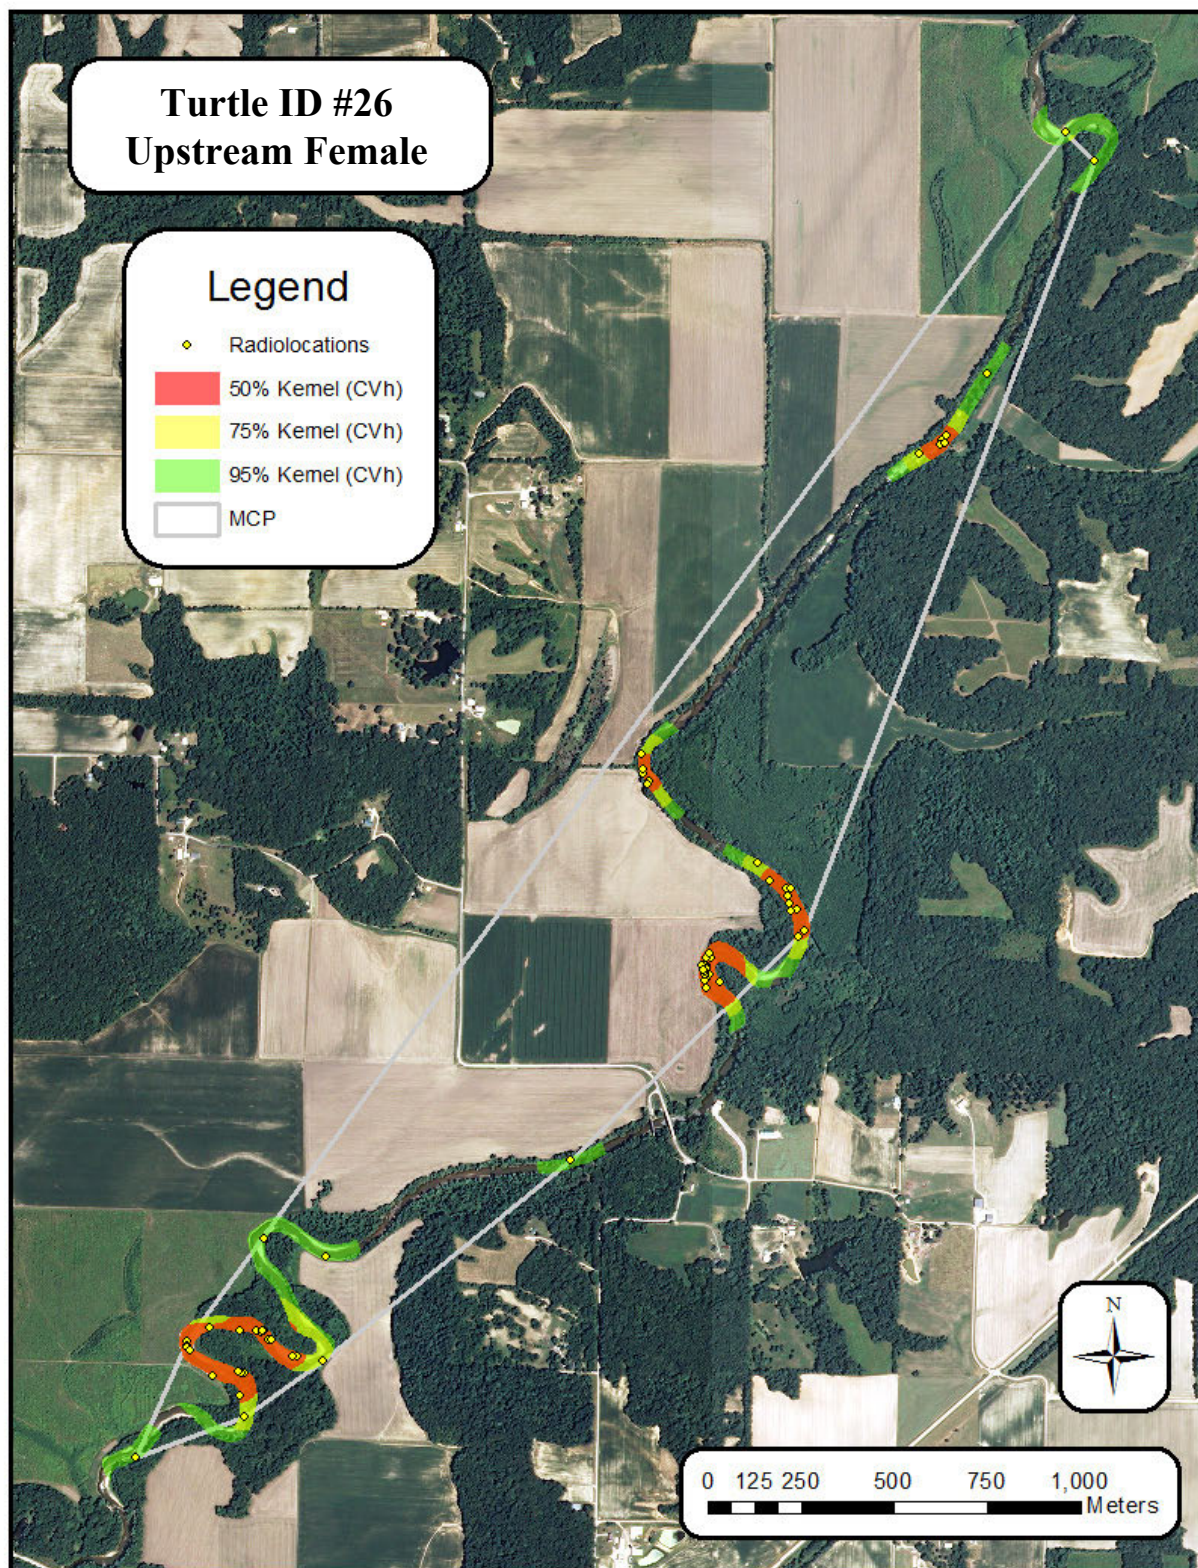

**Figure S1.21:** Upstream female *A. mutica* #26



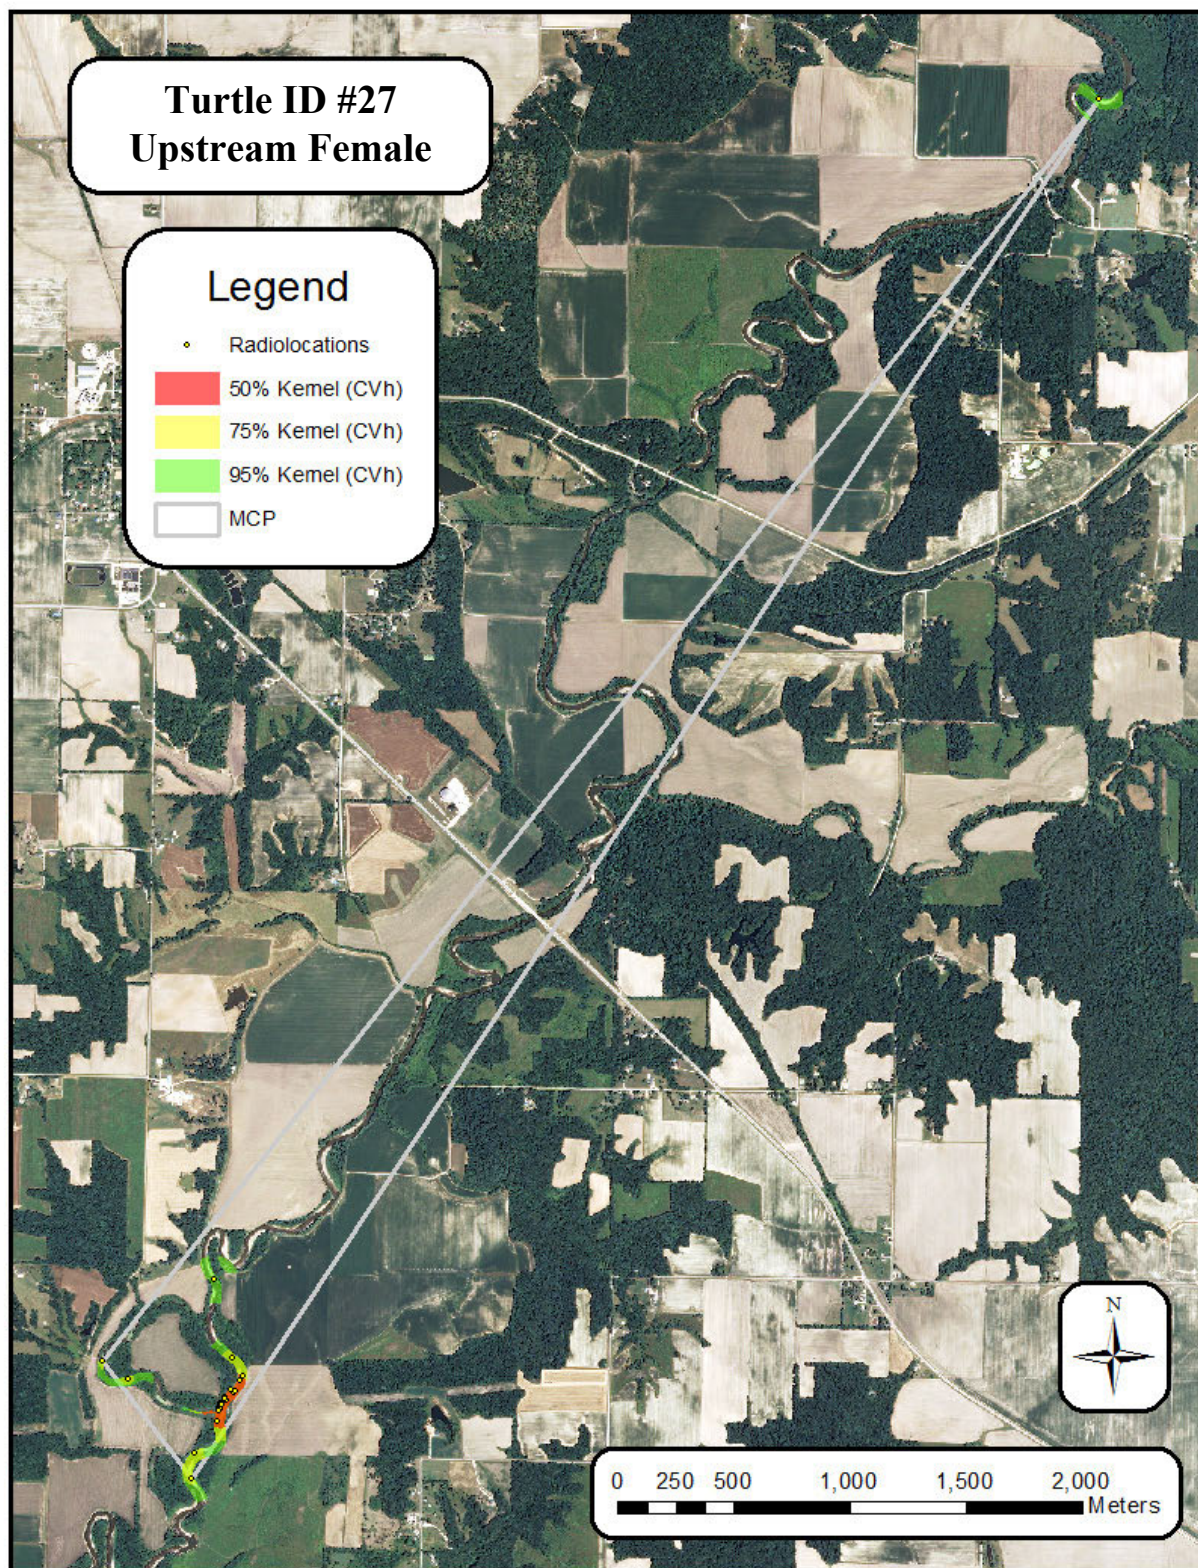

**Figure S1.22:** Upstream female *A. mutica* #27



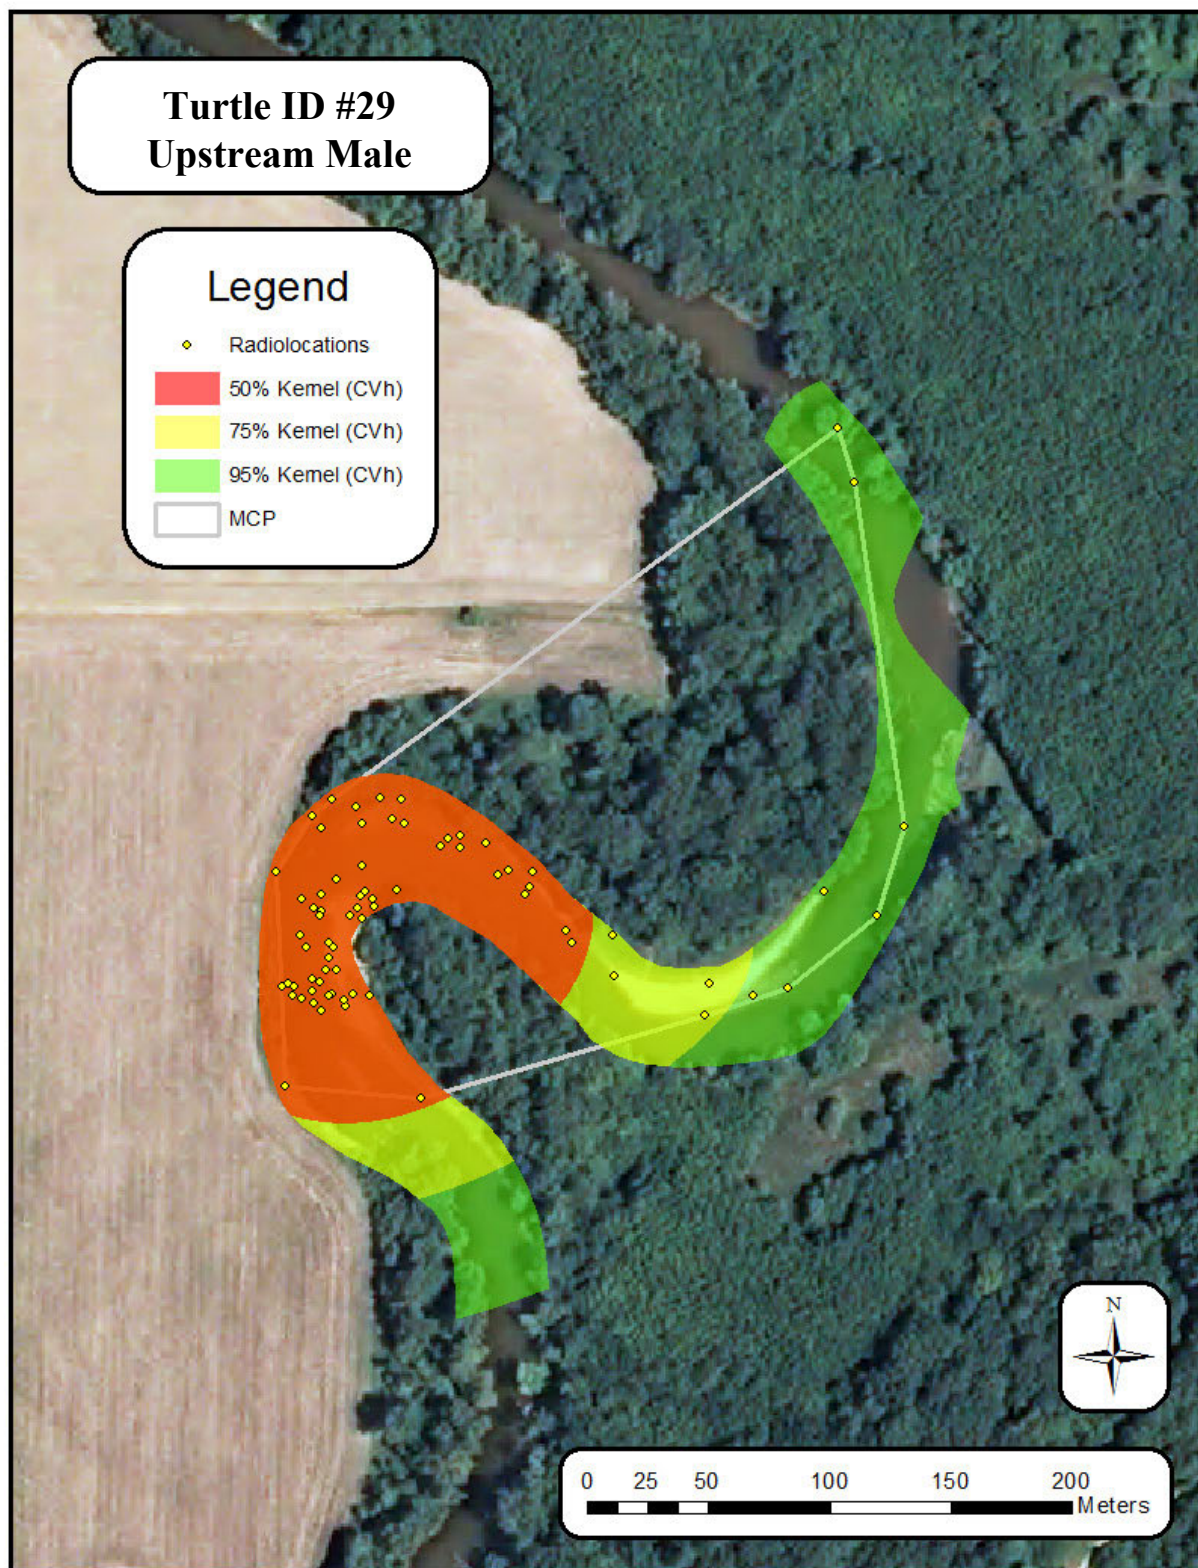

**Figure S1.23:** Upstream male *A. mutica* #29



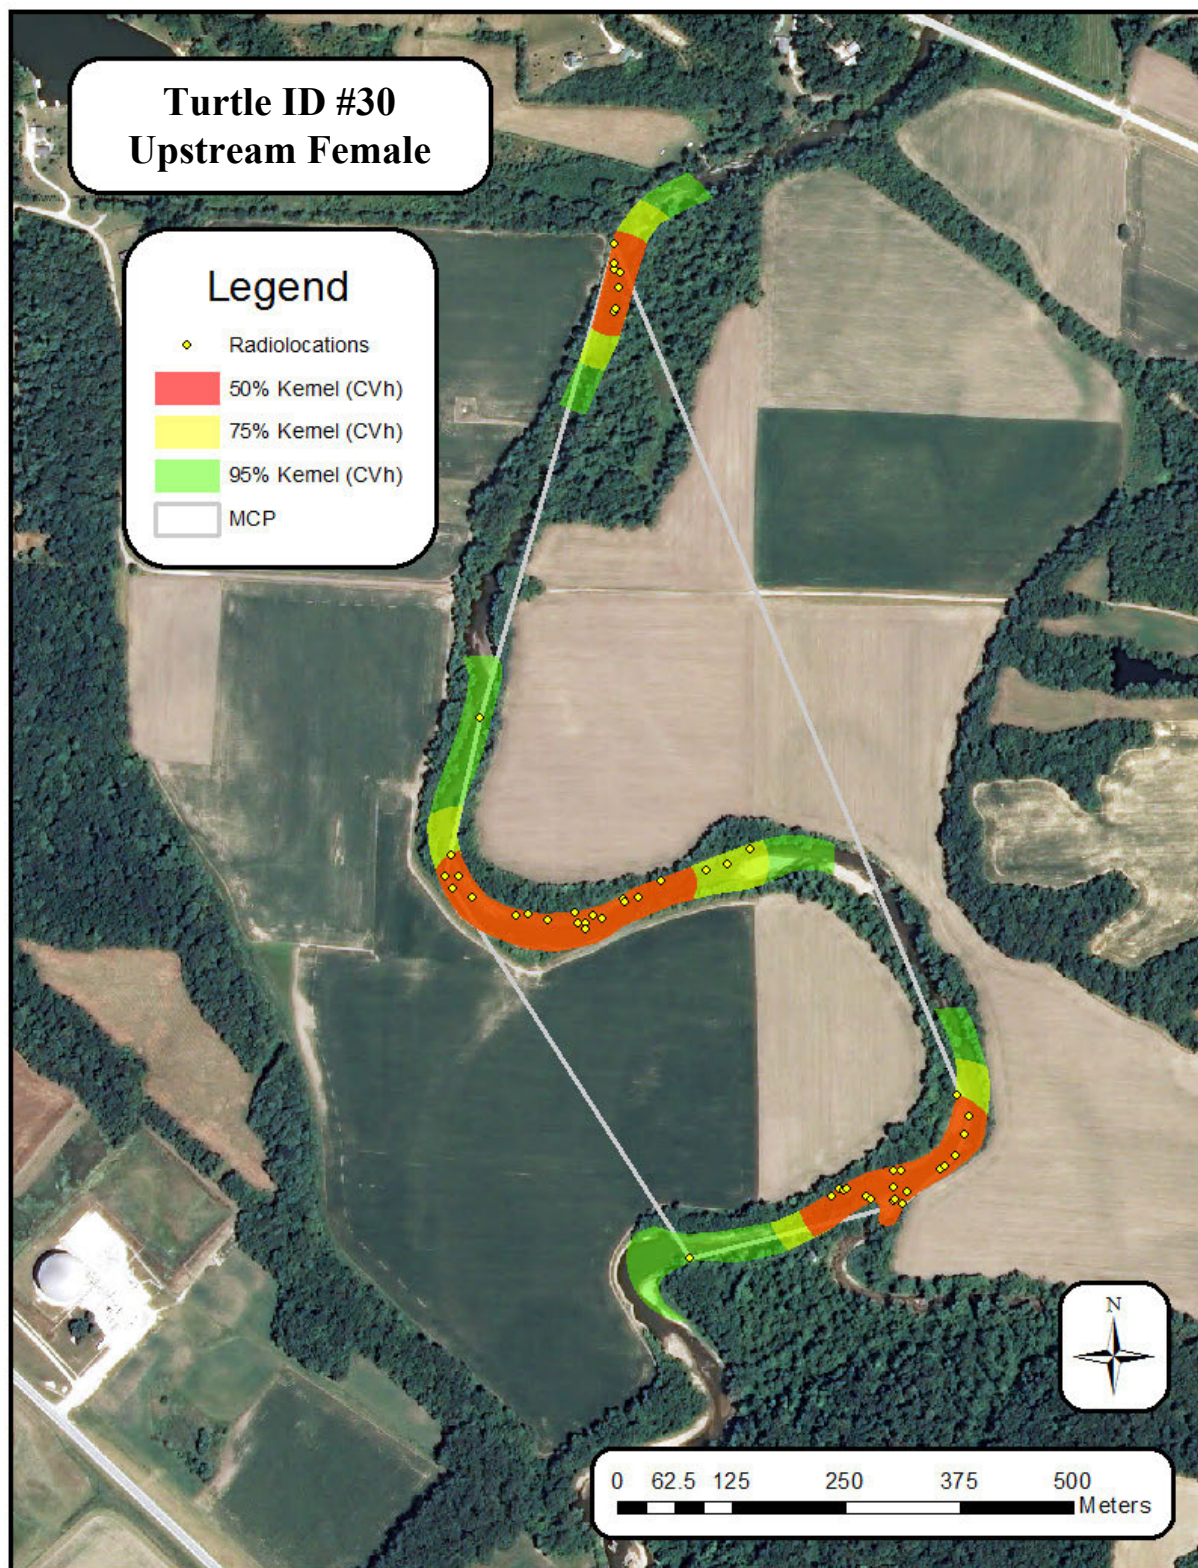

**Figure S1.24:** Upstream female *A. mutica* #30



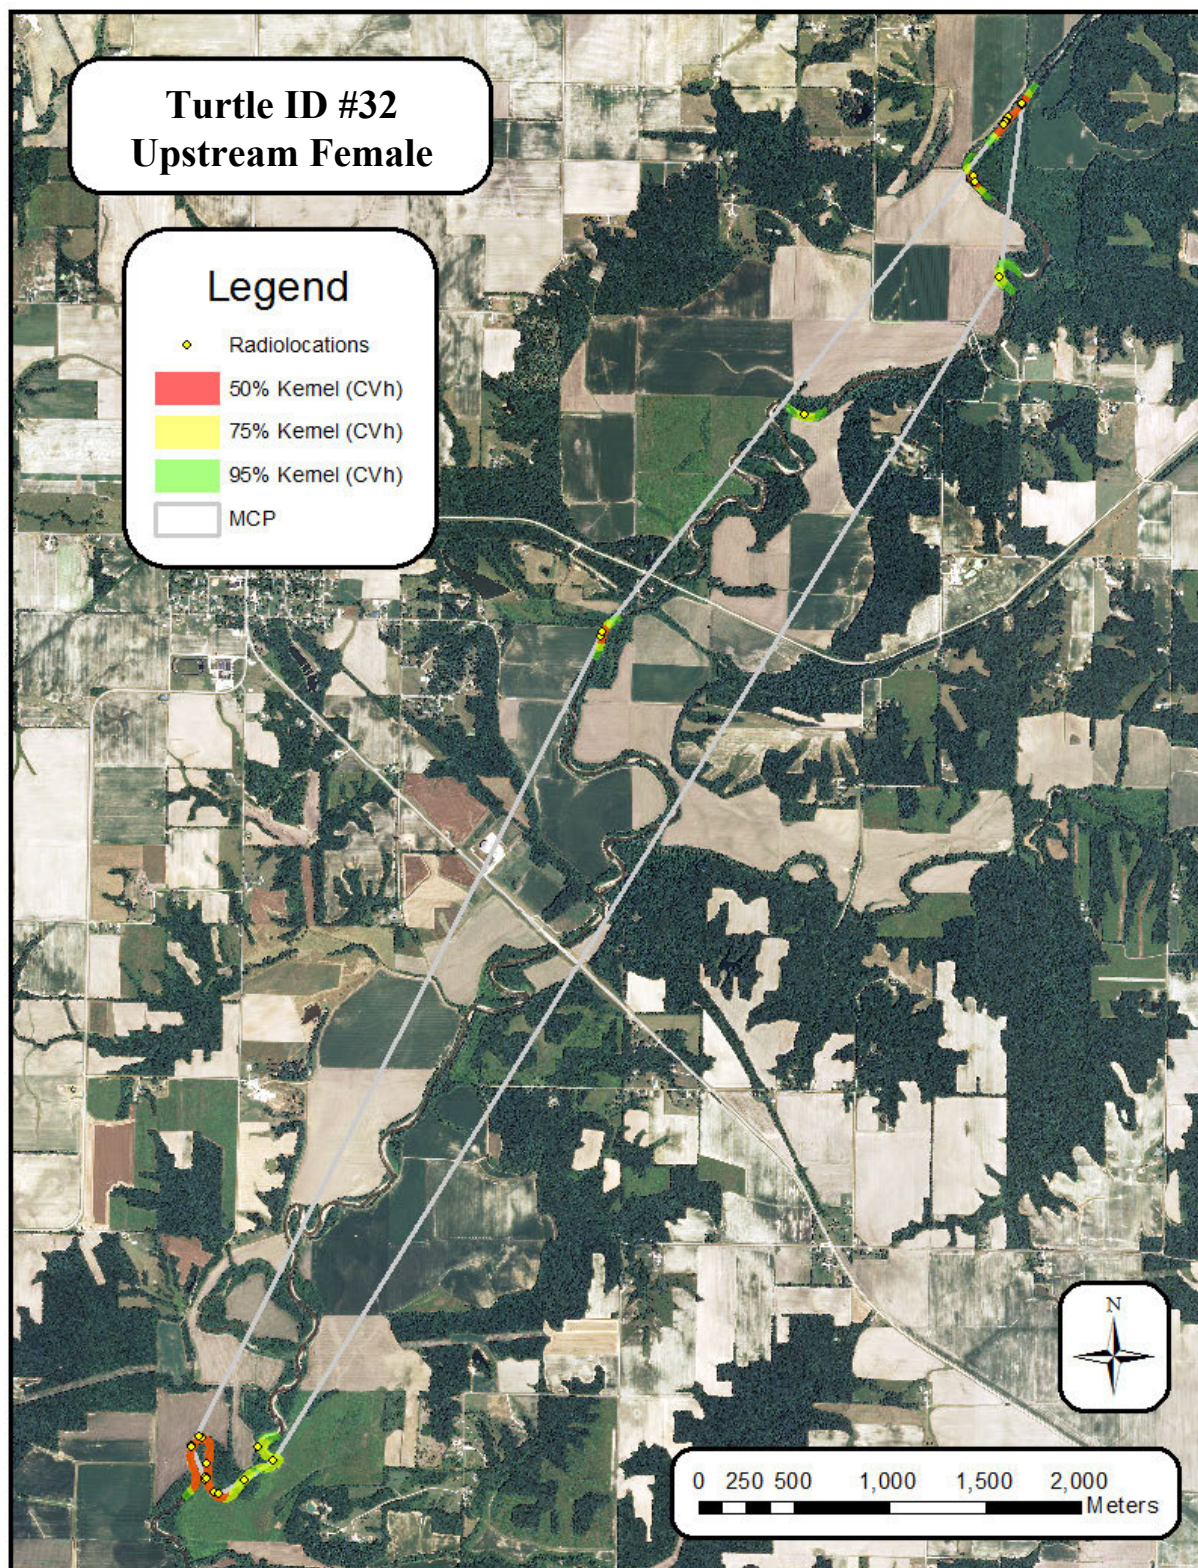

Figure S1.25: Upstream female *A. mutica* #32



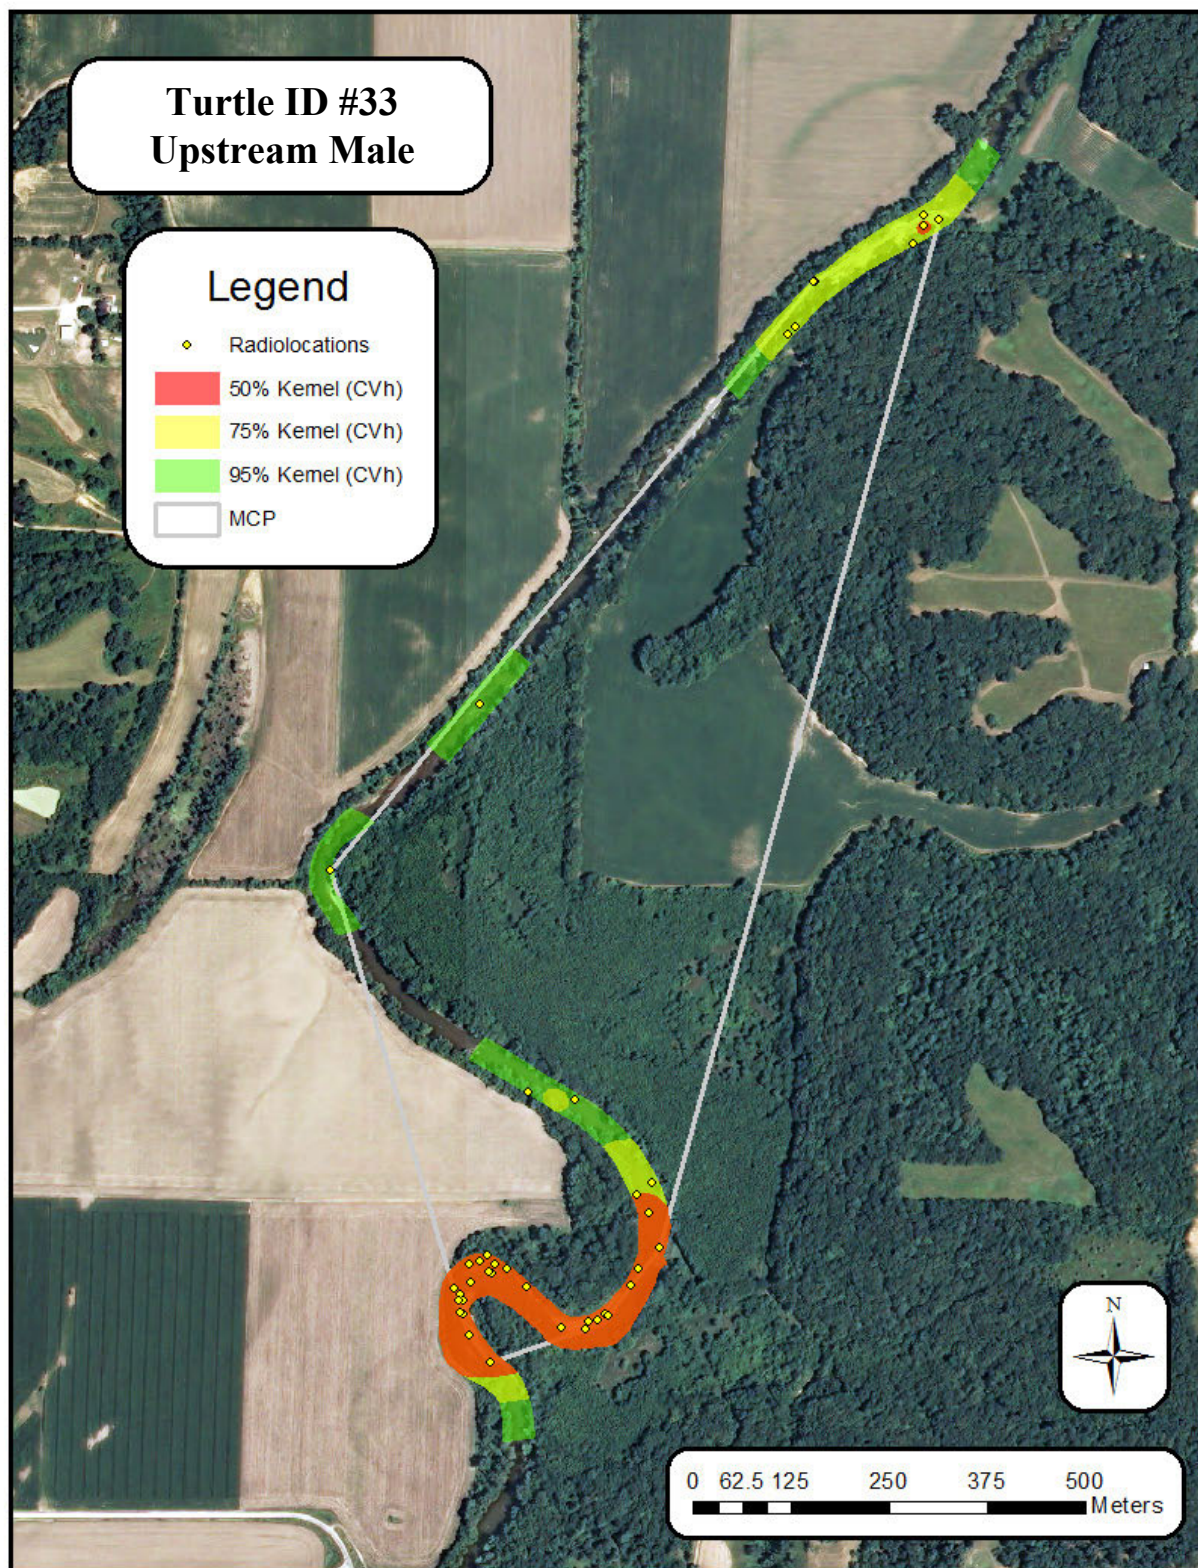

Figure S1.26: Upstream male *A. mutica* #33



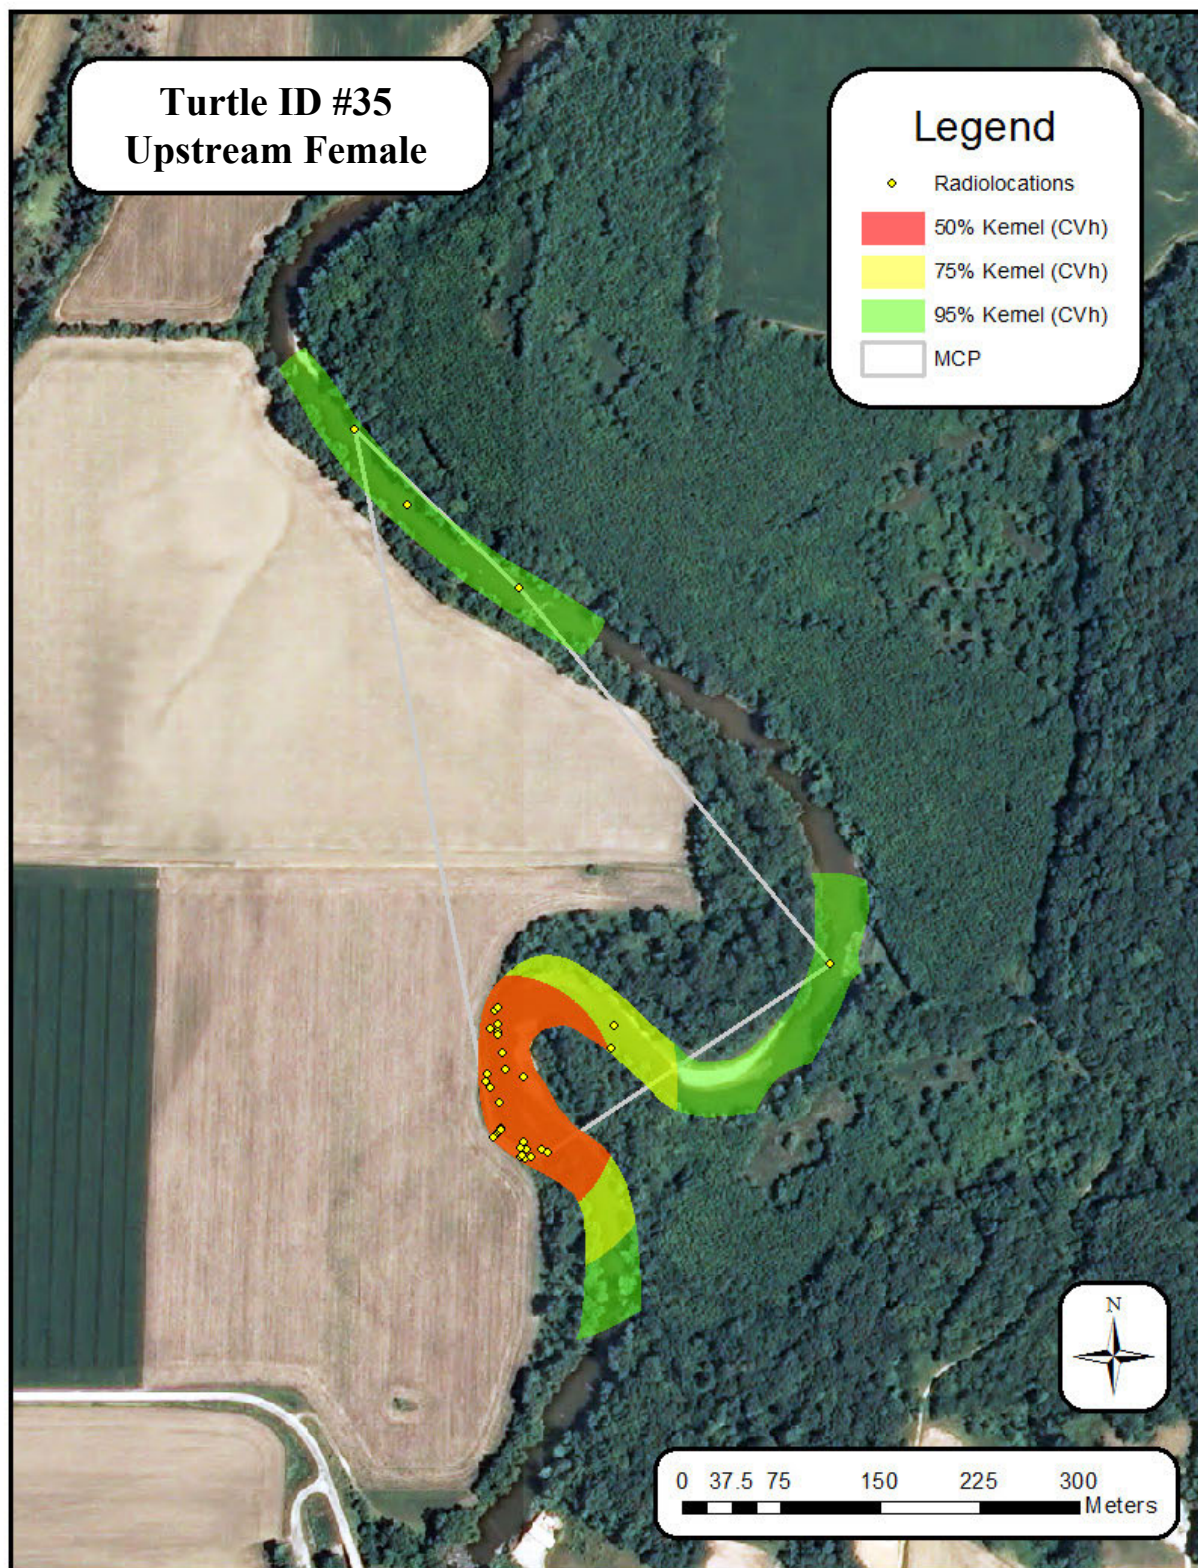

**Figure S1.27:** Upstream female *A. mutica* #35



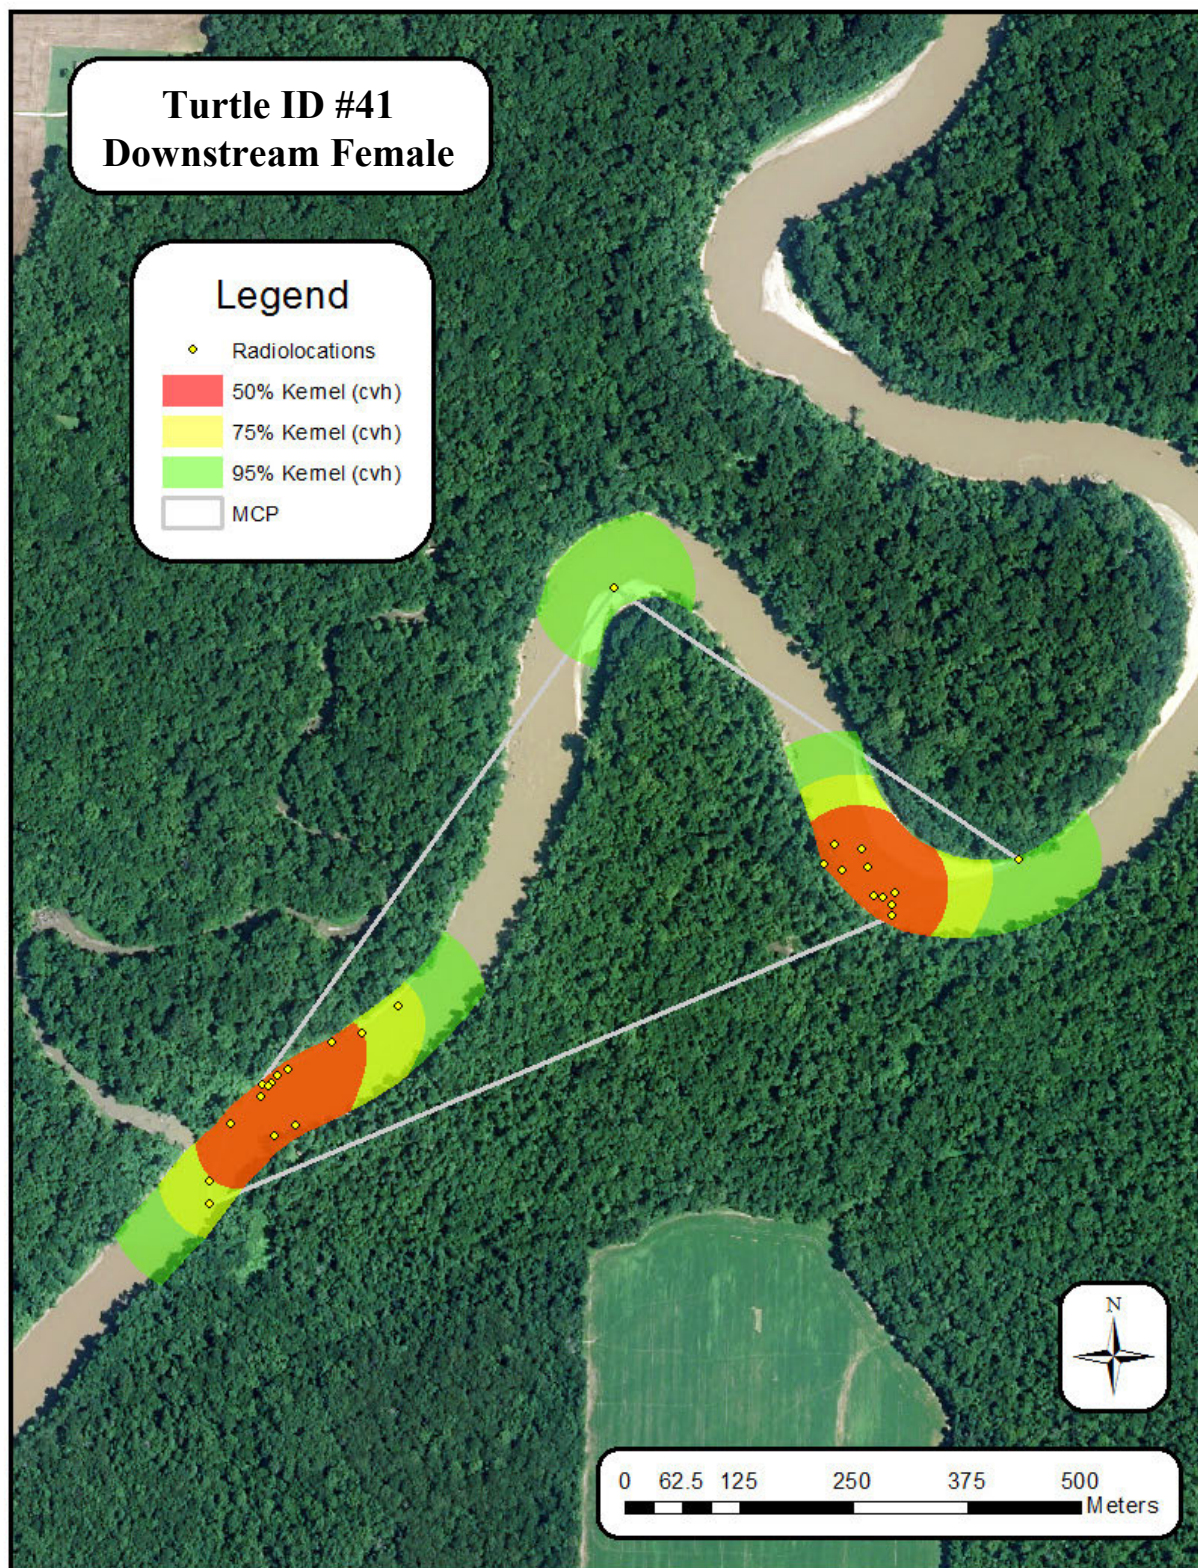

**Figure S1.28:** Downstream female *A. mutica* #41



**Figure S2.** Bootstrapped KDE home range size curves.

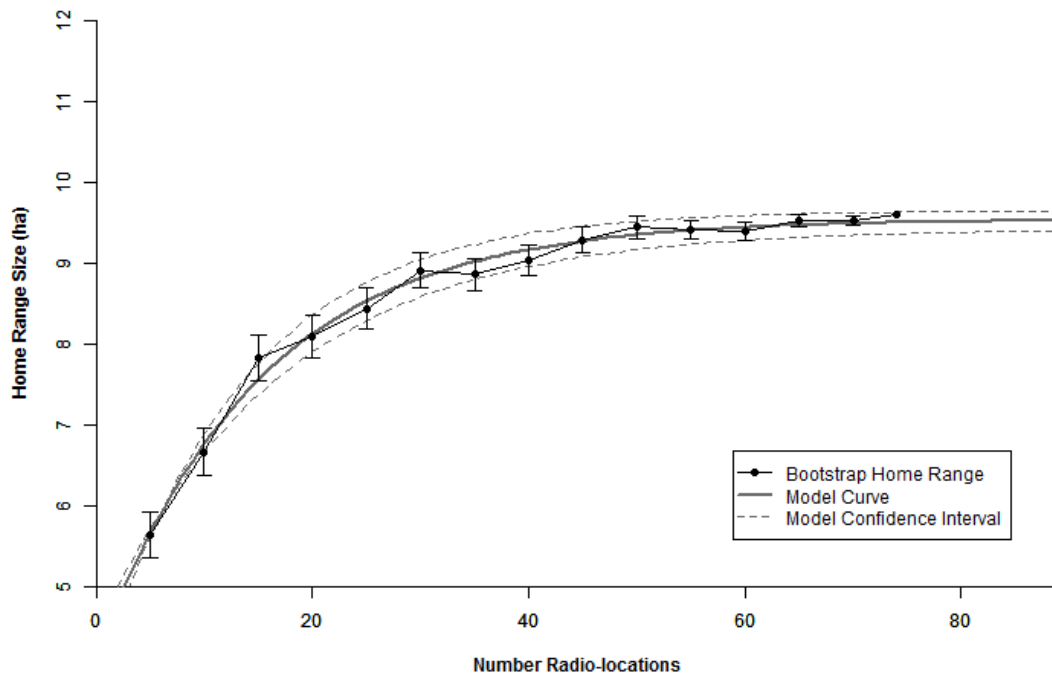

**Figure S2.1:** Downstream female *A. mutica* #1

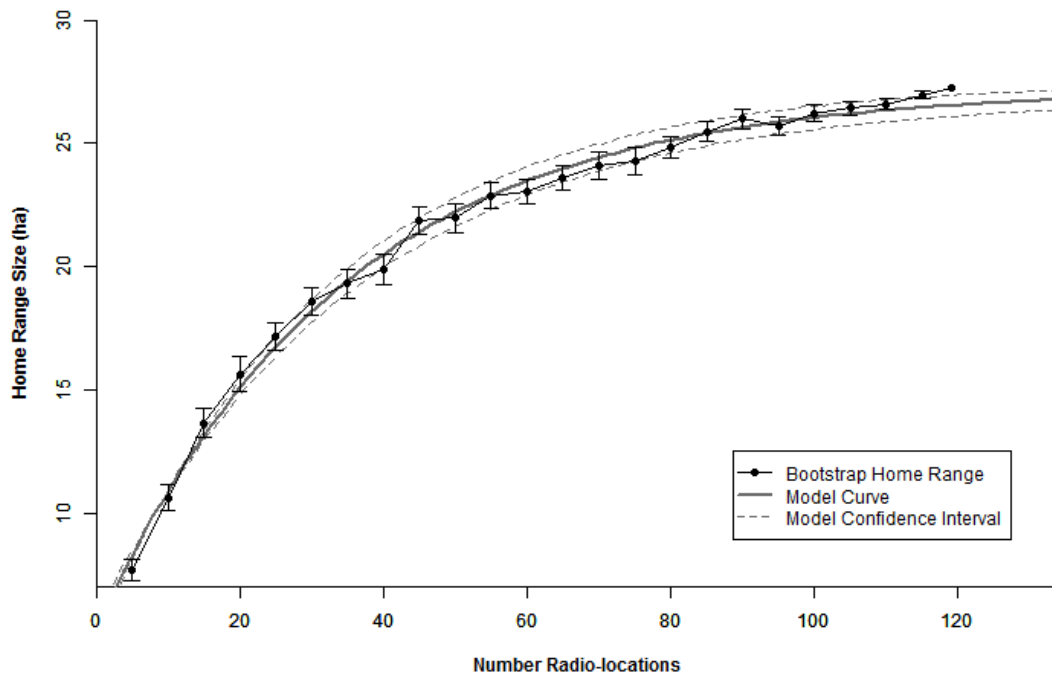

**Figure S2.2:** Downstream male *A. mutica* #2



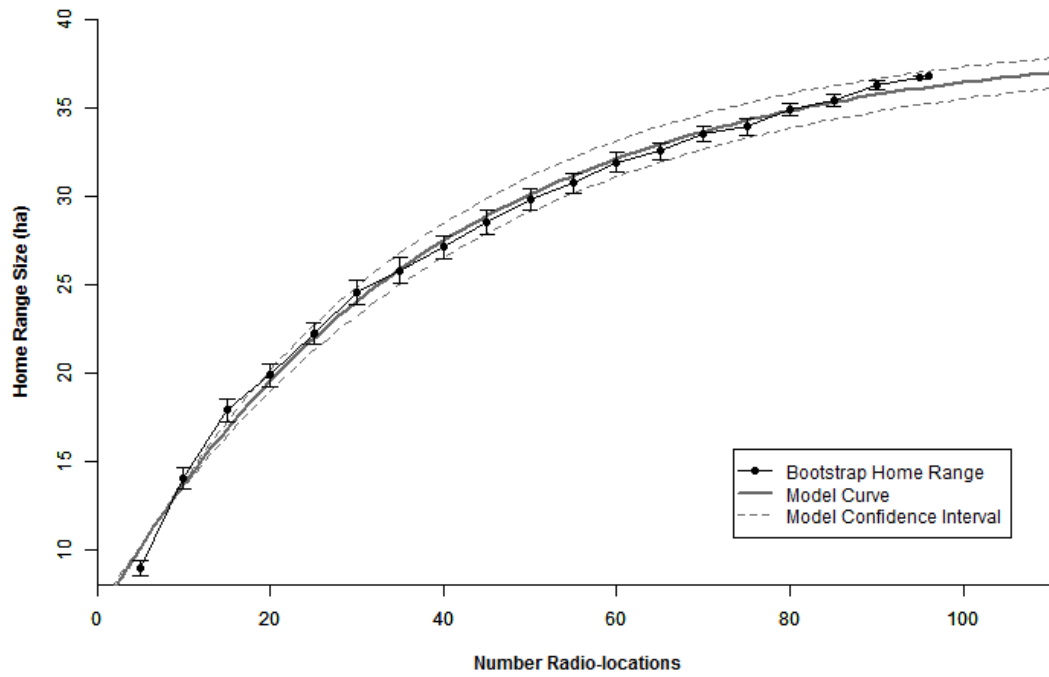

**Figure S2.3:** Downstream male *A. mutica* #4

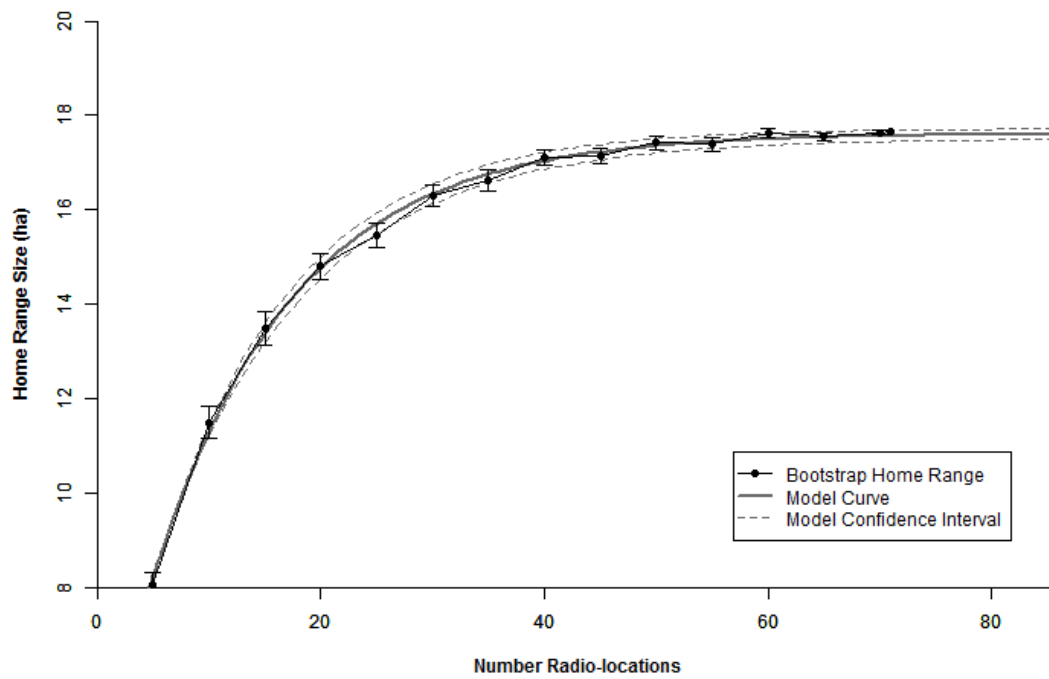

**Figure S2.4:** Downstream female *A. mutica* #5



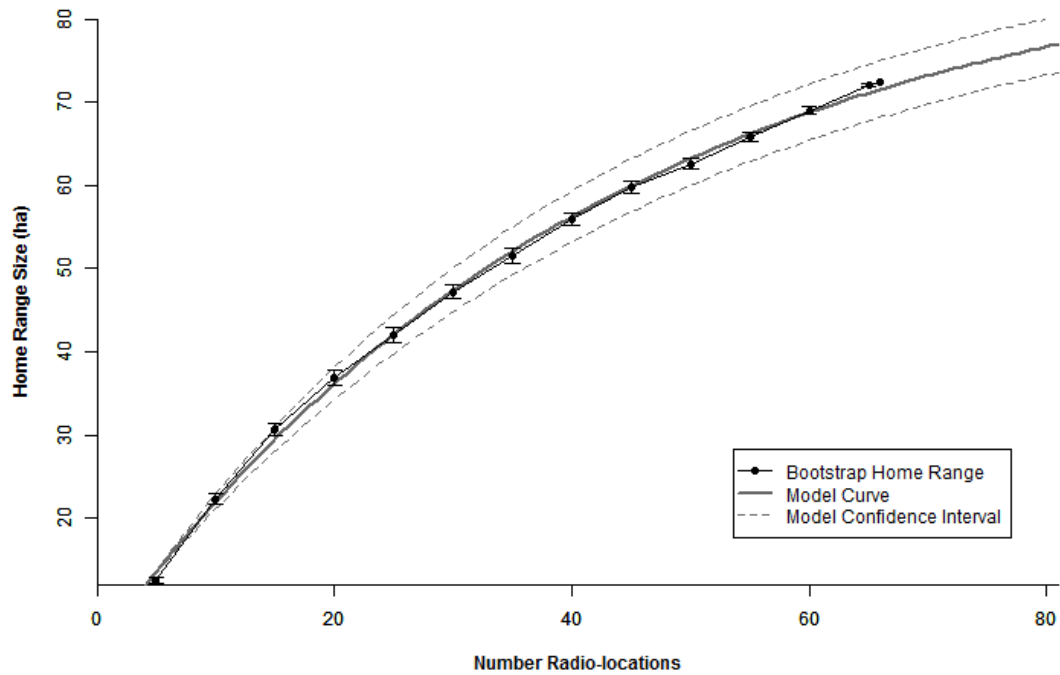

Figure S2.5: Downstream female *A. mutica* #6

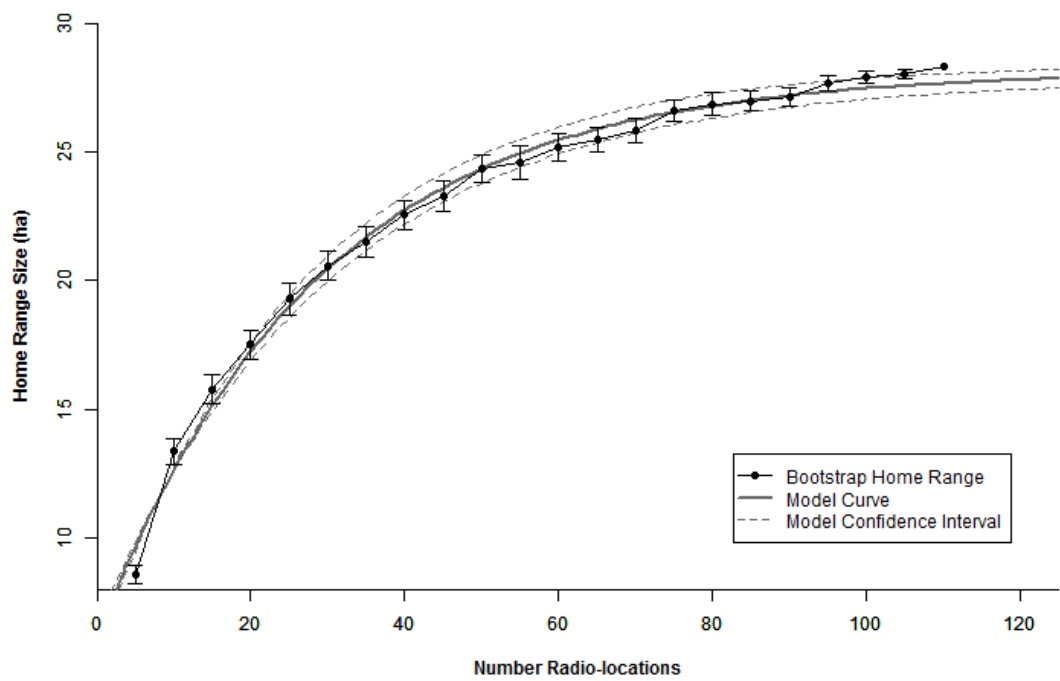

Figure S2.6: Downstream male *A. mutica* #8



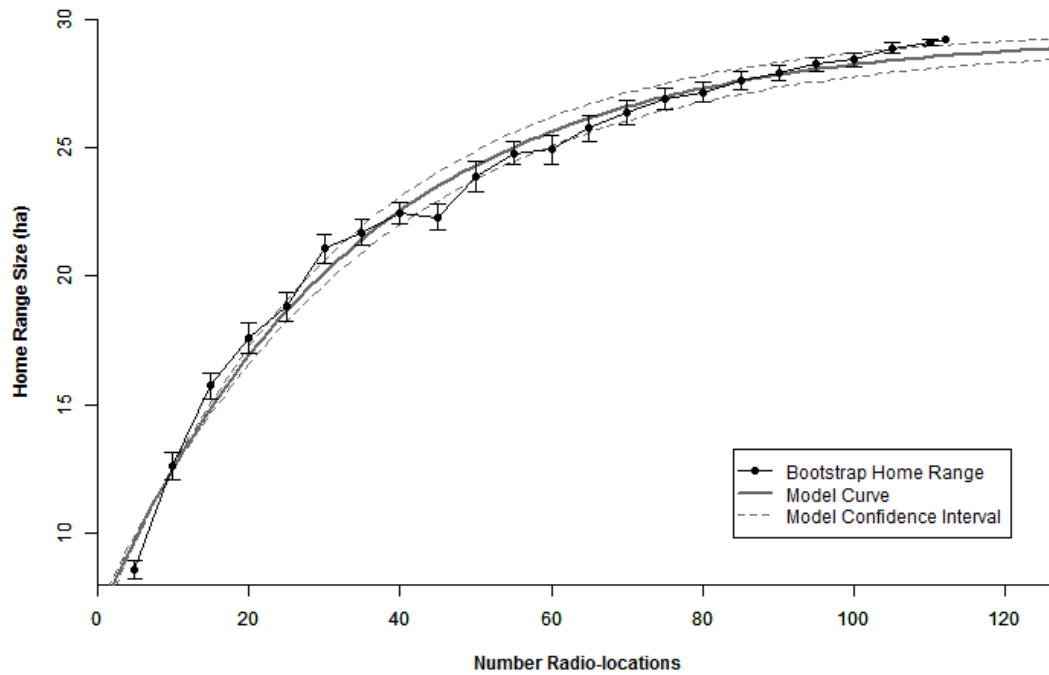

**Figure S2.7:** Downstream male *A. mutica* #9

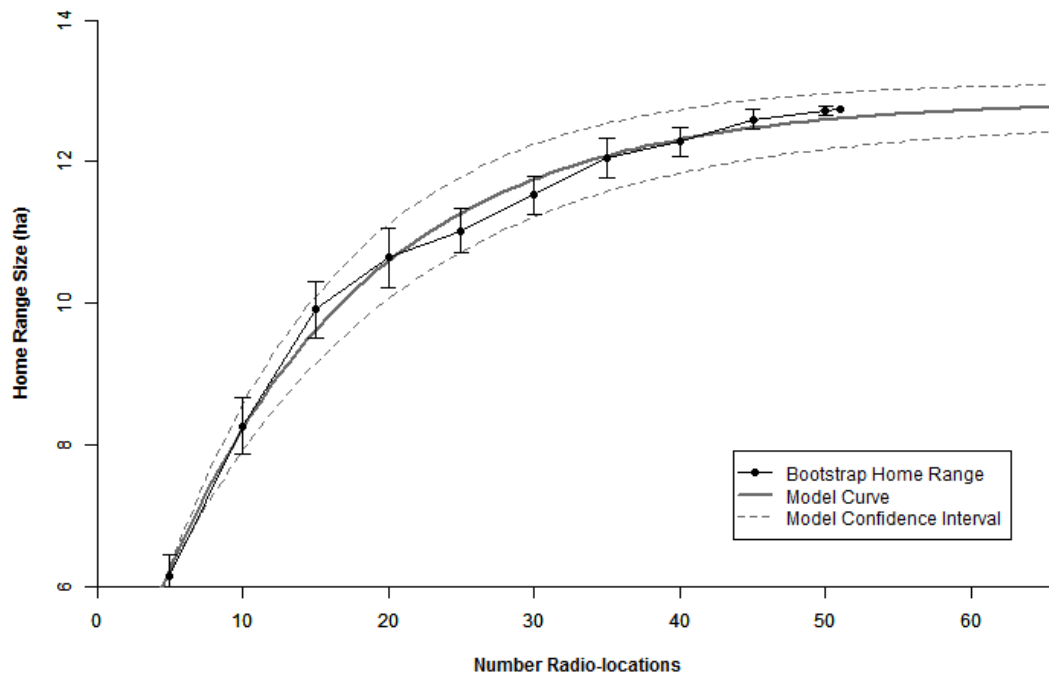

**Figure S2.8:** Downstream male *A. mutica* #10



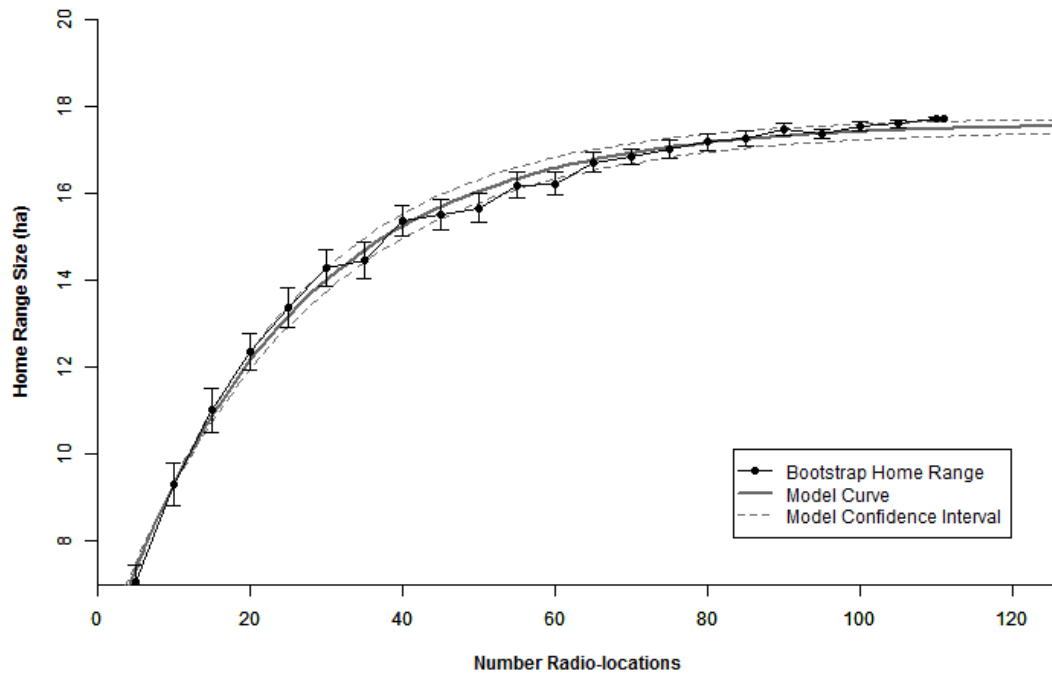

**Figure S2.9:** Downstream male *A. mutica* #11

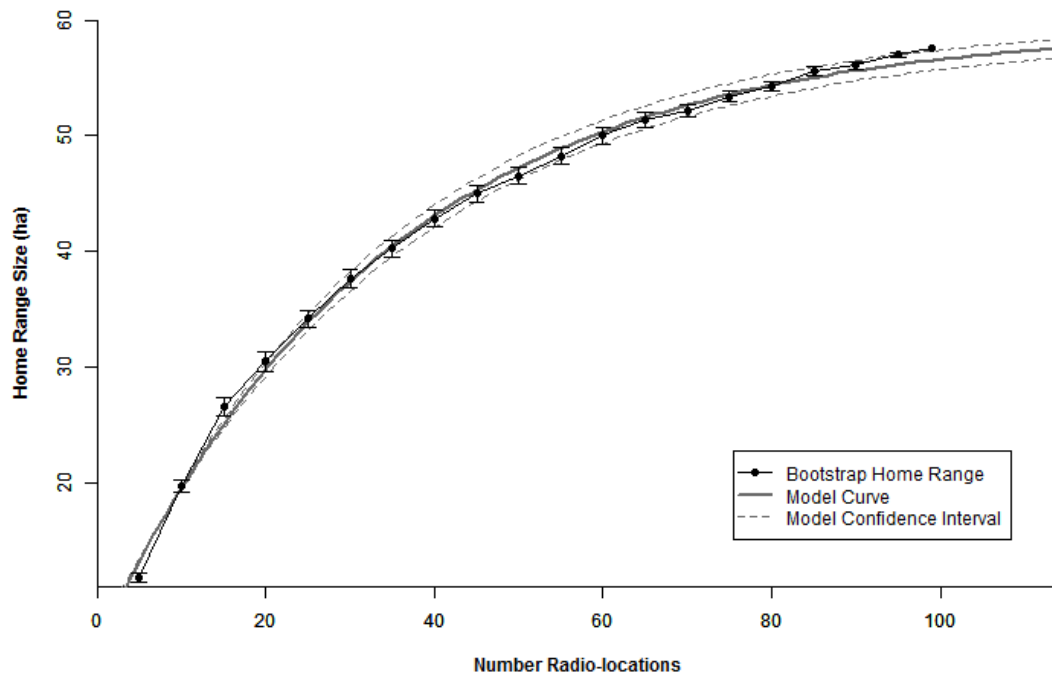

**Figure S2.10:** Downstream male *A. mutica* #12



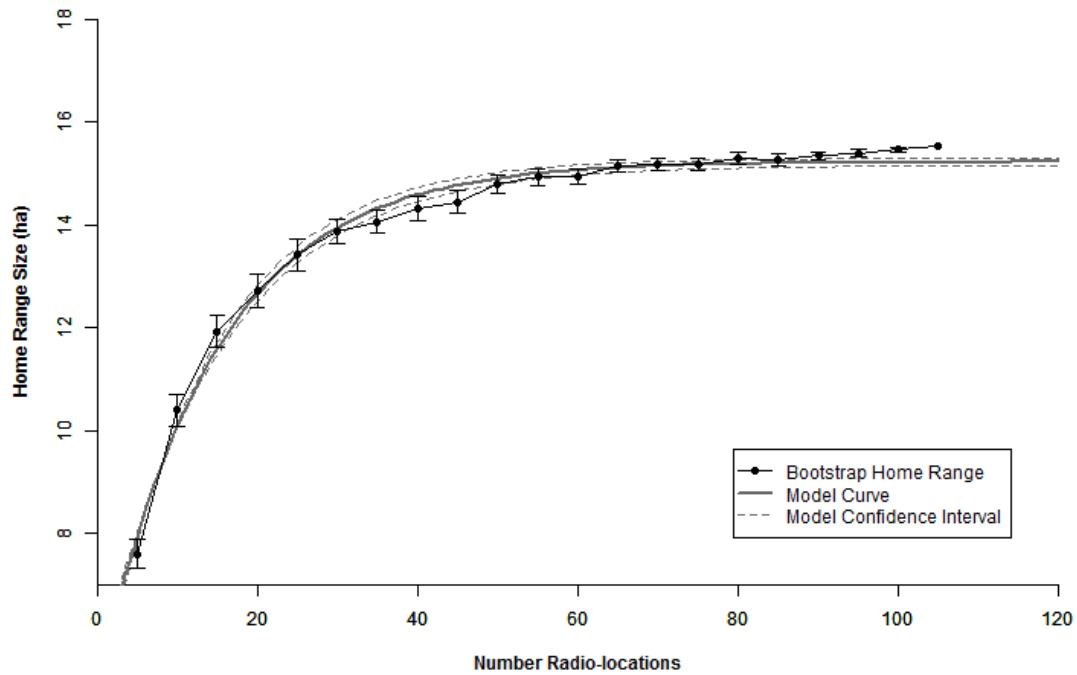

**Figure S2.11:** Downstream female *A. mutica* #13

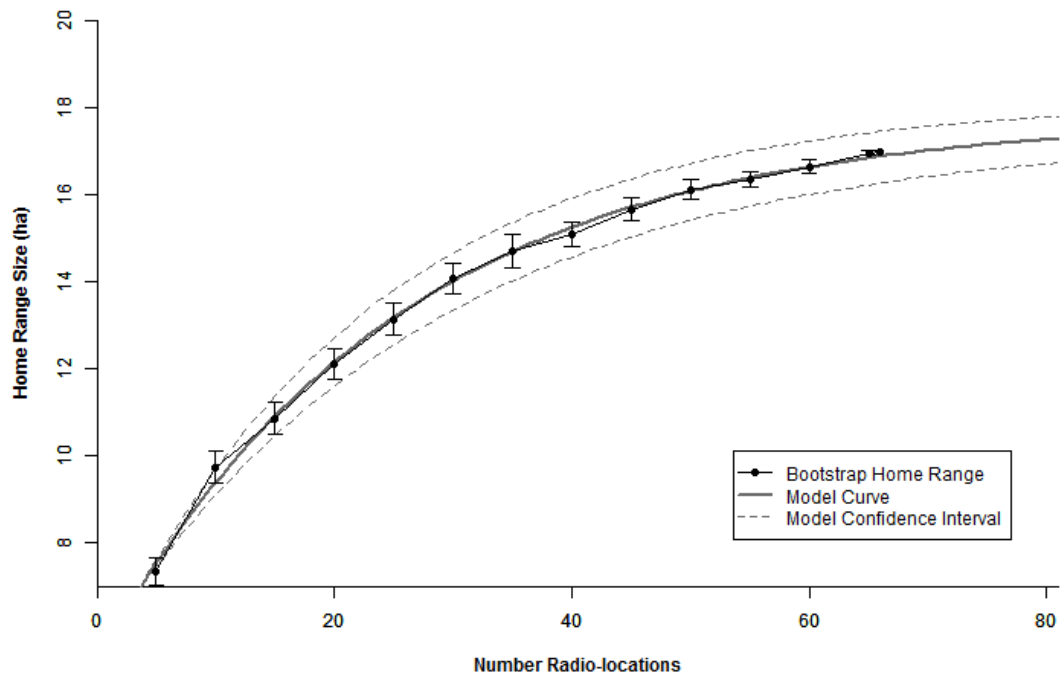

**Figure S2.12:** Downstream female *A. mutica* #14



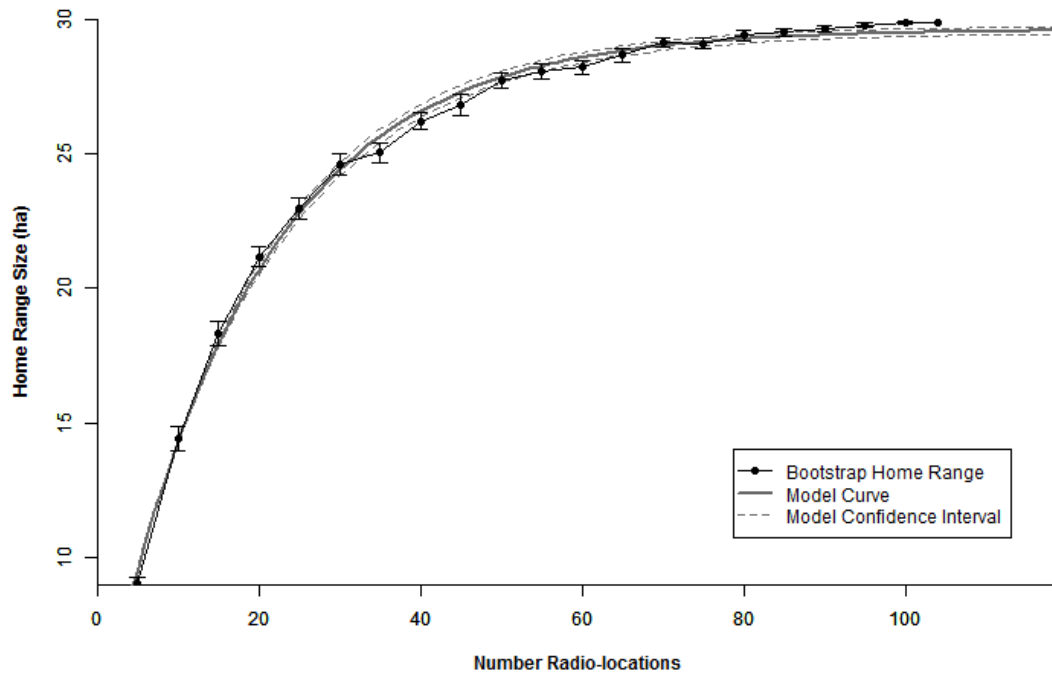

**Figure S2.13:** Downstream female *A. mutica* #15

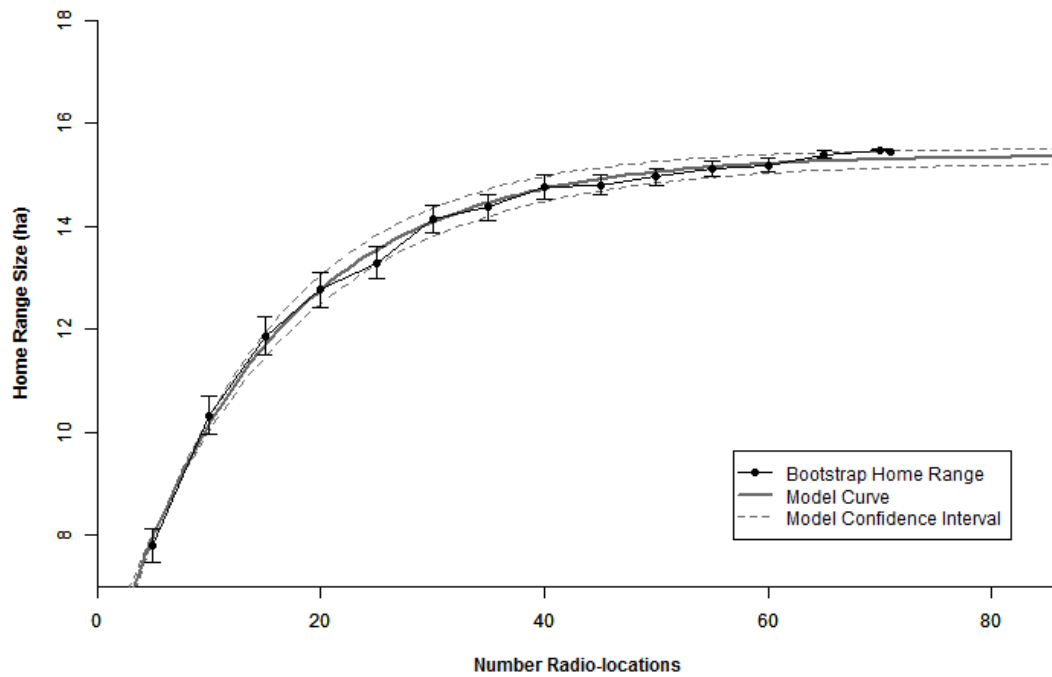

**Figure S2.14:** Downstream female *A. mutica* #16



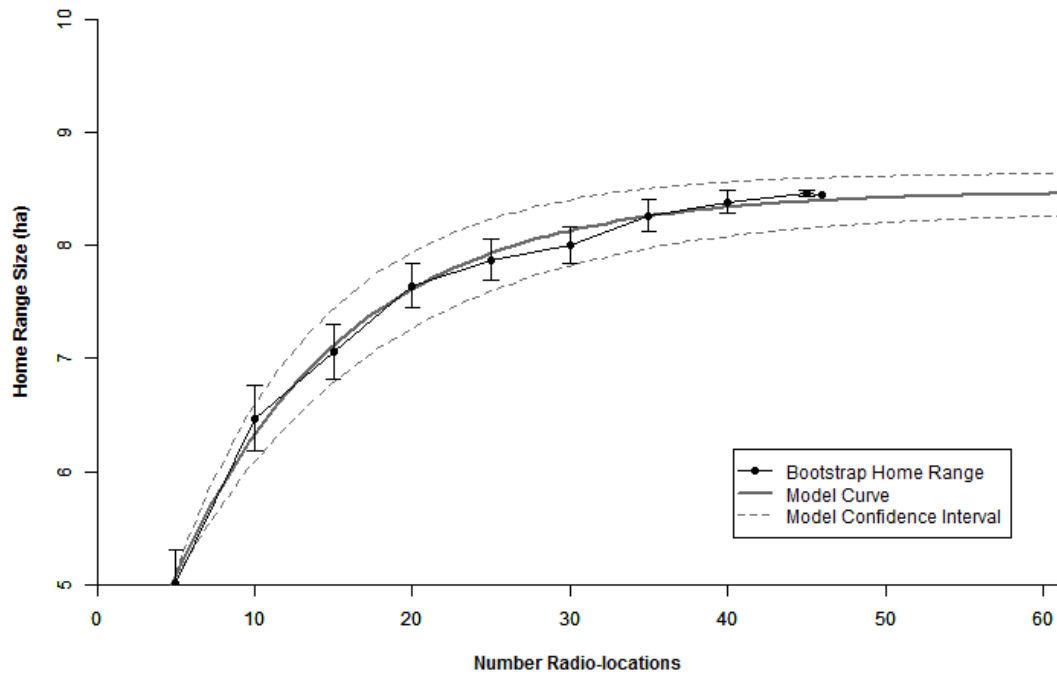

**Figure S2.15:** Downstream male *A. mutica* #17

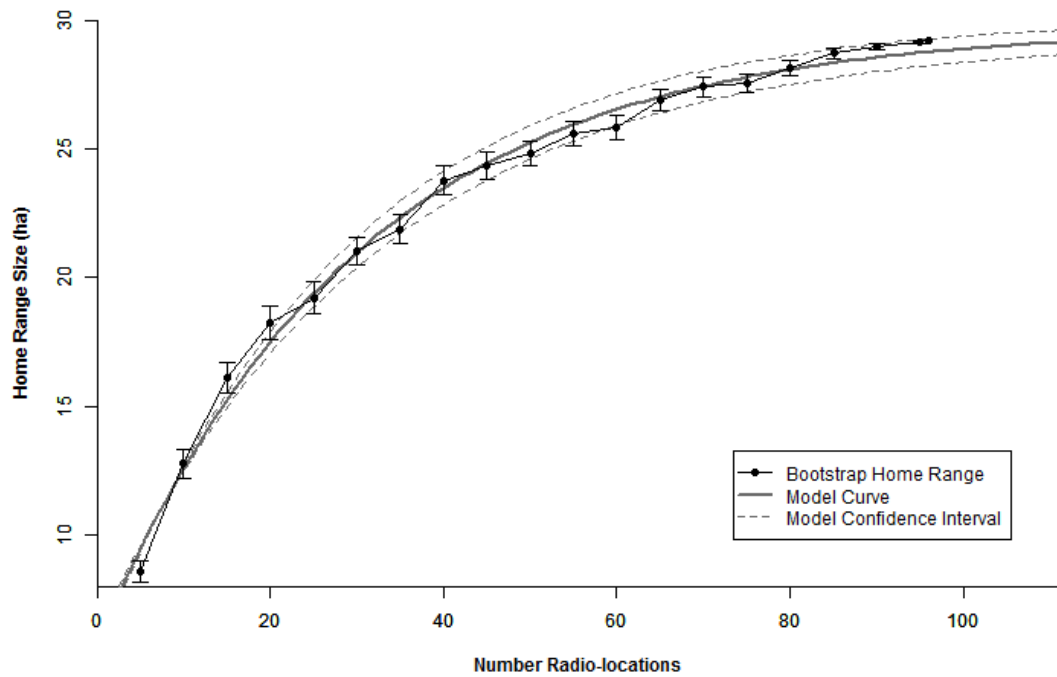

**Figure S2.16:** Downstream male *A. mutica* #18



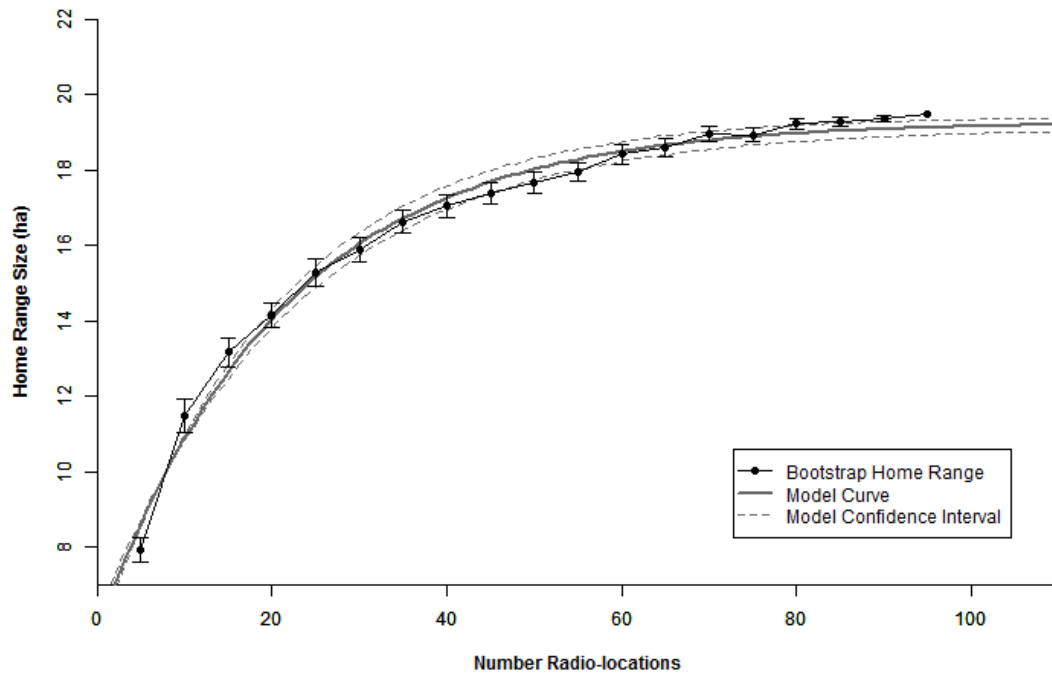

Figure S2.17: Downstream male *A. mutica* #19

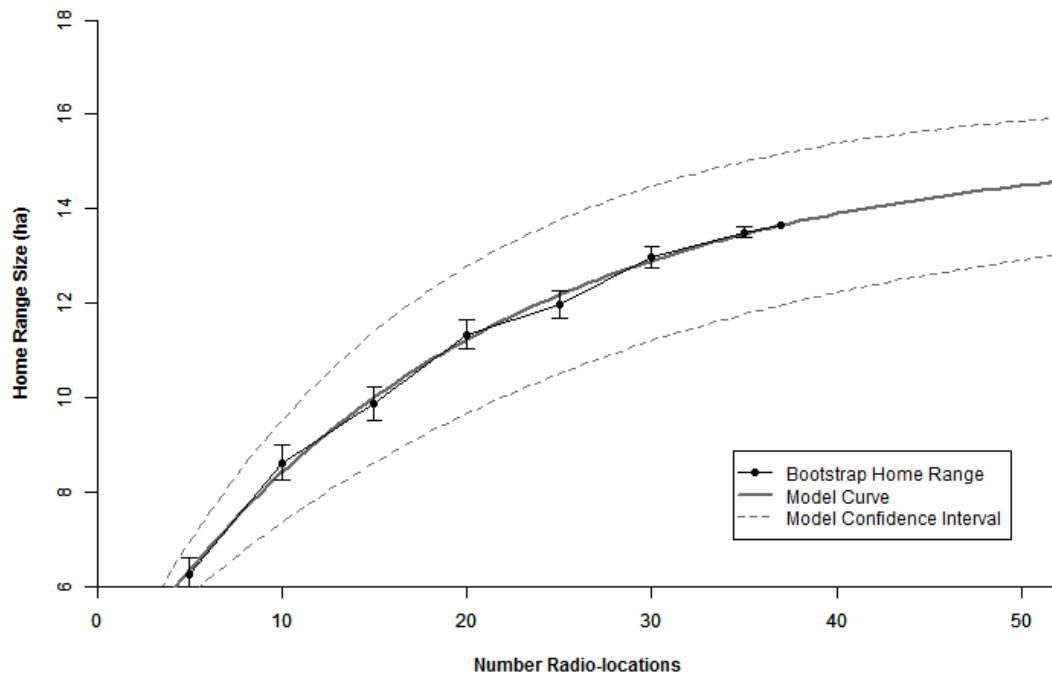

Figure S2.18: Downstream male *A. mutica* #20



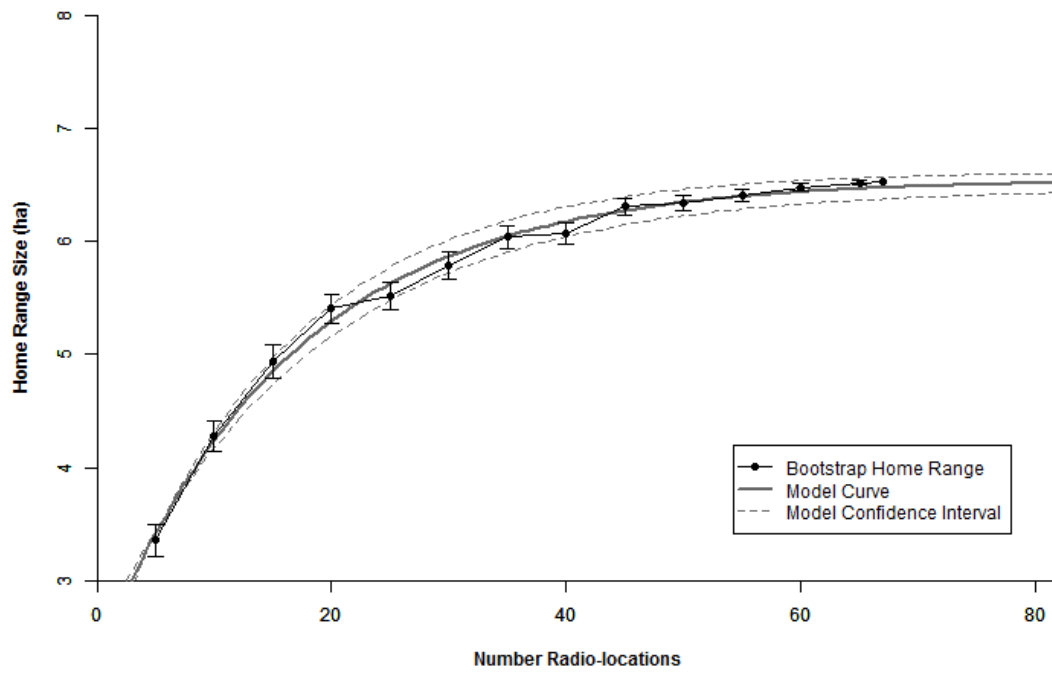

**Figure S2.19:** Upstream female *A. mutica* #21

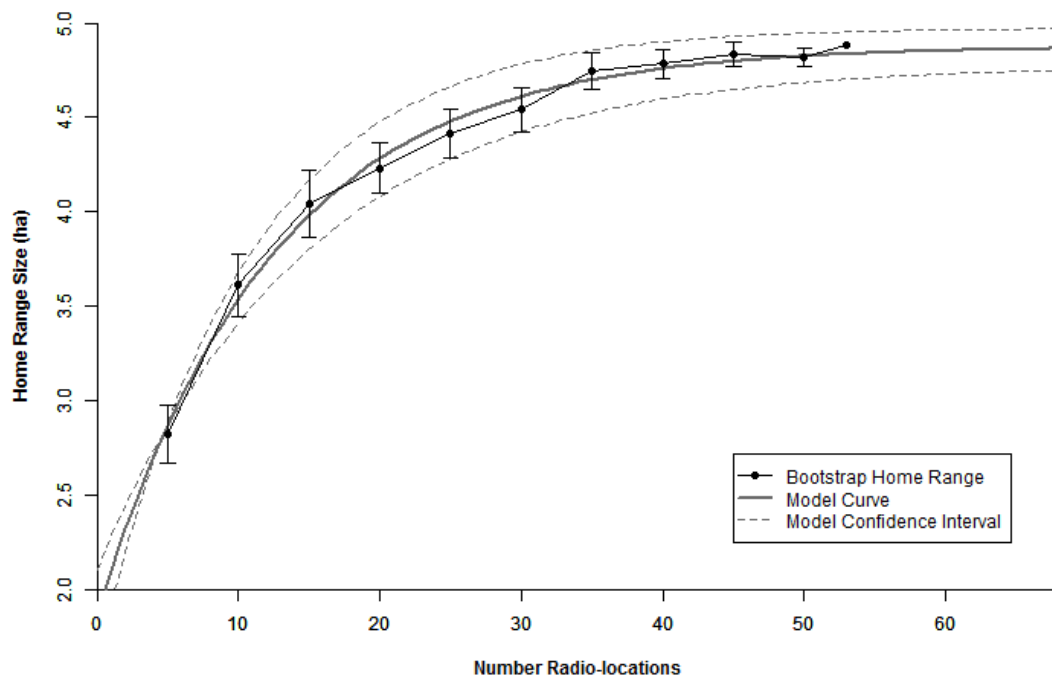

**Figure S2.20:** Upstream female *A. mutica* #25



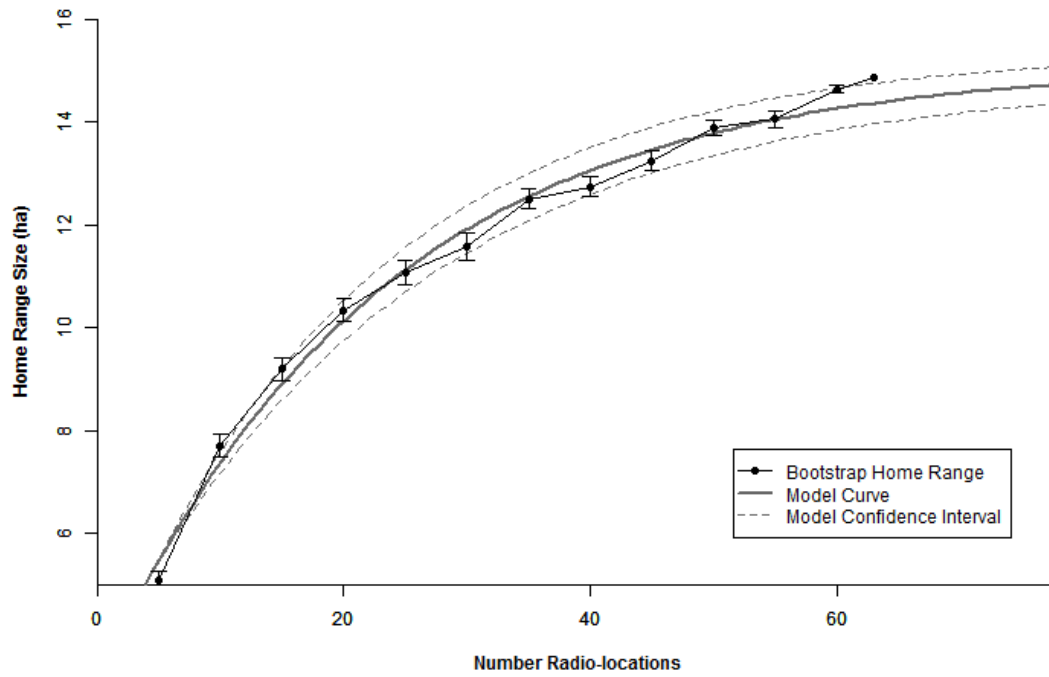

**Figure S2.21:** Upstream female *A. mutica* #26

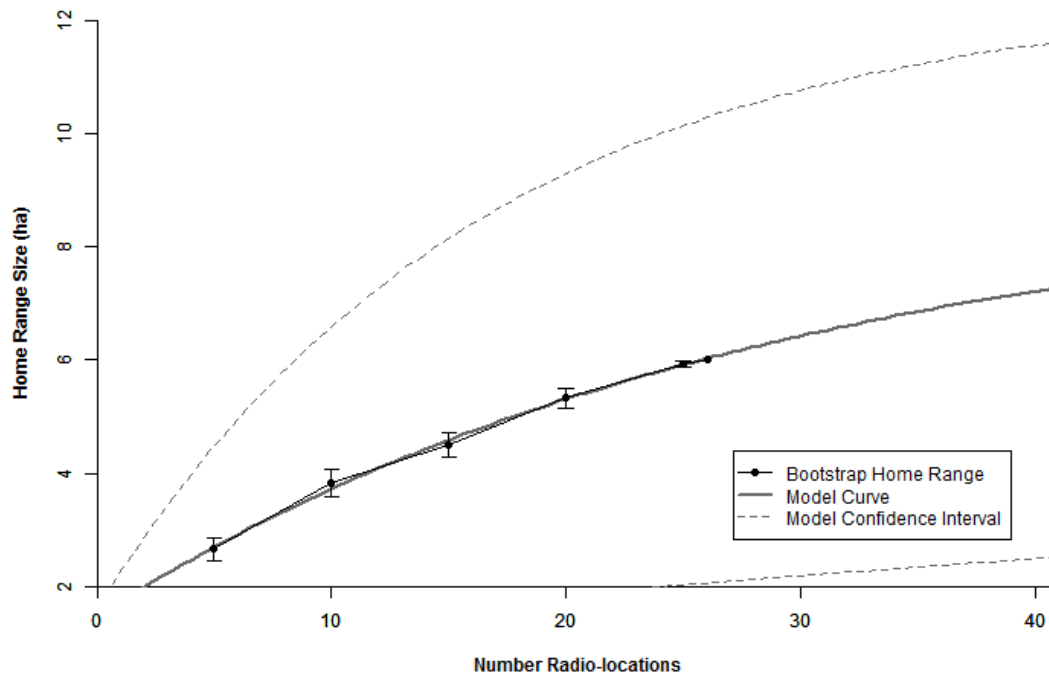

**Figure S2.22:** Upstream female *A. mutica* #27



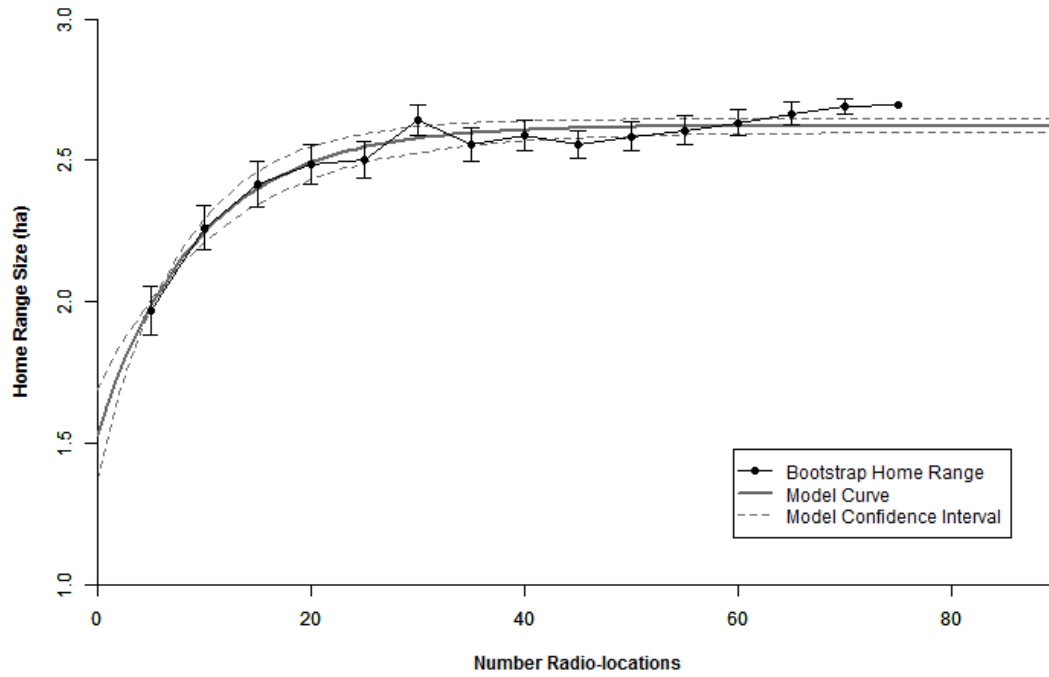

**Figure S2.23:** Upstream male *A. mutica* #29

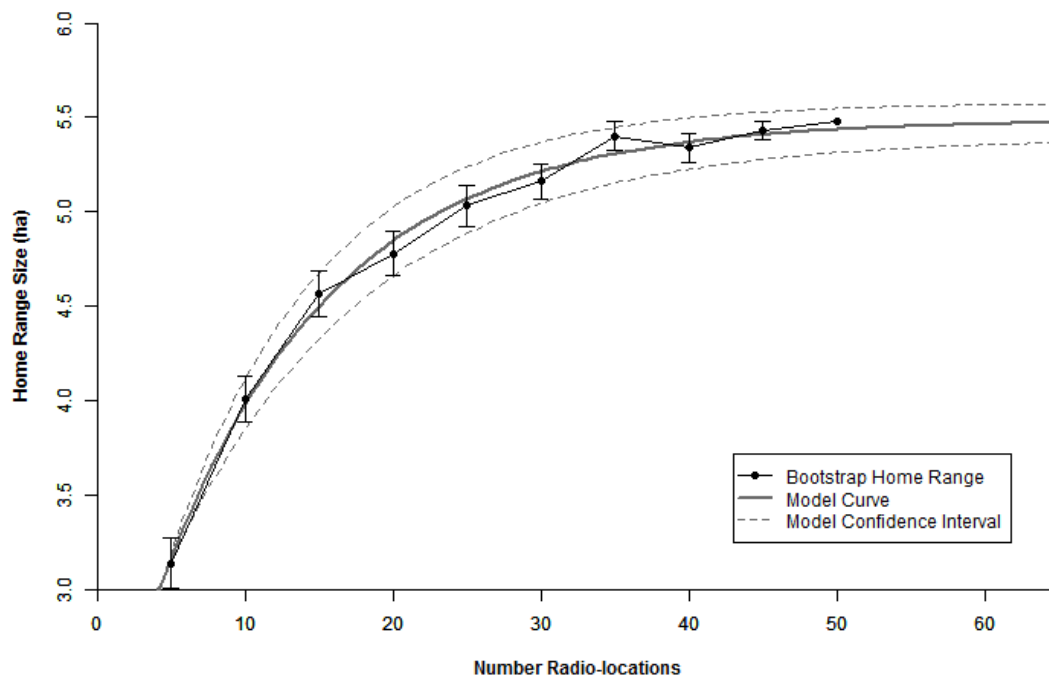

**Figure S2.24:** Upstream female *A. mutica* #30



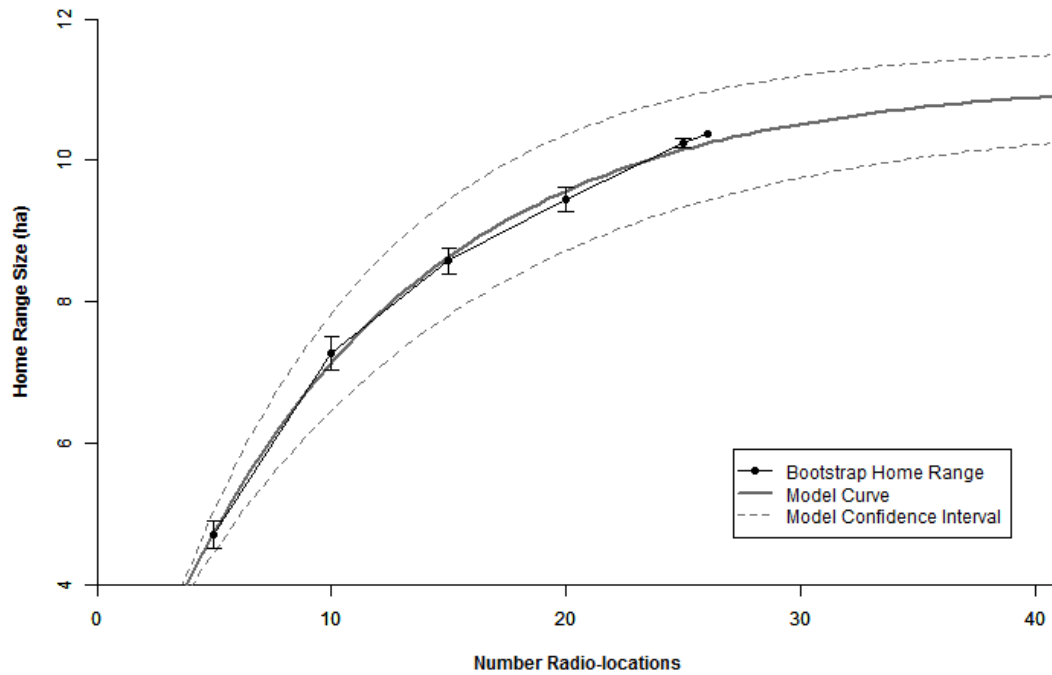

**Figure S2.25:** Upstream female *A. mutica* #32

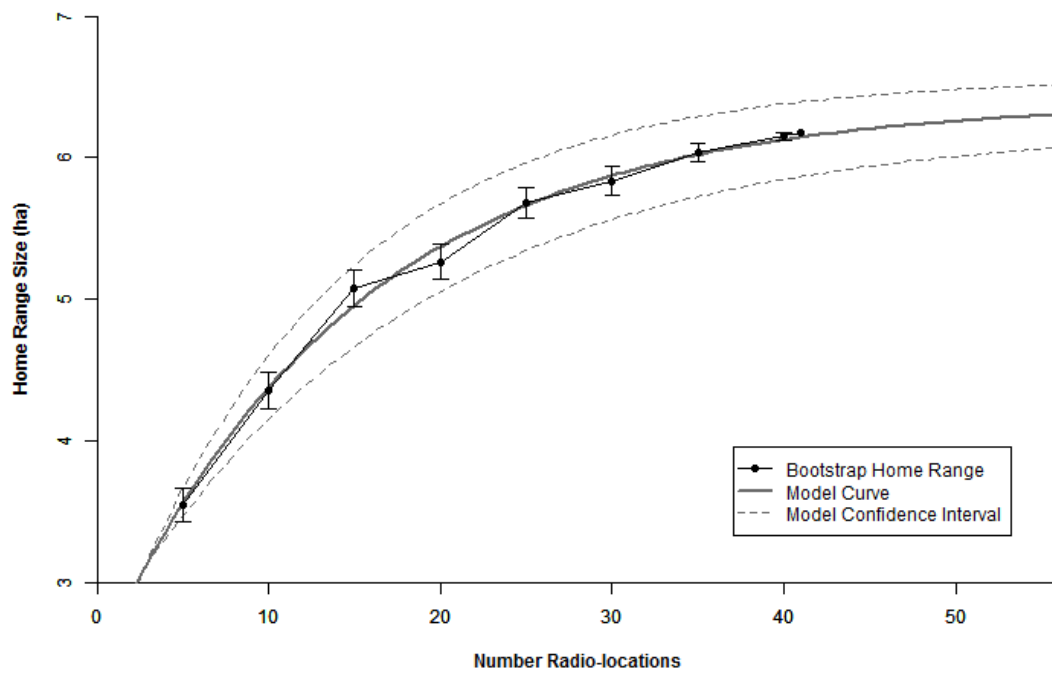

**Figure S2.26:** Upstream male *A. mutica* #33



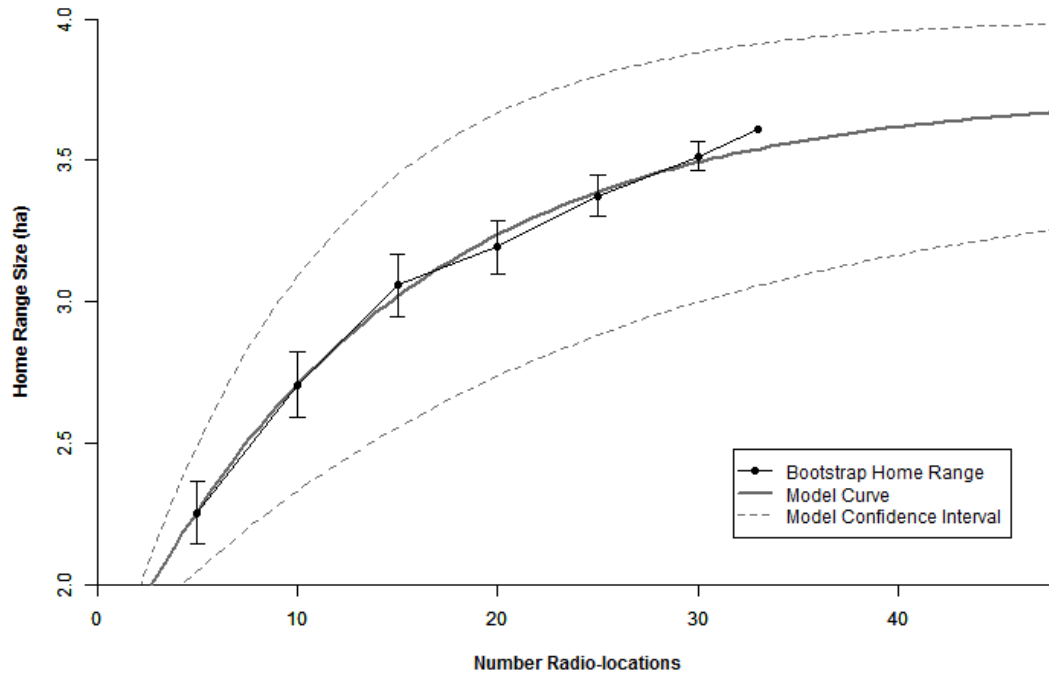

**Figure S2.27:** Upstream female *A. mutica* #35

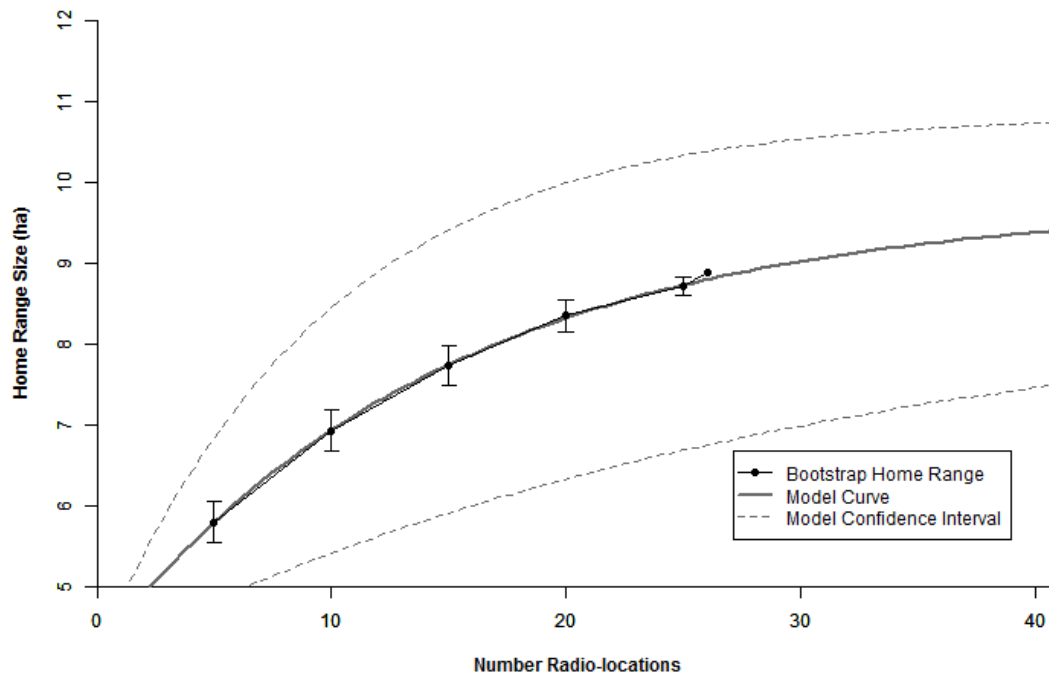

**Figure S2.28:** Downstream female *A. mutica* #41
